# Supplementary material
Source: publisher figshare collection journal article supplement (https://gsajournals.figshare.com/ndownloader/files/23763941)
Supplement: Supplementary file 1 [file 23763941]

Hybrid	Yield	Moisture	TWT	DTA	DTS	EHT	PHT	Lodging
((ARIZONA-LIB_16/PHZ51_B)/PHZ51)-(2N)-002PVP/LH195	7.9298	19.2778	728.2586	73.0541	75.4713	127.9497	253.0469	0.1102
((ARIZONA-LIB_16/PHZ51_B)/PHZ51)-(2N)-003/LH195	7.9929	19.0868	NA	72.4440	74.9854	126.4512	252.5024	0.1137
((CHIRIMITO-VEN_703/PHZ51_B)/PHZ51)-(2N)-001/LH195	8.2063	18.4529	NA	73.9509	76.4044	120.5594	239.1870	0.0660
((JORA-ANC1/PHZ51B)/PHZ51)-(2N)-002/LH195	11.4347	19.0398	NA	74.0394	75.4518	117.6281	248.8508	0.0481
((PHZ51/JALA-JAL44)/PHZ51)-(2N)-001/LH195	8.9971	18.6864	NA	72.6556	75.0425	115.5250	242.7670	0.0379
((TUXPENO-GUA_456/PHZ51_B)/PHZ51)-(2N)-002/LH195	9.7266	19.4937	NA	74.0342	74.9531	117.9552	235.0839	0.0529
(ALTIPLANO_BOV903/PHZ51)/PHZ51_002-(2N)-003/LH195	8.3540	18.3010	NA	72.2287	75.1221	124.5498	255.8111	0.1076
(ALTIPLANO_BOV903/PHZ51)/PHZ51_005-(2N)-005/LH195	8.3856	19.1120	NA	74.2168	75.7223	109.9309	218.9102	0.1633
(BOFO_DGO123/PHZ51)/PHZ51_002-(2N)-002/LH195	9.8506	18.1946	NA	71.1812	72.8193	112.2109	241.1237	0.0902
(CHANDELLE_CUB68_CI/PHZ51)/PHZ51_004-(2N)-001/LH195	10.1636	18.0455	NA	72.2170	74.8293	130.6739	257.2939	0.0634
(CML442-B/CML343-B-B-B-B-B-B)-B-B-1-1-B-B-B-1-B12-1-B19/LH19	9.9881	24.2386	NA	77.5957	79.4857	134.8025	240.3203	0.1264
(CML450-B/TX110)-B-3-B-1-B-B-1-1-B18-B21-B8/LH195	11.0827	22.7423	NA	74.4360	77.9679	120.0115	240.2910	0.0718
(DULCILLO_DEL_NO_SON57/PHZ51)/PHZ51_002-(2N)-003/LH195	8.5736	18.5192	NA	72.9299	75.2069	104.1472	221.9470	0.0310
(ELOTES_OCCIDENT_NAY29/PHZ51)/PHZ51_002-(2N)-001/LH195	9.3376	19.3711	NA	74.3958	76.6442	121.3848	239.7573	0.0238
(ELOTES_OCCIDENT_NAY29/PHZ51)/PHZ51_004-(2N)-004/LH195	8.4146	19.5099	NA	74.8174	75.7409	105.7454	214.5779	0.0605
(KARAPAMPA_BOV978/PHZ51)/PHZ51_003-(2N)-001/LH195	8.8360	18.2759	NA	70.6203	73.3721	116.0611	240.6891	0.0684
(KARAPAMPA_BOV978/PHZ51)/PHZ51_003-(2N)-002/LH195	7.8340	19.1080	NA	72.7121	76.0767	124.4543	249.9117	0.0817
(KARAPAMPA_BOV978/PHZ51)/PHZ51_003-(2N)-006/LH195	8.1539	18.9959	NA	73.6808	75.0805	108.8774	216.6964	0.1071
(KARAPAMPA_BOV978/PHZ51)/PHZ51_003-(2N)-007/LH195	8.8471	19.3441	NA	72.0683	75.2596	120.9808	244.5753	0.0438
(LAMA2002-35-2-B-B-B-B/CG44)-1-3-B-1-1-B24-B5-B16/LH195	8.8450	23.7255	NA	75.9434	79.9036	113.5796	215.3483	0.0698
(LAMA2002-35-2-B-B-B-B/CG44)-1-3-B-1-1-B24-B5-B16/TX777	9.3798	25.7766	NA	81.5282	78.8617	110.9916	226.8879	0.2395
(ONAVENO_SON24/PHZ51)/PHZ51_004-(2N)-001/LH195	9.3436	18.6052	NA	73.8022	75.8734	129.8816	259.2890	0.1427
(ONAVENO_SON24/PHZ51)/PHZ51_005-(2N)-002/LH195	8.3768	19.3327	NA	71.2911	73.9208	114.5614	234.7337	0.1116
(PATILLO_BOV493/PHZ51)/PHZ51_003-(2N)-002/LH195	8.1972	18.8261	NA	71.9730	76.0196	121.2748	249.6045	0.0589
(PHZ51/CON_PN_CUZ13)/PHZ51_007-(2N)-001/LH195	8.6005	18.7327	NA	71.9176	73.8510	103.8579	217.2374	0.0310
(PHZ51/KCELO_BOV948)/PHZ51_001-(2N)-002/LH195	9.0361	18.4452	NA	72.6244	74.4822	112.9777	237.0233	0.0291
(PHZ51/KCELO_BOV948)/PHZ51_003-(2N)-001/LH195	7.8962	18.2843	NA	71.8336	73.4039	113.8335	233.3351	0.0330
(PHZ51/MISHC_ECU321)/PHZ51_004-(2N)-002/LH195	8.2026	18.2464	NA	73.6356	74.9565	109.3096	228.6688	0.0441
(PHZ51/PISAN_BOV344)/PHZ51_001-(2N)-002/LH195	8.4103	19.7605	NA	71.9704	74.6903	110.3326	229.8004	0.0768
(PHZ51/PISAN_BOV344)/PHZ51_001-(2N)-003/LH195	8.1430	19.6235	NA	72.9735	74.3987	129.0304	249.1365	0.0523
(PHZ51/PISAN_BOV344)/PHZ51_001-(2N)-004/LH195	7.6466	18.9321	NA	72.1826	74.3238	107.5153	227.3460	0.0360
(PHZ51/PISAN_BOV344)/PHZ51_001-(2N)-005/LH195	7.4324	20.0093	NA	72.0666	74.1202	119.3902	221.0734	0.0667
(PHZ51/PISAN_BOV344)/PHZ51_001-(2N)-006/LH195	8.2600	19.0941	NA	70.0426	72.5328	115.6586	222.8116	0.0738
(PHZ51/PISAN_BOV344)/PHZ51_002-(2N)-002/LH195	9.1248	18.5483	NA	71.6962	74.4460	117.7505	243.5902	0.0238
(PHZ51/PISAN_BOV344)/PHZ51_003-(2N)-001/LH195	8.8734	18.8221	NA	73.1387	75.8801	126.5258	236.3880	0.0738
(PIRA_TOL405/PHZ51)/PHZ51_002-(2N)-001/LH195	9.4088	19.6199	NA	72.7570	74.6894	121.6625	232.5479	0.0707
(POJ_CHICO_BOV800/PHZ51)/PHZ51_001-(2N)-001/LH195	7.9899	20.2030	NA	73.5402	76.1024	111.4188	228.6053	0.0628
(TX739)_LAMA2002-10-1/LH195	10.2260	23.4158	NA	76.5610	79.9574	125.3299	243.6323	0.1217
(TX739)_LAMA2002-10-1/PB80	12.3729	20.9586	NA	75.3354	78.0052	140.5761	258.0969	0.0947
(YUCATAN_TOL389_ICA/PHZ51)/PHZ51_005-(2N)-001/LH195	8.8243	18.6109	NA	72.6753	74.9393	125.6649	244.3359	0.0751
(YUCATAN_TOL389_ICA/PHZ51)/PHZ51_005-(2N)-002/LH195	9.2875	18.6952	NA	72.4709	74.1334	124.2087	230.3706	0.0480
(YUNGUENO_BOV362/PHZ51)/PHZ51_004-(2N)-001/LH195	8.5982	18.2443	NA	72.6576	74.1106	117.9818	239.2831	0.0634
(YUNGUENO_BOV362/PHZ51)/PHZ51_006-(2N)-002/LH195	8.6812	17.8464	NA	71.7940	74.3046	112.2987	228.1354	0.1414
2369/3IIH6	10.2556	16.4509	NA	69.1805	70.9010	115.8788	235.2862	0.0740
2369/LH123HT	10.6053	18.9283	NA	71.1478	73.7358	127.5965	249.4605	0.0730
2369/PHZ51	9.8855	18.0096	NA	70.8734	73.2170	123.7180	248.8718	0.1076
2FACC/3IIH6	10.2780	15.6059	NA	66.6719	68.0915	103.3580	217.4243	0.0723
4N506/3IIH6	9.9756	15.9043	NA	69.1332	70.7280	113.0743	236.4373	0.1036
6F629/3IIH6	10.1070	16.3341	NA	68.3309	69.9978	105.0131	229.3943	0.0564
740/B47	11.9402	18.9792	NA	69.2317	70.8724	113.3198	227.7481	0.1087
740/PB80	8.4026	18.0364	NA	70.8554	73.7408	124.4063	227.0688	0.1855
78010/3IIH6	9.1101	15.5863	NA	68.1492	69.4736	109.3582	214.5632	0.0556
A632/3IIH6	8.2237	15.1961	NA	68.2654	69.8212	113.5728	230.1513	0.1623
A634/3IIH6	7.8881	15.5553	NA	68.0583	69.4417	105.4234	220.9272	0.1163
A634/LH82	7.2090	15.9913	NA	65.3419	66.5710	90.4702	194.8178	0.1703
A634/PHZ51	8.8001	15.7744	NA	69.4380	71.5313	121.1846	234.8813	0.1561
A635/3IIH6	8.0054	15.3971	NA	66.7876	68.5796	100.6748	214.3888	0.1089
A635/LH82	8.6136	15.6323	NA	65.1798	67.0459	85.5455	192.3843	0.0813
A635/PHZ51	8.5343	15.1483	NA	69.8914	72.2096	106.3121	235.0517	0.0931
A641/LH82	7.5380	15.4017	NA	62.1667	63.3486	81.6140	177.5679	0.1360
A641/PHZ51	7.9890	14.7123	NA	65.9482	67.0607	100.1597	214.6209	0.1288
A672/LH82	7.9994	16.0270	NA	66.8125	68.2544	92.6794	193.7512	0.2214
A672/PHZ51	8.5154	15.7345	NA	68.8146	71.2083	119.1338	233.1065	0.1693
A679/3IIH6	9.6193	15.5807	NA	67.4217	69.0316	113.3388	228.4701	0.1012
A679/LH82	9.3256	16.5807	NA	66.0192	67.4189	94.7900	197.8309	0.1200
A679/PHZ51	9.3670	16.5485	NA	68.6674	70.4971	118.7840	238.4067	0.1136
A680/3IIH6	10.2413	15.9629	NA	69.0516	70.2360	121.3118	237.2926	0.1395
A680/LH82	9.9017	17.9024	NA	68.2626	69.8936	103.8045	210.9613	0.1116
A680/PHZ51	9.4622	17.9450	NA	71.7493	74.1119	128.1745	245.8837	0.1096
AH83/3IIH6	4.8729	18.7892	NA	76.2663	80.4176	121.2084	219.9094	0.0814
ARGENTINE_FLINTY_COMPOSITE-C(1)-37-B-B-B2-1-B25/LH195	8.9328	26.6629	NA	78.8903	82.0915	127.2769	241.2920	0.0543
B103/B47	8.6327	18.6710	NA	68.7883	70.0861	106.3842	207.5647	0.1404
B103/LH82	9.1393	21.5208	NA	66.8281	68.9928	91.6330	215.5661	0.0963
B103/PHZ51	8.2408	18.6658	NA	72.0070	74.1657	105.3287	243.3068	0.0573
B104/3IIH6	10.3924	17.1584	NA	69.7051	71.4684	106.6865	227.9109	0.1065
B104/LH82	9.3264	19.0606	NA	68.2027	70.8003	93.3249	204.8708	0.1434
B104/PHZ51	9.9122	18.5782	NA	70.6499	73.2575	113.3013	240.1987	0.0943
B105/3IIH6	9.1050	17.7284	NA	68.5896	70.6605	97.5167	218.3260	0.0961
B105/LH82	8.7907	20.4462	NA	66.5991	68.5427	83.5021	200.8281	0.0684
B105/PHZ51	9.0592	18.3294	NA	70.8174	73.5751	106.8856	240.6102	0.0903
B106/LH82	8.5152	18.7441	NA	66.8356	68.8515	101.0020	220.6106	0.1656
B106/PHZ51	8.2875	18.6870	NA	69.6036	72.9119	120.8953	253.6905	0.1353
B109/3IIH6	10.0106	16.4445	NA	69.2019	70.8876	114.1062	224.8825	0.0759
B109/LH82	9.8913	20.3753	NA	68.1281	69.6720	97.6647	199.0572	0.1006
B109/PHZ51	9.7544	18.6075	NA	70.4870	73.5309	123.3722	249.0140	0.0750
B110/3IIH6	11.1592	17.0958	NA	69.6893	71.9772	110.5635	232.2897	0.1069
B111/3IIH6	10.8810	17.1375	NA	70.2450	71.4540	123.4479	238.9129	0.0881
B111/LH82	9.5023	18.2902	NA	65.3180	67.4960	82.3041	191.9700	0.0858
B111/PHZ51	9.8518	18.8221	NA	71.3750	72.9756	131.5413	248.0052	0.0698
B118/B47	8.7774	16.6660	NA	67.3426	70.0577	114.7035	230.8179	0.0898
B119/3IIH6	11.0165	16.2351	NA	69.0882	70.6057	117.1608	225.0935	0.0962
B119/LH82	8.8925	17.8456	NA	66.8066	68.8575	96.7467	201.8306	0.1440
B119/PHZ51	8.5504	18.4461	NA	70.5950	72.1374	122.9368	234.7677	0.1775
B14/3IIH6	8.1435	15.3082	NA	69.4522	71.4506	111.6942	229.4138	0.0789
B14A/C103	6.5592	20.5188	NA	72.6445	77.5482	120.5340	247.1376	0.0849
B14A/H95	8.7150	18.6221	NA	71.9159	74.7050	115.4446	228.5608	0.1220
B14A/LH82	8.5423	17.4284	NA	67.9242	69.5223	107.3700	206.0402	0.1383
B14A/MO17	9.5947	18.9213	NA	71.1011	73.5267	122.4432	238.5224	0.1416
B14A/OH43	8.5615	19.6571	NA	69.8391	72.6226	113.1019	232.4161	0.1011
B2/3IIH6	5.1872	17.7247	NA	72.4446	76.2700	123.9613	240.5497	0.1343
B37/C103	7.7382	20.3144	NA	72.3576	76.6577	121.7080	244.4977	0.1404
B37/H95	8.5188	19.4956	NA	71.4907	74.2458	117.6352	236.4499	0.1512
B37/MO17	9.5577	19.8554	NA	70.8294	74.4437	121.2046	232.4526	0.1549
B37/OH43	8.9707	19.9869	NA	69.2266	72.1710	111.0335	233.8708	0.1156
B37/PHZ51	9.3602	18.9056	NA	70.2682	73.1475	120.1082	245.0504	0.1689
B47/3IIH6	10.5710	15.7711	NA	68.4909	69.2091	111.4980	231.0823	0.1186
B47/LH123HT	10.7111	18.0023	NA	70.4148	71.9637	114.8152	239.7768	0.0617
B47/LH162	8.9266	15.8772	NA	65.8540	66.9965	97.0872	209.5251	0.0974
B47/LH185	10.6961	17.4437	NA	68.5683	69.4531	96.4968	218.4689	0.1118
B47/LH195	8.7901	18.8307	NA	73.1387	74.4444	110.2383	221.4252	0.1007
B47/PB80	9.4059	18.2714	NA	69.2175	70.9631	104.8790	221.6109	0.0869
B47/PHK05	7.4894	15.2637	NA	62.7094	62.9075	96.7634	214.4836	0.1587
B47/PHK56	10.8597	17.1120	NA	68.3796	69.3099	97.6584	225.0358	0.0730
B47/PHK76	8.8656	17.0335	NA	68.3741	69.7631	101.7790	220.2156	0.0862
B47/PHW03	9.6277	16.5809	NA	65.7085	66.3723	105.5741	222.4016	0.0823
B47/PHZ51	9.4034	16.8157	745.2710	69.1267	70.7259	108.4799	232.3994	0.0830
B68/LH82	7.9752	19.7067	NA	68.7552	71.6145	83.7172	190.3382	0.1172
B68/PHZ51	9.7084	17.6095	NA	72.0323	73.7824	120.9479	250.3354	0.0598
B73/3IIH6	9.7199	15.7746	NA	68.8874	70.4579	120.1680	231.1020	0.1040
B73/LH162	7.9090	17.7347	NA	67.7526	70.5905	111.8961	221.9110	0.1422
B73/MO17	10.3808	18.9205	NA	70.7093	73.8658	121.5116	236.7645	0.1163
B73/OH7B	8.3339	NA	NA	72.5305	76.3317	99.7291	228.8818	0.0674
B73/PHG35	10.2751	18.2931	NA	71.5272	73.2482	121.2499	230.2510	0.1002
B73/PHM49	10.4666	19.2055	NA	71.4379	73.7528	120.9331	231.8685	0.0766
B73/PHN82	10.5441	19.2831	NA	70.5810	73.3117	118.4441	228.5142	0.1096
B73/PHP02	12.7702	19.3411	NA	70.2042	71.4862	117.0858	221.0848	0.1658
B73/PHZ51	9.9926	18.0970	NA	70.4838	72.2234	124.1402	248.4267	0.0838
B73/TX205	10.6640	19.9636	NA	72.9604	74.5990	130.2278	243.2187	0.1221
B73/TX6252	10.0356	19.3561	NA	69.7811	73.1930	113.2635	235.1570	0.1076
B73/TX777	8.9029	22.5059	NA	74.7286	79.9338	140.8982	258.0490	0.0475
B73_NC230-032-1-1-1-1/LH195	9.0247	20.0607	NA	74.7723	76.4736	110.2966	214.6054	0.0752
B73_NC230-040-1-1-1-1/LH185	9.8532	20.0072	NA	70.9956	72.2788	111.5829	226.6939	0.0712
B73_NC230-040-1-1-1-1/LH198	6.9632	21.9828	NA	74.1783	77.2631	113.8027	216.0994	0.0954
B73_NC230-041-1-1-1-1/LH185	9.4389	20.1631	NA	69.3243	71.8827	96.3267	200.8393	0.0560
B73_NC230-041-1-1-1-1/LH195	8.7207	20.3305	NA	74.4672	76.7079	107.5494	208.4567	0.0475
B73_NC230-041-1-1-1-1/LH198	6.0611	20.0603	NA	73.7777	75.6420	108.5265	207.6496	0.0847
B73_NC230-041-1-1-1-1/PB80	8.5023	18.6566	NA	73.3195	75.1388	113.3715	207.6311	0.0697
B73_NC230-059-1-1-1-1/LH185	10.1253	21.8534	NA	71.1863	72.6901	108.5409	216.3700	0.0886
B73_NC230-059-1-1-1-1/LH198	6.4330	23.3197	NA	74.1631	78.6851	112.8346	219.0889	0.2057
B73_NC230-126-1-1-1-1/LH195	8.9446	21.0836	NA	74.6827	76.2561	106.0386	212.8548	0.0582
B73_NC230-127-1-1-1-1/LH195	9.7382	22.4876	NA	73.9585	74.7540	99.9952	208.2474	0.0725
B73_NC230-127-1-1-1-1/PB80	8.8174	20.3879	NA	73.0462	74.5993	114.1434	210.2119	0.0642
B73_NC230-128-1-1-1-1/LH195	9.0810	20.7482	NA	75.8822	77.0313	114.4612	227.9881	0.1331
B73_NC230-128-1-1-1-1/PB80	8.1451	19.7602	NA	74.9547	76.7866	119.4823	225.9232	0.1474
B73_NC230-129-1-1-1-1/LH185	10.4456	21.5033	NA	70.0647	71.9261	101.2556	214.2087	0.0927
B73_NC230-129-1-1-1-1/LH195	10.3158	20.9065	NA	74.1995	76.1046	117.3620	217.2618	0.0731
B73_NC230-129-1-1-1-1/LH198	7.1809	23.8271	NA	72.9826	76.3616	108.9659	208.5725	0.1134
B73_PHG39-1/LH82	8.6210	18.5455	NA	67.4940	68.9300	88.2998	200.5428	0.0937
B73_PHG39-1/PHZ51	9.5594	18.5085	NA	68.8697	71.5877	113.8259	232.0414	0.0554
B73_PHG39-10/LH82	8.5441	18.3452	NA	66.7433	68.3453	85.4380	203.3842	0.1429
B73_PHG39-10/PHZ51	8.4357	17.4364	NA	69.2347	72.5711	117.6621	243.4409	0.1873
B73_PHG39-11/LH82	10.2903	19.5997	NA	66.4216	68.5818	90.9847	194.6909	0.0838
B73_PHG39-11/PHZ51	10.1370	18.5820	NA	71.0626	73.5166	124.4166	240.9668	0.0842
B73_PHG39-12/LH82	8.7974	17.9403	NA	66.1085	67.7348	83.9598	192.5183	0.0933
B73_PHG39-12/PHZ51	10.0343	17.3218	NA	71.9831	72.9671	116.4777	247.0453	0.0923
B73_PHG39-13/LH82	9.5176	18.6677	NA	67.0242	68.3647	96.9731	218.3355	0.0871
B73_PHG39-13/PHZ51	10.2987	17.9769	NA	69.3529	71.7398	114.1870	251.7066	0.0532
B73_PHG39-14/PHZ51	10.1400	19.0533	NA	72.4703	74.6158	127.3931	250.8571	0.0739
B73_PHG39-16/LH82	8.4312	17.5366	NA	67.1334	69.8083	90.1996	184.6614	0.0956
B73_PHG39-16/PHZ51	8.0895	17.3088	NA	70.1802	72.6692	114.3223	239.1476	0.0805
B73_PHG39-17/LH82	8.5959	18.0322	NA	65.6865	70.0055	102.1885	209.7490	0.0745
B73_PHG39-17/PHZ51	7.3168	17.6345	NA	70.1094	72.9014	111.6448	235.6333	0.1025
B73_PHG39-19/LH82	9.1455	19.1724	NA	66.7855	69.1775	75.1382	184.0719	0.1065
B73_PHG39-19/PHZ51	11.0758	18.4315	NA	70.2750	72.3927	117.7526	234.8819	0.0849
B73_PHG39-2/LH82	9.3314	19.3924	NA	66.9111	69.5294	95.5450	208.6355	0.0662
B73_PHG39-2/PHZ51	9.6204	18.2849	NA	69.1073	71.9183	111.8493	237.6173	0.0842
B73_PHG39-20/LH82	8.8416	17.8956	NA	66.0112	67.2435	95.5044	201.8044	0.1287
B73_PHG39-20/PHZ51	9.4101	18.1676	NA	68.3861	71.2047	113.2898	233.5078	0.0502
B73_PHG39-21/LH82	9.6761	19.0571	NA	66.5967	70.0297	84.1543	205.4998	0.0317
B73_PHG39-21/PHZ51	9.9723	18.4038	NA	71.1941	73.1851	117.3970	250.9030	0.0631
B73_PHG39-23/LH82	10.5873	19.3513	NA	66.6323	67.8273	86.9530	208.6436	0.0273
B73_PHG39-23/PHZ51	9.6393	17.9459	NA	68.9031	70.7681	118.5209	246.3296	0.0894
B73_PHG39-24/LH82	10.3972	18.7766	NA	66.7288	68.0274	85.1524	198.7295	0.0275
B73_PHG39-24/PHZ51	9.8522	18.4733	NA	70.1106	71.8545	107.5764	244.8866	0.0437
B73_PHG39-25/LH82	9.0816	18.7812	NA	67.5562	70.2289	97.0247	196.7226	0.1100
B73_PHG39-25/PHZ51	9.8310	18.0416	NA	71.1393	72.0521	122.2806	239.8183	0.0786
B73_PHG39-3/LH82	8.9331	18.0732	NA	65.4133	67.7622	89.2509	195.3939	0.0674
B73_PHG39-3/PHZ51	9.4514	17.9971	NA	69.3215	71.9210	113.5212	239.6958	0.1069
B73_PHG39-4/LH82	8.5737	18.7022	NA	66.9083	69.3143	82.7311	189.4912	0.0745
B73_PHG39-4/PHZ51	9.6921	18.0820	NA	69.3930	71.4373	109.1956	238.9152	0.0462
B73_PHG39-5/PHZ51	10.8418	18.5916	NA	70.1135	72.7542	135.1612	259.8408	0.0587
B73_PHG39-6/LH82	8.5153	18.2977	NA	66.1765	68.5148	86.1998	194.5033	0.0808
B73_PHG39-6/PHZ51	9.5284	18.3782	NA	69.2878	71.9009	118.7875	251.3928	0.0564
B73_PHG39-7/LH82	9.2338	18.2779	NA	66.7155	68.1490	83.4873	194.2755	0.0537
B73_PHG39-7/PHZ51	9.2416	18.0933	NA	67.2601	65.7965	106.6748	226.8975	0.0753
B73_PHG39-8/LH82	10.3931	18.4803	NA	66.4061	68.3955	79.2985	186.1435	0.1133
B73_PHG39-8/PHZ51	9.2552	17.9554	NA	70.5644	72.7191	112.4604	234.9640	0.0774
B76/LH82	7.8045	18.4630	NA	65.0089	68.0987	89.6724	195.4461	0.3034
B76/PHZ51	9.1450	17.9771	NA	68.9696	71.1988	105.9507	223.6374	0.1459
B79/LH82	7.8397	18.6214	NA	66.2576	67.9241	84.4719	166.8096	0.0865
B79/PHZ51	9.5323	18.1396	NA	69.2725	71.6382	120.4548	222.6815	0.0753
B84/3IIH6	10.0966	16.1719	NA	69.6291	71.6288	127.7420	246.2219	0.1610
B97/B47	9.4151	17.5963	NA	67.9151	69.8864	103.2314	226.5798	0.1397
B97/LH195	10.6684	18.6728	NA	71.3801	73.5949	112.0313	230.3586	0.0662
B97/LH82	9.7489	17.8987	NA	67.6000	69.6774	106.6481	219.4275	0.1090
BR105:N(PHZ51)(PHZ51)-(2N)-001/LH195	8.0004	19.6826	NA	73.4856	75.5362	110.4869	221.3424	0.0898
BR105:N(PHZ51)(PHZ51)-(2N)-003/LH195	9.1029	18.8484	NA	72.1948	74.1436	119.4170	249.0708	0.0580
BSSSC0_001/3IIH6	7.8768	16.1378	NA	70.3282	72.1480	113.9623	229.3516	0.2161
BSSSC0_002/3IIH6	6.7703	15.9439	NA	69.5907	72.1696	119.8919	232.8866	0.1766
BSSSC0_002/LH82	8.9502	17.2719	NA	66.7581	69.0937	99.5274	201.6575	0.1168
BSSSC0_002/PHZ51	7.6848	16.6263	NA	71.4869	75.5485	128.0458	247.3462	0.2760
BSSSC0_003/3IIH6	7.9044	15.6055	NA	68.9151	70.4316	93.5576	210.8187	0.1508
BSSSC0_005/3IIH6	5.8873	17.5656	NA	70.2385	72.1917	120.3537	234.2245	0.1848
BSSSC0_008/3IIH6	8.4874	15.6640	NA	69.0844	71.5383	124.0554	237.6560	0.1591
BSSSC0_008/LH82	7.2210	17.0371	NA	67.1697	69.6508	99.9115	200.2969	0.2294
BSSSC0_008/PHZ51	8.5627	17.5393	NA	69.5783	72.2363	119.1335	236.3042	0.1452
BSSSC0_009/3IIH6	8.6137	16.1750	NA	69.3790	71.3501	120.2116	239.3585	0.1539
BSSSC0_010/PHZ51	6.6020	17.6681	NA	69.6335	75.2534	127.0661	250.1184	0.1631
BSSSC0_012/3IIH6	8.9885	16.1510	NA	69.5565	71.9873	122.5658	236.7941	0.1343
BSSSC0_012/PHZ51	9.1150	18.3133	NA	71.9866	74.9905	136.7747	255.5522	0.1298
BSSSC0_015/3IIH6	8.4202	16.7239	NA	69.6205	71.2787	109.7668	227.0410	0.1263
BSSSC0_017/3IIH6	7.5899	15.5554	NA	69.0718	70.7757	117.5119	225.6260	0.2080
BSSSC0_020/3IIH6	8.1710	15.2973	NA	68.3459	70.3959	108.4539	224.0043	0.1004
BSSSC0_020/PHZ51	6.1571	17.7070	NA	69.7605	73.6001	111.1112	228.3032	0.1101
BSSSC0_021/LH82	7.1817	18.7954	NA	65.6884	70.7243	84.3201	185.3015	0.0530
BSSSC0_023/LH82	6.4827	16.7763	NA	64.3610	66.0725	90.7251	192.1605	0.1423
BSSSC0_023/PHZ51	6.9634	17.8297	NA	68.0691	72.8470	106.2703	226.7219	0.1933
BSSSC0_024/3IIH6	7.4782	16.2349	NA	68.1355	69.9568	110.7311	221.3514	0.0961
BSSSC0_026/3IIH6	9.5238	16.1821	NA	69.5505	72.1111	111.2715	228.9482	0.1654
BSSSC0_028/LH82	7.1211	17.0488	NA	66.1888	69.1720	84.0754	198.2041	0.1171
BSSSC0_028/PHZ51	7.4830	17.1333	NA	70.7180	73.7082	119.1611	245.1342	0.1665
BSSSC0_029/3IIH6	9.1243	16.7398	NA	69.2742	71.2709	102.4759	230.5600	0.0872
BSSSC0_029/PHZ51	9.0420	18.2959	NA	71.1613	74.1027	128.8882	250.3889	0.0826
BSSSC0_031/LH82	7.2045	17.9419	NA	66.4140	68.6150	103.9818	209.5108	0.1383
BSSSC0_031/PHZ51	7.4929	17.2142	NA	69.5303	72.3322	124.4563	236.2429	0.3742
BSSSC0_032/LH82	8.2748	18.0552	NA	67.2345	69.9714	89.2629	194.4483	0.0817
BSSSC0_032/PHZ51	7.8189	18.0119	NA	70.1184	73.8259	110.0677	233.5226	0.0911
BSSSC0_033/3IIH6	6.9618	16.4015	NA	70.6380	73.8664	118.7895	231.6160	0.2291
BSSSC0_038/3IIH6	7.1790	16.3078	NA	70.3164	71.6709	100.8372	209.7129	0.0920
BSSSC0_038/LH82	7.1195	17.9310	NA	68.2899	70.3465	89.6787	182.7825	0.0881
BSSSC0_038/PHZ51	7.7142	17.1408	NA	69.9992	71.4187	108.8639	214.0893	0.1385
BSSSC0_044/LH82	8.8395	17.3064	NA	67.8098	69.6290	88.4562	197.1079	0.0849
BSSSC0_044/PHZ51	8.4465	17.6161	NA	71.1808	74.1138	117.3048	238.2599	0.1062
BSSSC0_047/LH82	7.1062	15.9164	NA	66.5484	69.1679	81.5307	182.6608	0.0832
BSSSC0_047/PHZ51	6.8328	16.0195	NA	70.0443	72.9512	107.8388	224.5069	0.1472
BSSSC0_052/LH82	7.8354	17.6035	NA	65.6758	67.5140	97.9340	203.9581	0.0226
BSSSC0_052/PHZ51	7.9482	18.3026	NA	68.8543	71.5388	108.8305	243.0366	0.1989
BSSSC0_054/3IIH6	5.1769	17.0882	NA	70.4051	72.9011	117.8820	223.7682	0.1867
BSSSC0_057/3IIH6	8.3765	16.3988	NA	69.2486	71.3615	132.9919	244.8602	0.1562
BSSSC0_060/3IIH6	9.5754	16.6858	NA	68.1862	70.1836	109.7269	225.5966	0.1062
CG102/3IIH6	10.2834	17.5429	NA	68.8638	70.8253	126.7796	234.9671	0.1505
CG102/CG60	7.6194	14.0674	NA	60.7984	62.2739	91.5878	199.6326	0.0823
CG102/LH82	8.7600	16.1060	NA	63.3651	65.2553	82.8677	190.1179	0.0565
CG102/PHZ51	9.4186	16.1365	NA	65.2525	67.2472	113.3070	229.9855	0.0851
CG104/B47	7.1428	14.1481	NA	65.2011	65.8132	109.5320	225.7952	0.1338
CG104/CG102	6.8059	13.8196	NA	61.0962	61.8541	96.5065	197.7425	0.0564
CG104/LH198	8.6710	14.0821	NA	64.6794	66.3908	115.1951	220.7155	0.0661
CG104/LH82	8.3265	15.0113	NA	61.8613	63.6396	100.9440	197.7832	0.1306
CG104/PHZ51	7.4008	13.9184	NA	66.2273	68.2144	100.1632	220.5389	0.0793
CG105/B47	8.7080	12.8633	NA	63.1288	66.3651	105.5596	225.4113	0.0761
CG105/CG102	8.3862	15.1541	NA	60.1889	61.6897	88.0113	208.5765	0.1008
CG105/PHZ51	9.2237	13.5485	NA	64.0324	66.2034	102.9741	221.1801	0.0694
CG106/3IIH6	9.0259	15.3965	NA	64.4557	65.7168	98.2126	209.5725	0.0980
CG106/B47	7.3633	14.2486	NA	63.0144	66.2951	96.8473	214.9255	0.1053
CG106/PHZ51	8.3770	14.4859	NA	64.6207	67.9114	106.0655	223.0504	0.0830
CG108/B47	8.7990	15.9070	NA	63.3575	64.9743	106.2813	214.3925	0.1277
CG108/CG102	8.8393	15.0764	NA	61.6880	62.9007	104.9483	210.5752	0.0953
CG108/CG110	8.7106	15.3416	NA	59.7077	61.2165	98.9689	194.2297	0.1121
CG108/CG111	7.3810	12.9681	NA	59.5953	60.9012	99.6770	205.0800	0.1402
CG108/CGR01	8.3218	14.3448	NA	61.1410	62.6947	102.2605	204.9952	0.1318
CG108/CGR03	9.2696	15.4922	NA	62.9529	64.2462	106.3633	203.4954	0.1061
CG108/LH162	6.9421	13.2584	NA	58.9961	60.8330	94.2687	183.5814	0.1531
CG108/LH195	9.0511	23.8224	NA	69.8068	75.1531	94.2805	205.9516	0.1299
CG108/LH198	9.5595	16.2261	NA	64.9222	66.6781	93.7280	224.1502	-0.2767
CG108/LH82	7.9848	14.8477	NA	61.6615	63.2060	95.0041	187.1211	0.1148
CG108/PHZ51	8.9423	13.4659	NA	63.9586	65.6733	108.7045	219.1467	0.1370
CG110/B47	9.3013	15.5906	NA	63.2047	64.9937	102.3128	206.9345	0.0961
CG110/LH82	9.0403	15.6909	NA	63.2325	64.7718	85.4702	186.0355	0.0992
CG111/B47	7.8963	14.6733	NA	62.9287	64.3801	100.2714	217.4530	0.1696
CG118/CG44	8.1153	14.3146	NA	60.8287	63.1388	81.7995	196.6300	0.0703
CG118/CGR01	8.7384	14.9124	NA	62.2337	63.7971	95.1551	207.8095	0.0951
CG118/CGR03	9.0466	14.7778	NA	62.0645	64.1269	96.5374	204.5681	0.0772
CG118/LH198	9.1333	16.0400	NA	67.2122	69.0176	99.1259	214.9998	0.0637
CG118/LH82	9.0671	15.2793	NA	62.1031	64.1760	83.1110	188.4046	0.0874
CG118/PHZ51	8.8252	15.6696	NA	64.6151	65.9847	90.9515	219.8714	0.0811
CG119/CG102	6.1450	13.8748	NA	61.7939	64.2701	82.4912	183.5992	0.0600
CG119/CG108	7.7642	14.7639	NA	61.2324	62.0241	95.8760	189.4619	0.0848
CG119/CG44	7.8433	13.5969	NA	60.7112	63.5702	82.5080	187.0270	0.0950
CG119/LH198	8.6605	15.8127	NA	66.6222	67.0558	98.1342	212.3335	-0.0158
CG119/LH82	8.4781	15.2515	NA	62.8189	64.3677	86.9308	173.0598	0.1040
CG119/PHZ51	7.7934	16.2753	NA	65.8277	67.9527	97.6964	196.9015	0.0903
CG121/CG102	7.9071	13.7216	NA	61.6418	64.9286	87.1099	189.9000	0.0583
CG121/LH198	8.6897	15.9474	NA	66.2510	68.6508	97.5684	205.8520	0.0834
CG121/LH82	9.1177	14.9728	NA	62.9551	65.2093	88.8140	181.8641	0.0828
CG121/PHZ51	9.4973	15.8988	NA	66.4567	68.7323	92.5886	219.3623	0.0810
CG122/B47	8.6704	15.4415	NA	64.2349	65.0885	99.9783	211.4746	0.1317
CG122/CG102	7.8777	14.3982	NA	61.0211	62.2534	83.7253	200.8596	0.0784
CG122/PHZ51	8.7172	13.5702	NA	64.2461	65.6918	115.0327	224.8047	0.0960
CG123/B47	9.1125	14.9134	NA	64.1245	65.0029	107.7985	217.2290	0.1309
CG123/CG102	8.4330	14.2346	NA	60.6640	62.2845	95.9548	207.4023	0.0703
CG123/LH145	6.8975	14.6709	NA	64.6869	64.5182	107.6798	209.7772	0.1966
CG123/LH185	10.6405	15.9325	NA	67.3882	66.6288	107.8323	227.0181	0.1527
CG123/PHRE1	8.1206	14.4758	NA	63.7617	62.5121	101.7739	198.9997	0.0635
CG123/S8324	8.8795	14.8721	NA	63.7492	63.4776	98.5598	209.3182	0.1316
CG124/B47	8.4333	14.4273	NA	64.5133	65.9291	109.0933	237.5496	0.1313
CG124/LH145	6.8213	14.8552	NA	65.1485	65.1564	104.7368	227.7736	0.2374
CG124/PHHV4	10.3504	16.2922	NA	66.6260	66.2151	104.0091	243.4507	0.0709
CG124/PHRE1	8.0831	14.9059	NA	63.7557	63.6079	99.6424	218.5425	0.1162
CG124/S8324	9.1223	15.9008	NA	63.8269	64.2536	87.5455	219.3679	0.1100
CG125/B47	8.6322	15.3558	NA	63.9118	65.7309	102.4368	218.7059	0.1149
CG125/PHZ51	9.0580	14.3365	NA	64.9591	67.0140	106.9056	228.3116	0.0821
CG126/B47	8.0294	15.0128	NA	62.5202	63.5616	94.3312	213.9182	0.1159
CG127/B47	9.2384	16.2837	NA	64.3188	66.0146	104.1885	228.6171	0.1114
CG127/PHZ51	9.5004	15.6193	NA	64.8046	66.9991	116.1325	238.4929	0.0772
CG44/CG102	9.7457	14.5778	NA	62.2002	64.3615	90.7511	205.3515	0.0626
CG44/CG110	7.8085	14.6572	NA	61.3308	63.5724	94.2196	193.7754	0.0996
CG44/CGR01	8.0699	15.0594	NA	63.3948	64.9400	94.8223	201.4548	0.0960
CG44/CGR03	8.9309	14.2964	NA	62.9043	64.9061	101.8336	213.7608	0.0725
CG44/LH162	6.9722	14.1779	NA	61.2090	63.3738	86.4301	184.7468	0.0724
CG60/B47	8.5194	14.8845	NA	64.1662	65.9727	95.0864	198.1416	0.0958
CG60/CG110	7.3889	14.8154	NA	60.1916	61.7533	89.6572	186.5717	0.0920
CG60/CG111	7.6283	13.8913	NA	59.8972	61.5526	93.7458	203.5875	0.0863
CG60/LH162	6.1959	15.1875	NA	61.3961	62.2300	86.9081	184.3668	0.1093
CG60/LH185	8.7245	15.6193	NA	64.5731	64.3931	84.9815	192.2043	0.0674
CG60/LH82	7.5534	15.6357	NA	63.0624	64.0891	87.5318	188.6197	0.1373
CG60/PHZ51	8.6991	10.9512	NA	NA	NA	103.3632	214.6990	0.1000
CG65/CG102	8.1818	14.7389	NA	62.0075	63.5480	86.9095	207.4796	0.0727
CG65/CG108	8.2017	14.6934	NA	62.1047	64.0032	99.9403	208.1490	0.0854
CG65/LH185	9.1222	15.4183	NA	66.7963	67.6644	94.1324	216.8066	0.0866
CG65/LH82	8.1186	14.8510	NA	65.0310	66.3626	84.2530	194.1099	0.0661
CG65/PHZ51	8.2208	17.1294	NA	68.2756	71.6219	119.5083	250.4959	0.0833
CGR01/B47	9.8845	15.1415	NA	65.4813	66.8200	99.4121	231.8120	0.1427
CGR01/LH185	9.0688	16.5567	NA	66.8177	67.7323	88.6513	208.9023	0.0633
CGR01/LH195	11.3917	17.9572	NA	71.0888	72.9883	110.7923	231.4491	0.0677
CGR01/LH198	10.0328	17.0764	NA	67.4338	69.0987	108.8863	221.9375	0.1099
CGR01/LH82	8.7798	16.1641	NA	65.6627	66.9811	92.6891	194.9651	0.0840
CGR03/B47	10.1462	17.2628	NA	67.7243	68.6401	109.7269	219.8237	0.1170
CGR03/CG102	10.4082	14.6228	NA	64.5204	66.4683	102.7662	213.3218	0.0654
CGR03/LH185	8.6619	17.5415	NA	67.1382	68.3888	91.2889	211.1145	0.1000
CGR03/LH198	9.6285	15.6870	NA	68.9992	70.3815	112.6335	220.0951	0.0544
CGR03/LH82	9.2655	16.2073	NA	65.7333	66.8818	98.8530	200.5146	0.1126
CGR04/LH195	9.5515	18.1882	NA	70.3371	71.8056	92.2547	208.6933	0.0791
CGX333/CG102	9.1538	14.8288	NA	62.0010	63.4555	95.7521	204.7075	0.1480
CGX333/LH198	7.9215	18.7152	NA	69.9969	72.1453	97.3699	206.4782	0.1023
CGX333/LH82	7.7076	16.7757	NA	65.3309	66.1720	93.2578	197.8125	0.2622
CGX333/PHZ51	9.6133	17.0947	NA	66.7377	68.0197	105.0029	225.3850	0.1013
CH753-4/LH82	7.2525	16.9226	NA	64.8307	65.8473	78.3309	173.1029	0.1085
CH753-4/PHZ51	7.4403	16.4648	NA	67.6250	70.8067	105.7869	217.5276	0.1305
CI540/3IIH6	8.5390	15.8676	NA	70.2014	72.8808	134.6225	250.3443	0.1425
CM105/LH82	7.8469	14.6846	NA	65.8218	66.4923	79.3524	194.4736	0.0963
CM105/PHZ51	8.1134	15.9748	NA	66.7284	69.1433	109.2964	233.9566	0.1089
CML103/B47	7.7325	20.5331	NA	72.8401	73.0516	137.4539	238.1705	0.1413
CML103/LH195	10.7933	21.8037	NA	75.1014	76.3707	139.2951	241.8495	0.2687
CML103/LH82	11.4054	19.0805	NA	71.2690	71.8583	126.1048	216.6149	0.4612
CML228/B47	10.7304	20.7698	NA	75.4583	76.6052	123.2379	241.7012	0.0522
CML228/PHZ51	10.3909	21.1862	NA	75.1499	80.7145	127.5623	251.5290	0.0647
CML247/LH195	10.0616	24.2749	NA	76.0506	78.8722	120.3035	235.2640	0.0718
CML247/LH82	10.5415	21.5148	NA	72.3171	73.8297	130.1330	224.9399	0.1376
CML269/LH195	10.6074	22.2495	NA	74.9087	76.9580	122.4427	236.2385	0.1324
CML322/B47	9.3962	19.4282	NA	73.5466	75.6277	125.9655	237.2503	0.0645
CML322/PHZ51	7.7561	20.0112	NA	72.8203	78.6333	127.2602	249.6544	0.0724
CML333/B47	9.4641	20.7771	NA	73.7893	74.5260	147.1381	270.7919	0.1777
CML333/LH82	10.8236	19.6481	NA	72.0973	73.1587	128.8502	234.0168	0.2442
CML69/LH195	9.5630	22.0596	NA	74.3765	76.0272	137.2503	252.0201	0.0847
CML69/LH82	9.2347	19.4858	NA	72.6226	74.1798	116.7866	223.2194	0.5785
CO258/3IIH6	8.8991	15.9700	NA	69.3017	71.7981	113.6360	219.5587	0.0824
CUBA164:N(PHZ51)(PHZ51)-(2N)-002/LH195	8.9016	18.7465	NA	72.3688	75.0473	124.5687	236.4094	0.0807
DE811/LH82	7.7283	20.4086	NA	67.7227	69.5413	77.7233	197.5301	0.0908
DE811/PHZ51	7.4805	17.6669	NA	72.2738	74.9251	108.8654	245.8255	0.1566
DK4676A/LH82	7.9683	17.5588	NA	65.0430	66.2339	75.7947	168.0861	0.0968
DK4676A/PHZ51	9.3536	17.0916	NA	67.5701	69.7253	110.6910	243.0664	0.1905
DK78371A/B47	10.6159	17.6665	NA	69.4587	70.1277	108.9559	236.4540	0.1019
DKFBHJ/3IIH6	8.9578	15.2373	NA	67.0281	68.4342	101.9569	219.1362	0.0977
DKFBHJ/LH82	8.2976	18.5536	NA	65.2045	67.2732	81.4719	181.2739	0.0795
DKFBHJ/PHZ51	8.9345	17.3221	NA	67.7747	68.9797	105.6956	241.1575	0.0608
F42/C103	8.7167	21.0986	NA	72.0599	77.4278	121.5361	246.9585	0.0683
F42/H95	9.2053	18.7210	NA	70.9682	73.9331	115.7742	234.6949	0.0936
F42/MO17	10.0546	19.1931	NA	70.0690	73.0330	117.1011	233.1523	0.1000
F42/OH43	8.9946	19.7959	NA	68.7002	71.6896	109.2719	231.8290	0.1062
FBLA/3IIH6	9.1717	15.0935	NA	66.5168	68.0891	100.2834	222.2934	0.0894
FE/3IIH6	7.0763	15.3308	NA	69.2572	70.5996	110.5455	229.8694	0.1925
FR19/3IIH6	7.3896	15.4788	NA	68.1869	69.9259	111.4696	221.1633	0.1400
GEMN-0138/B47	9.7137	18.1228	NA	69.8514	69.9752	108.6553	231.1687	0.1457
GEMN-0144/B47	11.0090	19.3578	NA	69.2564	69.9656	120.4174	242.9479	0.0702
GEMN-0145/B47	10.2164	19.3135	NA	72.3768	73.5337	119.4744	241.3356	0.1162
GEMN-0155/B47	9.9571	18.0434	NA	69.4473	70.8527	96.9661	210.7210	0.0854
GEMN-0156/B47	10.0278	18.9641	NA	70.7114	71.9728	118.2263	226.8800	0.0722
GEMN-0178/B47	9.8864	17.9116	NA	69.5805	71.4136	122.1133	244.9717	0.1618
GEMN-0260/3IIH6	9.1905	15.9104	NA	68.5840	69.6096	108.1905	210.0834	0.0652
GEMN-0262/3IIH6	10.1348	18.3822	NA	69.3526	71.2959	116.4692	223.7755	0.0412
GEMN-0268/3IIH6	10.4587	18.0968	NA	69.8004	71.4670	125.7013	231.6129	0.0800
GEMN-0269/3IIH6	10.0705	16.8320	NA	67.7161	69.5809	112.6140	223.7513	0.1019
GEMS-0113/PHZ51	9.1536	18.6564	NA	70.0622	72.3619	121.1295	241.4785	0.1175
GEMS-0115/PHZ51	10.4539	18.6153	NA	71.7261	74.7219	130.2985	252.9537	0.2391
GEMS-0142/PHZ51	9.7535	18.3437	NA	70.5840	72.2908	111.8409	242.0238	0.0595
GEMS-0146/LH82	10.0349	18.2887	NA	68.1621	70.3509	93.9835	216.3511	0.0886
GEMS-0146/PHZ51	10.7572	18.0500	NA	70.8845	72.9912	131.1745	262.2037	0.0675
GEMS-0147/PHZ51	9.8328	18.3094	NA	72.7184	73.7697	119.3723	244.8877	0.1183
GEMS-0148/LH82	8.1432	19.1241	NA	68.8686	71.1116	100.9122	192.7879	0.0671
GEMS-0148/PHZ51	9.8265	18.3504	NA	70.9392	72.4756	117.4094	230.8590	0.0689
GEMS-0149/LH82	8.8165	19.0830	NA	68.2515	69.6840	98.8448	204.5955	0.1176
GEMS-0150/LH82	9.3032	19.0050	NA	68.8162	71.3240	110.2790	211.1261	0.1055
GEMS-0150/PHZ51	9.2089	18.5064	NA	71.6966	73.7816	129.3914	249.5725	0.1181
GEMS-0161/PHZ51	9.4465	18.1945	NA	69.8785	72.9726	98.9884	232.7322	0.0670
GEMS-0162/LH82	9.4151	20.0007	NA	67.9324	70.9000	96.4115	213.8930	0.0829
GEMS-0162/PHZ51	9.9775	18.5703	NA	71.0938	73.2026	127.9301	267.6017	0.1149
GEMS-0163/LH82	10.4529	18.3582	NA	69.5388	70.9391	110.5056	221.3182	0.1194
GEMS-0163/PHZ51	10.1341	18.1849	NA	72.6307	74.2869	139.5518	269.0499	0.1198
GEMS-0182/LH82	9.8615	18.6307	NA	67.7682	70.2964	105.2060	208.3604	0.0725
GEMS-0182/PHZ51	10.4525	17.9525	NA	70.1629	72.1516	118.2808	235.8577	0.0513
GEMS-0219/LH82	9.5763	18.0768	NA	67.7233	68.8597	98.1803	209.0825	0.0943
GEMS-0219/PHZ51	9.6643	17.8742	NA	70.4309	72.4612	121.1802	249.5340	0.0214
GT601/B47	7.5855	18.9782	NA	70.8891	73.2373	101.4029	222.4349	0.2476
GT601/PHZ51	8.9785	18.2501	NA	70.8191	73.9717	117.2506	250.8605	0.2569
GT602/B47	8.8306	18.7545	NA	72.0105	74.3557	111.7959	228.2832	0.1556
GT602/PHZ51	8.9865	18.5572	NA	70.7792	73.2159	111.9008	240.3606	0.1387
H114/B47	6.1140	19.5260	NA	71.6761	71.5620	92.1531	194.5562	0.0789
H114/LH82	7.2691	19.0660	NA	65.7714	67.6914	84.9960	175.4673	0.1319
H114/PHZ51	9.5103	18.8599	NA	NA	NA	116.7715	231.8489	NA
H122W/3IIH6	9.9273	17.6556	NA	70.1584	72.0296	127.8897	244.7405	0.1211
H84/3IIH6	10.5233	17.5573	NA	68.6769	71.2490	99.9682	219.9795	0.0913
H91/3IIH6	8.3679	15.4244	NA	69.1684	71.3181	122.9425	236.3195	0.1409
H95/B47	9.4678	18.7412	NA	70.6418	71.7389	100.8124	221.0607	0.1508
Hybrid	Predicted_Value	Predicted_Value	Predicted_Value	Predicted_Value	Predicted_Value	Predicted_Value	Predicted_Value	Predicted_Value
I159/3IIH6	8.7088	15.4661	NA	69.8037	71.6933	123.1904	234.5882	0.1586
ICI441/LH123HT	11.0001	18.8129	NA	70.2007	71.8119	115.4894	243.1380	0.0457
ICI441/LH185	12.0352	18.3182	NA	69.9805	71.9397	97.1387	224.3514	0.0566
ICI441/LH38	11.0118	18.2466	NA	67.4640	69.6579	83.4561	202.9766	0.0255
ICI441/LH51	10.8535	17.9411	NA	68.6759	71.0892	102.4135	219.1341	0.0768
ICI441/LH82	9.8335	18.0065	NA	68.0185	69.9604	89.8472	197.0259	0.0509
ICI441/PHG29	11.2704	18.0364	NA	67.9586	70.0854	96.2172	208.4212	0.0491
ICI441/PHG47	9.9224	16.3721	NA	67.2646	68.8848	88.7986	202.1379	0.0404
ICI441/PHG83	6.2617	17.3667	NA	71.6454	72.8935	101.2164	210.1792	0.0495
ICI441/PHK56	10.5290	16.9246	NA	68.5575	71.4017	90.5672	214.1602	0.0404
ICI441/PHK76	9.5788	17.8943	NA	67.7666	69.1652	99.8047	214.7399	0.0925
ICI441/PHN82	11.4599	18.4767	NA	69.4730	72.2200	99.2800	213.8168	0.0274
ICI441/PHW30	12.2105	18.0588	NA	68.9343	71.1561	105.5267	229.1603	0.0205
ICI441/PHZ51	9.9672	17.2652	NA	68.2171	70.4638	105.1648	230.5444	0.0375
ICI441/Q381	9.6730	17.9635	NA	67.6712	70.2524	97.0068	210.6914	0.0381
ILL.HY/3IIH6	7.8964	16.9748	NA	69.3828	72.0241	121.4892	237.0462	0.2008
KY21/B47	7.9876	18.5035	NA	73.2253	76.4111	118.6099	235.9345	0.3433
KY21/LH195	8.6917	20.1493	NA	76.4023	78.3408	129.7470	243.7380	0.2412
LAMA2002-12-1-B-B-B-B-B-B-1-B28-B14/LH195	9.9505	23.2480	NA	75.8067	77.8351	122.5064	243.2835	0.1192
LAMA2002-58-3-B-B-B-B-B-B-1-B19-B18-B22/LH195	10.5807	23.0370	NA	76.5003	78.7671	125.3970	235.6908	0.0447
LH123HT/3IIH6	9.5783	17.8923	NA	70.7684	72.5779	122.9958	246.0671	0.1096
LH132/LH195	6.6961	18.8407	NA	74.3886	73.7412	85.9818	190.0273	0.0761
LH132/LH51	10.3997	19.2267	NA	70.2432	72.3457	114.6218	231.6498	0.0895
LH132/LH82	9.2786	18.9387	NA	67.5957	69.6006	88.8191	199.7052	0.0872
LH132/PHP02	9.7842	18.2911	NA	66.6812	69.8841	102.8433	212.6429	0.0297
LH132/PHZ51	9.7167	17.4149	NA	70.7813	74.0425	112.8611	235.6855	0.1105
LH145/3IIH6	8.4508	14.8486	NA	66.2344	68.1212	106.3233	221.0012	0.1318
LH145/LH162	6.0205	14.7494	NA	63.4894	63.7042	91.2805	194.6702	0.1147
LH145/PHR25	6.7854	14.7183	NA	62.8329	63.2140	85.6758	199.8742	0.0808
LH145/PHZ51	8.4487	15.9140	774.5731	68.3900	69.9253	118.6510	241.2694	0.1220
LH146HT/LH82	8.9518	16.1256	NA	64.4440	66.4110	92.3334	203.3763	0.0722
LH146HT/PHZ51	8.0380	16.4179	NA	67.1512	70.6187	112.9176	235.9998	0.1352
LH149/3IIH6	8.9935	15.1447	NA	65.6253	67.3968	103.4169	209.9806	0.0561
LH149/LH82	7.8376	17.7279	NA	65.4562	66.1023	86.5850	187.0389	0.0809
LH149/PHZ51	8.4773	17.6517	NA	68.6095	71.4486	107.9656	233.7488	0.0963
LH162/CG102	5.9427	14.0698	NA	60.3516	62.5123	91.8542	206.1012	0.0940
LH162/LH198	7.0324	15.6603	NA	66.2068	68.7966	97.5827	204.5248	0.0886
LH162/PB80	NA	NA	NA	68.1346	70.0645	87.3677	206.6254	0.0347
LH184/B47	7.8207	NA	NA	68.1452	70.0369	109.2161	217.0215	0.0105
LH185/LH145	9.4698	15.3115	NA	66.6611	67.2774	89.3531	211.4291	0.0723
LH185/PHRE1	10.0131	16.5726	NA	65.5178	65.5325	93.5517	202.9055	0.0389
LH185/S8324	10.1407	16.9542	NA	66.1174	67.8461	88.3148	211.3248	0.0973
LH195/3IIH6	8.7527	17.6802	NA	70.2140	71.9860	101.3093	214.7175	0.0630
LH195/LH123HT	11.4330	19.6222	NA	73.1953	74.7984	120.0053	249.1427	0.0639
LH195/LH185	10.8371	18.8207	NA	71.6018	73.0263	101.4794	219.4273	0.0713
LH195/LH198	7.4038	18.3472	NA	74.3802	76.3854	103.0885	218.3184	0.0160
LH195/LH210	11.1625	19.4115	NA	72.8462	75.1369	123.0381	240.8866	0.0487
LH195/NK787	11.1686	21.6101	NA	73.1026	75.4158	112.0021	242.4203	0.0682
LH195/PHG29	10.3555	18.4513	NA	69.3405	72.0525	101.8992	213.9006	0.0467
LH195/PHG47	9.9133	16.6656	NA	70.1521	71.6401	93.5750	205.2193	0.0252
LH195/PHG83	6.8269	19.1281	NA	74.0878	74.8473	99.6167	199.9265	0.0587
LH195/PHJ65	10.3822	20.8921	NA	75.3165	77.5846	115.0442	245.1639	0.0777
LH195/PHK56	10.5729	18.6041	NA	70.4747	72.9779	96.4483	216.6143	0.0421
LH195/PHK76	9.0907	18.3009	NA	69.7770	71.3836	95.0308	203.4203	0.0822
LH195/PHM49	9.8917	19.2621	NA	73.7670	76.3583	107.1016	226.8266	0.0488
LH195/PHN37	10.1703	NA	NA	NA	NA	110.0612	247.2390	0.0477
LH195/PHN47	11.2036	21.1928	NA	74.9908	77.3091	121.8496	241.6860	0.0590
LH195/PHN82	10.2711	19.4058	NA	71.7458	74.5221	100.3835	208.9665	0.0335
LH195/PHP02	11.2677	16.7911	NA	68.1150	70.1887	104.2752	211.3002	0.0395
LH195/PHP60	10.8011	20.1555	NA	73.1215	74.7958	110.5989	234.3805	0.0732
LH195/PHR03	10.2244	20.6047	NA	74.8892	77.3408	115.7147	246.3344	0.0717
LH195/PHR63	10.3012	20.8301	NA	70.8888	73.2812	108.7979	217.1722	0.0609
LH195/PHW30	10.6849	18.9727	NA	71.6558	73.9122	108.8574	232.0306	0.0483
LH195/PHW53	10.2416	19.2560	NA	72.6021	75.1351	109.9276	224.8196	0.0343
LH195/PHZ51	9.3524	18.3405	742.0884	72.2736	73.9322	113.8975	234.7738	0.0808
LH195/Q381	8.9432	18.4687	NA	69.5646	72.2026	100.4079	206.1345	0.0146
LH195/TX777	10.2928	18.9246	NA	73.2227	75.0649	117.9497	240.9174	0.0623
LH198/3IIH6	11.1010	16.0021	NA	68.1768	69.6358	107.2632	223.3145	0.0800
LH198/LH123HT	11.6862	19.1349	NA	71.5456	73.8410	120.0860	253.6480	0.0588
LH198/LH185	11.8133	17.8981	NA	70.2196	71.8609	109.9619	231.4664	0.0572
LH198/LH38	11.4706	17.8941	NA	68.4051	70.9652	98.0798	216.6498	0.0287
LH198/LH51	10.8627	17.5954	NA	68.7169	71.1105	104.3723	225.7114	0.1096
LH198/PHG29	10.9998	17.4097	NA	67.3107	70.2106	105.3519	220.2177	0.0748
LH198/PHG47	10.5607	16.5941	NA	67.9163	69.7402	95.9752	207.0266	0.0267
LH198/PHG83	6.6080	17.6527	NA	72.3949	74.1316	98.2142	203.7810	0.0347
LH198/PHK56	11.9670	17.8210	NA	69.2353	71.2816	98.6077	222.5611	0.0248
LH198/PHK76	9.8863	17.3428	NA	67.9441	69.2391	100.5222	216.8135	0.0651
LH198/PHN82	12.6168	18.1375	NA	69.7245	72.2082	103.6925	216.6908	0.0367
LH198/PHW30	11.8439	17.9127	NA	69.3871	72.0972	109.4771	234.7989	0.0462
LH198/PHZ51	9.9406	17.4084	NA	69.9243	72.1075	117.1312	241.5452	0.0557
LH198/Q381	9.6526	17.5848	NA	67.8654	70.8663	106.3103	211.2489	0.0365
LH205/3IIH6	9.9231	15.5143	NA	67.7701	68.8168	104.6011	223.5100	0.0532
LH209/3IIH6	9.7431	15.8356	NA	66.4311	68.0187	97.2876	215.1842	0.0660
LH212HT/LH195	10.4421	19.0523	NA	73.0391	74.8098	119.3965	238.1039	0.0863
LH212HT/PB80	9.9384	19.1020	NA	70.0100	71.5821	111.3848	231.2737	0.0731
LH216/LH195	10.7735	20.1936	NA	73.7628	76.1850	117.7577	233.8471	0.0598
LH220HT/3IIH6	9.1030	15.3163	NA	66.7284	68.2027	94.8158	207.9558	0.0945
LH222/3IIH6	8.4303	15.2696	NA	66.6613	68.1163	98.0710	211.6363	0.0735
LH38/B47	9.3355	17.3121	NA	67.3182	68.3507	85.6943	206.7838	0.0901
LH38/LH195	10.0003	19.0229	NA	70.9695	73.0097	95.6827	207.7851	0.0640
LH38/PB80	9.9452	18.9578	NA	68.6770	71.8903	100.0625	211.8125	0.0468
LH51/B47	10.3417	17.3660	NA	68.5314	70.3697	105.6305	220.9345	0.0934
LH51/LH195	10.8471	19.5225	NA	71.9246	74.1823	112.9316	225.7620	0.0659
LH51/PB80	10.0196	19.8729	NA	70.9481	72.8533	121.0999	234.8867	0.0854
LH57/B47	9.2711	16.6812	NA	65.8041	67.4487	89.0286	206.2006	0.0251
LH57/LH195	8.7542	20.0012	NA	69.9653	71.4396	88.1267	204.6644	0.0323
LH57/PB80	9.1704	18.7951	NA	67.3175	69.9256	94.3208	207.5121	0.0737
LH59/PB80	10.3411	18.9667	NA	69.7051	71.2141	109.9248	222.8552	0.0461
LH61/B47	8.8291	17.1168	NA	65.4315	68.0997	97.9926	198.9733	0.1571
LH61/LH195	9.3000	18.8424	NA	70.4740	72.4876	96.0919	209.3566	0.0830
LH61/PB80	8.5279	19.0272	NA	66.2967	69.0595	92.0985	205.0679	0.0500
LH74/PHG35	9.2541	16.7834	NA	69.7611	71.0433	106.9665	215.8124	0.0997
LH74/PHM49	9.3602	18.0491	NA	69.6263	71.2686	104.0509	211.9776	0.0714
LH74/PHN82	9.7464	17.9126	NA	69.4190	71.0966	104.1544	211.2179	0.0680
LH74/TX205	10.4790	17.4433	NA	71.0846	72.6585	115.1732	229.5557	0.1585
LH82/B47	8.9494	17.2672	NA	66.8190	68.0362	89.6459	199.0541	0.0854
LH82/LH145	8.9936	15.3970	NA	65.6989	67.1499	95.6510	208.3139	0.1141
LH82/LH195	9.0565	18.9812	NA	70.1516	72.3453	90.8792	196.3533	0.0621
LH82/LH198	7.4655	17.1879	NA	67.9282	69.4973	89.4165	186.9581	0.1024
LH82/S8324	9.4208	16.6007	NA	65.4858	66.2821	85.7451	187.8757	0.0583
LH82/TX777	7.1737	21.3908	NA	71.7966	73.7155	114.4206	228.1907	0.1900
LH82_PH207-10/B47	9.4976	17.2993	NA	66.2793	68.2124	95.4612	202.5508	0.0695
LH82_PH207-11/B47	9.0127	16.9273	NA	66.5243	67.3124	99.1864	208.9406	0.0920
LH82_PH207-12/B47	9.4125	16.8986	NA	66.0319	68.2370	89.5728	207.6352	0.0751
LH82_PH207-13/B47	9.4015	17.3220	NA	67.5085	68.8273	88.1222	198.8483	0.0698
LH82_PH207-14/B47	9.6191	18.2450	NA	66.0638	67.4452	95.1219	196.8761	0.1241
LH82_PH207-15/B47	9.3526	18.3378	NA	68.3021	69.8902	107.8264	226.4997	0.1407
LH82_PH207-16/B47	8.5450	16.8029	NA	65.5754	67.1409	89.6719	195.2085	0.0737
LH82_PH207-17/B47	8.5818	14.8803	NA	67.1150	68.2345	105.3793	222.0064	0.1134
LH82_PH207-18/B47	8.5391	15.6554	NA	66.9682	68.3372	98.4285	215.8219	0.0686
LH82_PH207-2/B47	9.0485	17.1255	NA	67.3095	68.3393	97.9916	216.9031	0.1030
LH82_PH207-20/B47	8.1123	16.8070	NA	65.9363	67.4370	90.3061	201.3725	0.0877
LH82_PH207-22/B47	8.8170	16.7081	NA	65.6840	66.9931	76.3540	193.4731	0.0675
LH82_PH207-23/B47	9.5414	17.8940	NA	68.0616	69.2312	98.4999	203.1893	0.0949
LH82_PH207-24/B47	9.7519	16.6729	NA	67.2073	68.9350	99.6330	217.0032	0.0999
LH82_PH207-25/B47	8.9169	16.1057	NA	66.5607	67.9785	84.4124	195.1442	0.0755
LH82_PH207-4/B47	9.6961	16.6707	NA	66.7894	68.2489	107.2594	219.7016	0.0968
LH82_PH207-5/B47	9.9494	16.4314	NA	66.8280	67.5266	101.7181	219.0370	0.0815
LH82_PH207-8/B47	8.4600	15.8209	NA	65.4635	66.8936	94.3077	209.8407	0.1714
LH82_PH207-9/B47	9.2459	15.4591	NA	65.2655	66.1133	95.4587	206.6095	0.1261
LH82_PHG47-1/B47	9.5338	15.6493	NA	65.0737	66.4031	90.4685	207.6869	0.0878
LH82_PHG47-10/B47	9.0818	16.3660	NA	67.1456	66.9611	98.7416	205.5591	0.1171
LH82_PHG47-11/B47	10.6065	16.9463	NA	67.1201	67.2635	103.3615	220.8822	0.0973
LH82_PHG47-12/B47	9.4250	17.0111	NA	65.6715	66.6615	97.3594	211.2569	0.1099
LH82_PHG47-13/B47	8.9071	16.9445	NA	65.4633	66.5129	94.9711	206.3309	0.1108
LH82_PHG47-14/B47	9.1461	16.7086	NA	67.4481	68.4367	96.0305	215.0485	0.1179
LH82_PHG47-15/B47	9.9701	17.7548	NA	67.5278	68.6724	95.7524	221.0123	0.1256
LH82_PHG47-16/B47	8.5135	16.6419	NA	65.7253	66.7523	83.3044	192.6295	0.0981
LH82_PHG47-17/B47	10.9436	16.8473	NA	68.7185	69.6913	105.7367	219.1009	0.0759
LH82_PHG47-18/B47	8.8764	16.3220	NA	65.5384	65.7107	99.7218	206.9307	0.1491
LH82_PHG47-19/B47	8.8700	15.6428	NA	66.5476	66.3487	99.1780	216.1870	0.1039
LH82_PHG47-2/B47	9.3197	16.3347	NA	66.8849	67.6756	99.7982	207.8270	0.1151
LH82_PHG47-20/B47	9.2574	15.7562	NA	64.8773	66.1107	89.5282	206.2929	0.1331
LH82_PHG47-21/B47	9.5318	16.2895	NA	67.6724	68.3116	104.6647	221.2712	0.1310
LH82_PHG47-22/B47	9.0800	16.8329	NA	68.2837	68.7357	89.9613	205.5508	0.1064
LH82_PHG47-23/B47	8.8787	16.3549	NA	65.0579	66.0436	89.9358	195.8043	0.1181
LH82_PHG47-24/B47	7.2328	16.4577	NA	65.5047	67.2896	89.7552	204.6286	0.1405
LH82_PHG47-25/B47	7.7447	17.0892	NA	67.9538	69.7287	83.8533	194.6011	0.0948
LH82_PHG47-3/B47	9.2638	15.8747	NA	66.5934	67.5893	85.1884	207.6958	0.1097
LH82_PHG47-4/B47	8.8263	16.0780	NA	65.9678	65.8659	90.6282	205.4780	0.1239
LH82_PHG47-5/B47	9.1631	16.4276	NA	66.7472	67.6892	101.1539	207.9626	0.1189
LH82_PHG47-6/B47	9.8953	15.7819	NA	66.8780	68.3362	107.8369	221.6099	0.0993
LH82_PHG47-7/B47	9.9804	16.2728	NA	66.3236	66.8957	93.5689	204.7830	0.0725
LH82_PHG47-8/B47	9.7373	16.0490	NA	67.9890	68.1190	98.1943	217.2713	0.1080
LH82_PHG47-9/B47	7.9946	14.7342	NA	64.8105	66.0180	96.0906	209.6036	0.1299
M0001/LH185	9.2088	16.6412	NA	68.9237	71.0856	93.7720	211.3514	0.0912
M0001/LH195	8.9655	19.2296	NA	73.1753	75.3176	105.7903	213.7888	0.0826
M0001/LH198	7.4874	17.1943	NA	71.4103	74.0130	103.1730	208.3696	0.1162
M0001/LH82	9.0425	16.9796	NA	67.5473	69.2732	91.5647	203.1786	0.0978
M0001/PB80	8.4608	19.0744	NA	70.6562	73.5482	110.5307	211.4903	0.0840
M0001/PHZ51	8.2357	19.1823	NA	69.7674	72.4959	101.8818	236.5351	0.0669
M0007/LH195	10.4037	21.1583	NA	73.2390	74.8652	110.5689	222.6661	0.0675
M0007/PB80	9.0879	18.6593	NA	70.0032	72.4392	108.3690	219.5006	0.0933
M0008/CG102	9.5440	16.5405	NA	64.9477	67.3362	94.7919	216.7987	0.0709
M0008/LH185	9.6745	18.9355	NA	69.6859	71.3772	95.1251	216.0623	0.0860
M0008/LH195	8.0693	19.0089	NA	76.4386	76.8757	100.3174	209.9233	0.0733
M0008/LH198	8.3722	18.6559	NA	71.6384	73.3704	107.2259	213.6179	0.0722
M0008/LH82	8.7956	17.7506	NA	66.9356	68.2139	93.3403	194.4408	0.1070
M0008/PB80	8.5966	19.8108	NA	71.9380	73.9754	111.7103	217.1657	0.0742
M0008/PHZ51	8.9932	17.6831	NA	69.4478	73.0859	117.9363	242.1487	0.0938
M0010/LH195	10.1114	19.3597	NA	73.1038	74.8033	120.0785	240.2184	0.0733
M0010/PB80	7.9930	18.6941	NA	71.4518	73.2273	117.7717	232.8472	0.1537
M0012/CG102	9.4611	16.5459	NA	63.3462	66.0749	98.5276	216.8862	0.0776
M0012/LH185	9.1628	18.7266	NA	68.0088	70.3078	96.9572	216.2885	0.0816
M0012/LH198	8.2982	18.6515	NA	70.6532	72.3518	109.5403	213.8996	0.1083
M0012/LH82	8.1123	19.1008	NA	65.7700	67.5306	85.3585	194.7172	0.1044
M0012/PHZ51	8.9039	17.8772	NA	70.4667	72.1141	108.9793	236.4408	0.1118
M0014/CG102	8.9676	16.3880	NA	63.4887	66.2633	94.0234	206.4662	0.0677
M0014/LH185	8.5787	18.6203	NA	67.8472	69.8897	85.5944	205.4114	0.0537
M0014/LH198	8.5835	18.3456	NA	70.1645	72.7241	104.7737	207.9874	0.0586
M0014/LH82	7.9641	18.4741	NA	65.4467	68.6010	79.7031	178.7767	0.0748
M0014/PB80	8.4698	19.1621	NA	69.6677	71.5676	103.2361	212.5997	0.0506
M0014/PHZ51	9.6426	17.8016	NA	69.7246	71.3956	111.2913	223.0920	0.0583
M0015/CG102	10.3205	17.0785	NA	65.6312	67.7132	106.7813	223.2028	0.0820
M0015/LH195	9.1429	20.5397	NA	74.3255	76.6350	110.3409	226.9959	0.1931
M0015/LH198	7.3719	19.0356	NA	71.2589	74.0434	107.4571	210.2233	0.1002
M0015/LH82	8.4287	17.6502	NA	66.0018	67.4495	88.2926	193.6494	0.1275
M0015/PB80	8.6632	18.8704	NA	73.0847	75.1185	112.8604	214.6431	0.1160
M0015/PHZ51	8.0898	17.9650	NA	68.5354	70.4528	122.5345	239.9136	0.1599
M0016/LH195	8.5212	18.7070	NA	74.3475	75.9605	100.0991	207.6101	0.0461
M0016/PB80	8.5994	19.0058	NA	71.5119	73.1719	109.4643	217.1626	0.0918
M0022/CG102	9.0778	16.0296	NA	66.4934	68.3752	112.5570	225.0770	0.0771
M0022/LH185	9.6095	17.5942	NA	70.2013	72.0617	97.2094	216.1598	0.0782
M0022/LH198	6.8086	18.2845	NA	72.8508	75.1508	108.5282	215.1334	0.1110
M0024/CG102	8.2859	15.3906	NA	65.1556	67.6086	118.0528	233.9077	0.1079
M0024/LH185	9.4509	17.5266	NA	69.5015	71.0110	108.8774	229.4692	0.1146
M0024/LH198	7.4340	17.0975	NA	71.6767	73.6959	121.7254	235.7398	0.0815
M0024/LH82	8.5404	16.7719	NA	67.9101	70.0982	103.3152	212.7659	0.1576
M0024/PHZ51	9.4599	16.9914	NA	70.3954	71.6702	124.6622	252.6705	0.1423
M0027/CG102	8.7089	14.9970	NA	61.4612	64.1471	88.2143	208.9580	0.0789
M0027/LH185	9.6054	18.0808	NA	66.6744	68.6387	89.2206	217.2574	0.0598
M0027/LH198	8.3663	17.5669	NA	69.1816	71.9495	108.8958	217.2788	0.0854
M0028/CG102	9.2550	15.8161	NA	65.0031	67.6120	109.8510	220.8894	0.0807
M0028/LH185	9.0722	17.5077	NA	69.5489	71.3634	98.7342	216.7410	0.0937
M0028/LH195	6.6628	18.5365	NA	74.4008	76.5075	102.8621	210.1209	0.2722
M0028/LH198	8.7500	17.0460	NA	71.0728	73.7231	110.1833	214.6665	0.0912
M0028/LH82	7.8682	17.2145	NA	66.6100	70.1029	84.8280	187.9898	0.1556
M0028/PB80	8.5624	18.6971	NA	70.5562	71.9294	110.3605	214.7486	0.0981
M0028/PHZ51	9.5470	17.6491	NA	69.8694	72.6796	118.1361	240.2265	0.1526
M0029/PB80	8.0827	18.8882	NA	72.8765	74.5509	101.3884	207.7270	0.0832
M0030/CG102	8.8228	15.6308	NA	66.0438	67.7606	107.0120	213.2589	0.0795
M0030/LH185	10.1112	17.9893	NA	68.9156	71.4059	99.9182	213.8736	0.0963
M0030/LH195	9.0035	18.2827	NA	75.2336	77.6906	101.7266	197.9321	-0.0372
M0030/LH198	8.3851	18.0676	NA	70.9898	73.5151	109.2177	212.2086	0.0707
M0030/LH82	9.6093	16.1855	NA	67.6955	69.6710	100.6443	209.0179	0.0994
M0030/PB80	9.0653	18.6917	NA	71.4994	73.9685	120.9198	221.4256	0.1005
M0030/PHZ51	9.3674	17.4485	NA	68.9792	71.4331	116.4141	235.6401	0.0829
M0031/LH195	9.2404	19.0507	NA	75.5666	77.3886	109.9065	235.8137	0.0546
M0031/PB80	9.1816	18.6369	NA	72.8569	74.5319	113.9020	231.1884	0.0896
M0033/CG102	7.6837	14.3299	NA	66.3326	69.1776	99.7778	208.3096	0.0867
M0033/LH185	8.8435	18.6372	NA	71.1142	72.3938	98.4875	206.1690	0.0487
M0033/LH195	9.6190	21.2768	NA	73.8545	76.4619	111.7883	228.0016	0.1364
M0033/LH198	8.6895	19.1788	NA	71.5394	74.5109	114.2860	215.9134	0.0862
M0033/LH82	9.6963	17.9848	NA	66.8117	69.1756	99.5364	206.5696	0.1726
M0033/PB80	7.8225	19.5297	NA	71.9735	74.4248	112.5817	223.3206	0.1195
M0033/PHZ51	10.1392	18.5498	NA	70.2087	72.6020	127.8639	246.6781	0.0563
M0035/CG102	9.2972	15.9353	NA	62.6384	65.1141	90.1450	202.3027	0.0690
M0035/LH185	8.4926	15.8731	NA	68.6841	71.0129	96.4774	212.4826	0.0913
M0038/CG102	9.9567	15.7736	NA	64.8099	66.8129	96.3035	206.5517	0.0815
M0039/CG102	10.1094	15.8483	NA	65.7635	65.7309	110.7949	226.7478	0.0620
M0039/LH185	8.6583	17.8023	NA	68.7734	70.2576	100.3198	215.9352	0.0795
M0039/LH195	8.4652	19.4856	NA	74.1265	76.1809	113.8168	227.5878	0.0748
M0039/LH198	6.8915	18.1932	NA	71.1918	74.1847	115.3350	215.6328	0.1154
M0039/LH82	8.9162	17.5124	NA	67.7428	69.7601	97.1884	212.4381	0.1127
M0039/PB80	8.5571	18.6381	NA	72.1342	73.7345	110.7595	222.2006	0.0775
M0039/PHZ51	8.8149	18.2298	NA	69.3959	70.9673	118.3896	245.2322	0.0723
M0041/CG102	9.8010	15.0194	NA	64.7855	67.7309	110.7243	235.4171	0.0946
M0041/LH185	9.5151	16.5477	NA	68.0525	70.6326	103.9814	226.6158	0.0738
M0041/LH198	7.6819	17.1117	NA	71.8820	74.7824	116.2550	231.3655	0.1063
M0041/LH82	8.4802	16.7623	NA	66.8120	68.6776	105.1964	201.1398	0.2238
M0041/PHZ51	8.6674	16.7077	NA	68.5959	70.9534	119.1566	238.9258	0.0957
M0042/LH185	9.6603	18.2042	NA	70.2908	72.5363	99.1621	209.0730	0.0944
M0045/LH185	9.8043	21.7717	NA	67.6835	69.8623	97.1884	212.9547	0.0578
M0045/LH198	7.7386	20.3493	NA	70.9446	74.4042	106.5993	206.6659	0.1012
M0048/PB80	9.0165	18.8026	NA	75.0445	77.3137	115.6170	228.1865	0.0940
M0051/CG102	8.8339	15.5015	NA	63.6277	66.7864	97.6475	216.6411	0.1362
M0051/LH185	9.5285	16.6486	NA	68.7860	70.1705	92.1501	213.5330	0.0786
M0051/LH198	8.5063	17.1562	NA	70.3824	72.8709	108.8362	218.2429	0.0858
M0052/CG102	9.2688	16.1109	NA	64.0107	66.8977	105.6250	218.7360	0.0737
M0052/LH185	8.8195	18.4682	NA	67.9495	70.5417	90.8032	211.8179	0.1042
M0052/LH82	8.9805	18.4399	NA	66.7265	68.6905	99.3836	197.5517	0.1418
M0052/PB80	8.5993	19.0553	NA	71.4856	73.6249	106.2254	217.6523	0.1736
M0052/PHZ51	8.9404	17.0987	NA	68.0544	71.5067	106.4217	221.2438	0.0707
M0056/PB80	8.7877	20.1843	NA	72.6585	75.5144	122.9293	219.6998	0.0943
M0057/LH195	9.5634	20.5228	NA	75.7466	77.5086	111.1391	234.7459	0.1614
M0058/CG102	8.9949	15.3854	NA	63.5798	65.9319	105.0614	225.6554	0.0766
M0058/LH185	9.9344	19.3321	NA	68.7044	70.7536	98.2066	220.4427	0.0914
M0058/LH195	9.5344	20.4020	NA	73.0854	74.9924	106.8555	220.4502	0.0482
M0058/LH198	7.2283	18.4129	NA	69.9633	73.0516	106.2428	209.8254	0.1234
M0058/LH82	9.2252	18.4830	NA	67.3088	69.4917	91.3368	198.0272	0.1560
M0058/PHZ51	9.5635	18.4935	NA	71.5694	73.4153	112.8444	233.5666	0.1617
M0061/LH198	7.2901	18.1054	NA	70.1649	73.6409	105.9305	210.4725	0.0915
M0062/CG102	9.8037	15.6527	NA	63.4629	65.4695	99.3131	200.9136	0.0833
M0062/LH198	7.0832	17.5852	NA	70.7704	73.3361	101.1890	205.5427	0.0579
M0066/LH195	9.5612	20.0756	NA	73.6008	75.6916	103.4942	209.6950	0.0406
M0067/CG102	10.3655	15.4690	NA	64.7685	67.3046	111.8574	228.3027	0.1011
M0075/CG102	8.9912	15.9254	NA	64.6384	66.1261	108.3274	215.6575	0.0829
M0075/LH185	8.1648	17.5529	NA	69.0381	70.2874	91.9183	209.4881	0.1169
M0075/LH195	7.6264	18.0443	NA	74.5092	76.1199	105.2595	218.8267	0.1417
M0075/LH82	8.6564	18.2402	NA	67.5569	69.8222	89.3001	189.5528	0.1632
M0075/PB80	8.7564	18.4682	NA	70.8289	72.2673	110.5049	216.1905	0.0894
M0076/CG102	11.0021	15.3476	NA	65.0132	68.1077	115.4150	226.3891	0.0806
M0076/LH185	9.9686	17.8080	NA	69.2637	70.9872	100.8997	217.2252	0.0643
M0077/LH185	8.8598	18.6106	NA	71.9061	72.2491	98.1552	216.1504	0.0682
M0077/LH198	9.3582	19.8161	NA	73.4682	75.7547	118.5496	233.0518	0.0865
M0077/LH82	9.6920	19.4983	NA	69.0271	70.9537	100.1061	209.6114	0.1256
M0077/PHZ51	9.2676	18.8707	NA	70.8887	74.0320	121.9982	238.3058	0.0983
M0083/CG102	9.6991	15.7086	NA	64.4865	67.1869	102.0662	214.0157	0.0630
M0083/LH185	9.7357	17.3687	NA	68.0784	69.8506	91.3112	202.2874	0.0575
M0083/LH198	8.0920	17.5311	NA	70.4082	73.1330	106.0953	206.5322	0.0686
M0083/LH82	9.3748	18.1033	NA	64.2853	66.4114	86.5259	185.1024	0.0942
M0083/PHZ51	9.7112	16.4172	NA	68.2398	70.3856	108.6813	224.9614	0.0718
M0087/CG102	9.1441	14.3991	NA	61.7792	63.7592	99.0650	207.8368	0.0810
M0087/LH185	10.1857	17.6111	NA	68.0626	70.4749	99.1479	225.9044	0.0871
M0087/LH198	8.3562	17.8100	NA	68.8663	71.1865	103.5400	212.9455	0.1276
M0088/LH185	9.3169	18.4289	NA	69.8505	71.5381	102.7730	219.2587	0.0787
M0088/LH82	8.0539	18.0318	NA	65.8609	66.4796	86.3894	193.7599	0.1886
M0088/PHZ51	9.0212	17.7005	NA	68.1981	70.3263	120.6631	241.1744	0.2142
M0092/CG102	9.1414	14.2408	NA	63.1304	65.8471	106.6065	221.8424	0.1063
M0099/LH185	9.3936	18.3671	NA	71.0806	73.1325	113.3909	229.7583	0.0762
M0099/LH195	10.8320	20.3724	NA	75.6672	77.9863	129.8251	248.8874	0.0618
M0099/PB80	10.3615	19.2200	NA	73.4420	75.6354	125.1478	242.3318	0.0567
M0101/CG102	9.4846	14.5292	NA	65.4932	67.6965	121.1293	229.3663	0.1487
M0101/LH185	9.6813	16.7808	NA	68.5733	70.0361	101.5609	220.3144	0.1143
M0101/LH198	8.9267	17.3649	NA	70.7788	73.3017	119.9759	224.7877	0.1216
M0101/LH82	9.2635	16.9475	NA	67.0304	68.9971	101.4558	206.7561	0.1412
M0101/PHZ51	8.9775	16.1095	NA	68.8968	71.9629	108.7987	235.0464	0.1108
M0106/LH185	9.9971	18.1390	NA	68.6664	72.0646	95.1695	219.5043	0.0809
M0106/LH198	8.2423	18.8085	NA	70.8094	73.9108	108.4882	223.3758	0.1330
M0116/LH185	8.7566	17.3075	NA	69.6190	71.7526	104.7106	232.5898	0.0821
M0116/LH82	8.5627	17.1077	NA	66.4163	68.2858	89.0143	209.0525	0.1282
M0116/PHZ51	9.2423	17.3938	NA	69.6501	72.6174	120.5572	259.4024	0.0639
M0118/LH185	9.9553	19.0859	NA	68.9189	70.8501	96.2052	211.0014	0.0802
M0118/LH198	7.7164	18.3974	NA	71.4413	73.6343	112.5963	208.1717	0.0914
M0118/LH82	8.3377	18.1808	NA	66.4177	67.3721	93.0521	195.9539	0.1619
M0118/PHZ51	9.5788	17.7441	NA	68.8415	71.5515	106.3311	224.8029	0.0927
M0127/LH195	9.9362	19.8927	NA	74.2095	75.7495	108.4280	225.6194	0.0494
M0141/LH185	10.1959	20.6991	NA	71.4077	72.8327	111.1625	229.5297	0.0651
M0143/LH185	9.4130	19.4779	NA	68.9530	71.2274	103.5820	211.3584	0.0819
M0143/LH195	9.3641	20.1428	NA	75.0481	77.2227	113.4801	227.2535	0.1177
M0143/LH198	8.6463	19.7043	NA	71.6723	74.6272	120.5912	219.5654	0.1152
M0143/LH82	8.1322	19.8987	NA	66.0292	68.5432	89.5848	185.5634	0.0898
M0143/PB80	8.8621	19.2144	NA	72.1175	74.7059	117.2196	222.1262	0.1336
M0143/PHZ51	10.0294	18.4449	NA	69.2761	71.9978	118.7268	229.0211	0.1086
M0151/LH185	8.9446	17.6036	NA	69.0424	71.2077	95.0982	210.8302	0.0870
M0151/LH198	6.9154	18.2448	NA	70.4347	73.2952	103.9403	211.5594	0.0835
M0154/CG102	9.9225	15.8218	NA	62.7342	65.5864	98.8924	212.2036	0.0703
M0154/LH185	8.8617	17.5719	NA	67.6716	70.0588	94.4873	208.0108	0.1021
M0154/LH195	10.0022	19.8517	NA	73.1436	75.2227	109.7596	222.5467	0.0542
M0154/LH198	8.9437	18.6945	NA	69.6876	72.3192	106.3882	212.9673	0.0743
M0154/LH82	8.2325	17.6279	NA	66.8245	69.8552	90.7023	203.5380	0.1005
M0154/PHZ51	8.9418	18.0198	NA	69.8523	73.4162	105.4589	244.3858	0.0964
M0159/LH185	9.5158	18.2652	NA	69.9718	73.7796	104.4111	210.4885	0.0810
M0159/LH198	6.2904	18.4260	NA	73.8117	77.4265	112.1531	214.5562	0.1287
M0159/PHZ51	8.4410	18.1670	NA	70.1578	73.2523	107.2034	230.8193	0.0661
M0162/PB80	9.9382	18.9768	NA	73.2665	74.5211	132.0449	231.0011	0.0496
M0163/LH185	9.2507	17.9660	NA	70.9023	72.5161	98.1320	211.6199	0.0545
M0163/LH82	9.3148	18.0010	NA	66.8631	68.9894	86.2616	186.3568	0.0949
M0163/PHZ51	10.3645	18.4550	NA	70.1066	72.1382	128.4940	237.2951	0.1189
M0164/LH195	9.7424	20.3708	NA	75.9167	77.7146	112.9345	236.8213	0.0352
M0164/PB80	9.6466	19.1563	NA	73.3380	74.4356	113.2790	231.2503	0.0439
M0172/CG102	9.2190	14.8878	NA	64.8506	67.8574	99.7302	216.8169	0.0802
M0172/LH185	7.3673	16.9672	NA	68.3843	71.4848	87.1485	205.3469	0.0386
M0172/LH198	7.7517	17.4397	NA	70.4952	72.9288	99.6876	210.9413	0.0975
M0262/CG102	10.0891	16.3103	NA	65.2128	67.9266	103.7535	234.7387	0.0504
M0262/LH185	9.4663	17.1645	NA	69.6804	71.2407	96.5580	216.0451	0.0514
M0262/LH195	6.3857	18.3209	NA	75.2336	77.6906	98.0139	220.8632	-0.0079
M0262/LH198	6.5961	17.3775	NA	71.0259	73.8179	104.0112	218.4855	0.0850
M0262/LH82	7.6360	17.5774	NA	66.2548	67.7807	88.8799	200.3998	0.1297
M0262/PB80	8.1707	18.6819	NA	71.8691	73.5559	106.5817	217.6266	0.0895
M0262/PHZ51	8.4153	17.1623	NA	70.2100	70.9097	118.1684	249.6669	0.1032
M0264/CG102	9.9879	15.2788	NA	64.3514	66.6867	95.7002	207.9765	0.1043
M0264/PB80	8.2970	18.9638	NA	69.7947	72.1581	96.3721	202.5495	0.0852
M0266/CG102	9.3564	15.5415	NA	64.9733	67.8377	103.6855	221.9627	0.1296
M0266/LH185	9.0005	17.3915	NA	69.7915	72.3495	101.7087	214.3171	0.0668
M0266/LH198	7.4822	17.1135	NA	71.6658	74.0460	106.3153	215.5769	0.0876
M0266/LH82	8.5920	18.5941	NA	66.6865	69.2805	98.0963	209.3169	0.0897
M0266/PB80	8.6749	18.4810	NA	71.7042	74.4407	108.5268	214.1694	0.0541
M0266/PHZ51	8.3506	17.1473	NA	69.6481	74.4762	105.4291	226.9931	0.1583
M0269/CG102	9.3101	14.6161	NA	65.2186	67.8907	115.0595	224.0191	0.0865
M0269/LH185	8.6536	16.7486	NA	69.0127	70.9518	93.4270	210.3622	0.0839
M0269/LH198	7.1162	16.5741	NA	71.2613	74.4343	109.3816	216.1864	0.1142
M0272/LH185	8.6992	17.2185	NA	69.6033	71.7337	92.4558	208.4172	0.0345
M0272/LH198	7.8277	17.1298	NA	71.0032	73.9629	107.3485	212.6388	0.0605
M0275/PB80	8.1759	18.6042	NA	74.1943	75.6320	120.6838	212.8023	0.0941
M0276/CG102	9.4183	14.7899	NA	64.3487	66.0521	104.5540	208.9460	0.0696
M0276/LH195	9.8817	19.4615	NA	73.4115	75.2315	115.2470	225.6308	0.0603
M0276/LH198	8.5643	17.2436	NA	71.0373	73.2253	108.3415	211.4556	0.0708
M0276/PB80	8.8900	18.6742	NA	70.2191	72.1108	105.8299	211.1637	0.0621
M0287/CG102	8.0358	14.9502	NA	67.0395	69.2697	119.2209	239.6685	0.0819
M0287/LH185	9.5264	17.2688	NA	69.4786	71.5101	104.9839	221.7555	0.0818
M0287/LH198	7.4804	17.9787	NA	73.1108	75.4439	124.3978	229.3033	0.1179
M0296/LH185	9.0607	17.1920	NA	69.3168	71.1377	95.3372	210.1223	0.0558
M0296/LH198	8.1173	18.5316	NA	71.8443	74.3570	107.2165	215.2803	0.0904
M0297/CG102	9.8752	15.1703	NA	65.4488	67.1233	118.1905	224.1858	0.0799
M0297/LH185	9.4526	16.5613	NA	68.4038	70.4558	93.2282	214.4759	0.0572
M0297/LH198	7.5640	17.7863	NA	72.5603	74.3990	113.7308	217.9696	0.0773
M0309/CG102	9.2605	15.5156	NA	64.2597	66.2075	106.1939	224.1622	0.0941
M0309/LH198	6.2537	17.6005	NA	70.5219	72.9517	98.6783	204.0791	0.1650
M0310/PB80	8.9294	19.1688	NA	70.2274	72.6947	120.0866	225.5588	0.1065
M0311/CG102	8.8433	15.4324	NA	65.9986	68.7986	117.2397	230.8210	0.1457
M0311/LH185	9.2070	17.6686	NA	69.4504	71.9359	97.6446	214.6484	0.1276
M0311/LH198	7.4556	17.8552	NA	71.4287	74.0455	109.5161	217.9857	0.1034
M0315/PB80	8.7939	18.8896	NA	72.8271	74.9546	127.6617	230.7024	0.0748
M0317/CG102	8.2846	15.1988	NA	64.7551	66.7514	110.0560	232.2059	0.3452
M0317/LH185	9.8816	18.7919	NA	69.6441	70.7054	98.0286	214.9455	0.0471
M0317/LH195	8.9131	21.0018	NA	72.8995	74.8270	104.8556	225.1366	-0.0003
M0317/LH198	7.7112	19.5601	NA	71.5614	74.0777	104.9384	215.1376	0.0590
M0321/LH195	9.3801	19.8248	NA	74.5293	75.6185	112.9656	223.6805	0.0815
M0323/CG102	9.8345	16.1100	NA	64.9516	68.0804	116.8354	226.2289	0.1379
M0323/LH185	10.0117	17.6969	NA	68.4881	70.8006	100.3192	214.0438	0.0858
M0323/LH198	8.8286	17.7227	NA	70.8808	73.5153	113.4800	221.1046	0.1059
M0323/PB80	8.6633	19.0294	NA	71.6901	74.7372	123.1920	227.8193	0.0959
M0325/CG102	10.1389	16.3809	NA	65.0892	67.3932	127.2243	237.3901	0.1127
M0325/LH185	10.6956	18.1252	NA	69.4321	71.2970	104.2634	224.2894	0.0696
M0325/LH195	10.8025	20.7001	NA	74.5794	75.5519	116.4024	238.1664	0.0548
M0325/LH198	9.2516	19.1345	NA	72.0177	73.7728	120.0526	228.6971	0.0938
M0325/PB80	9.4554	19.6128	NA	72.9488	74.4043	121.0342	233.6552	0.0915
M0326/CG102	9.8793	15.3173	NA	65.5043	68.4198	116.4833	226.9839	0.1097
M0326/LH185	9.1923	17.6138	NA	69.2439	70.9713	96.2357	224.1010	0.1073
M0326/LH195	9.0424	19.5827	NA	74.8544	76.5703	118.4430	229.6186	0.0505
M0326/LH198	7.2773	17.3624	NA	71.9787	74.2845	117.6292	221.6068	0.1241
M0326/PB80	8.3443	18.6465	NA	71.9032	73.9275	119.4393	226.4771	0.0723
M0328/PB80	9.3901	19.5790	NA	73.3046	75.1091	123.8420	231.8801	0.0884
M0341/CG102	8.4046	15.8943	NA	67.0428	69.2652	113.4034	236.6742	0.1193
M0341/LH185	8.2665	18.3292	NA	69.0858	72.1068	116.2809	225.0072	0.0928
M0345/LH185	8.1855	17.8368	NA	70.6195	72.9363	83.8749	200.7764	0.0723
M0346/CG102	9.7270	15.0730	NA	64.6881	67.4027	105.4032	222.2104	0.1013
M0346/LH185	9.5788	17.3165	NA	68.2505	70.8554	101.2183	218.6865	0.0591
M0346/LH198	8.1005	17.4482	NA	70.7695	73.5903	111.5273	227.2124	0.0868
M0352/CG102	9.8563	15.9460	NA	63.2696	64.7586	106.8987	213.2843	0.0997
M0352/LH185	9.9161	17.0841	NA	66.5715	67.9899	94.3026	200.8414	0.0769
M0354/CG102	9.9014	14.8558	NA	65.6665	67.2953	119.1405	221.5552	0.1137
M0354/LH185	8.1922	17.2485	NA	68.5197	71.4339	100.8617	212.1890	0.1008
M0354/LH198	7.4676	16.4631	NA	71.2211	73.7628	115.7085	214.6925	0.1706
M0355/CG102	9.3649	14.7734	NA	64.3104	66.8719	105.0288	224.6069	0.0622
M0355/LH185	9.4248	16.6681	NA	68.3622	70.2858	94.9869	212.2278	0.0737
M0357/LH185	9.5863	18.8865	NA	69.7844	70.6506	97.0889	202.5846	0.0823
M0357/PB80	8.6787	19.7327	NA	69.3366	73.0029	105.4420	211.4402	0.0496
M0360/CG102	9.6007	15.1088	NA	64.1778	66.8587	121.6554	223.2851	0.0982
M0365/LH198	7.2725	17.9071	NA	71.5596	75.1809	110.8522	219.5886	0.0810
M0368/PB80	8.4979	18.3424	NA	70.2398	73.0517	112.0786	220.6261	0.0639
M0369/LH185	9.2501	18.3266	NA	68.7726	70.8758	95.0369	210.6749	0.0964
M0369/LH198	8.3488	18.7579	NA	70.8177	73.8507	106.0891	205.0959	0.0981
M0369/PB80	9.2370	20.0208	NA	70.7358	72.7653	108.9471	215.5468	0.0764
M0378/CG102	8.5515	14.6494	NA	65.1494	67.6898	120.4018	242.2031	0.1101
M0378/LH185	8.6727	15.4795	NA	69.4091	71.8248	104.4054	218.5498	0.1303
M0382/LH195	9.6600	19.4834	NA	73.1629	75.4871	103.2901	213.0829	0.0377
M0382/PB80	8.6019	19.8773	NA	70.2047	72.4520	106.7396	206.7628	0.0577
M0383/LH195	9.7808	19.7718	NA	73.8412	76.0658	110.3181	226.2234	0.0439
M162W/B47	8.8763	19.0087	NA	73.5681	74.7767	124.4900	230.0620	0.1862
M162W/LH195	10.6218	21.0448	NA	76.6147	78.4073	130.4949	244.6364	0.3663
M162W/PHZ51	7.7294	18.4018	NA	75.3375	77.2503	137.4604	254.9930	0.2137
MBNIL_B004/LH185	10.8261	17.4544	NA	69.5162	72.1816	116.6747	229.1274	0.1350
MBNIL_B004/PHZ51	10.0604	17.4435	NA	69.6546	72.4618	126.0165	247.0894	0.1498
MBNIL_B015/3IIH6	10.6749	15.7938	NA	67.6672	68.2842	108.6813	231.7078	0.0684
MBNIL_B015/LH185	8.9292	18.4883	NA	68.0162	71.4416	106.1068	229.8352	0.1461
MBNIL_B015/PHZ51	7.7830	17.6415	NA	68.9439	72.1820	126.1102	245.9037	0.1101
MBNIL_B040/3IIH6	10.0786	16.0431	NA	67.5508	67.9771	112.5459	230.5374	0.0823
MBNIL_B043/3IIH6	10.1567	16.1851	NA	67.6453	67.7461	105.6059	223.5558	0.0372
MBNIL_B043/PHZ51	8.8835	17.3263	NA	68.6563	70.3561	114.1749	234.8198	0.0586
MBNIL_B044/PHZ51	8.7447	17.8749	NA	70.8746	72.9400	130.5224	243.3852	0.0922
MBNIL_B049/PHZ51	9.5639	17.6005	NA	69.9756	72.8181	131.5046	250.6912	0.0883
MBNIL_B055/3IIH6	9.4145	15.9194	732.8774	69.5162	71.6777	113.9787	232.9254	0.3045
MBNIL_B055/LH185	10.0787	17.6304	714.5976	69.4696	71.2090	116.9339	233.9260	0.1493
MBNIL_B055/PHZ51	9.3990	17.1893	745.2837	69.9469	72.0680	129.1623	249.7917	0.1398
MBNIL_B057/3IIH6	9.7017	16.9232	742.6189	68.5162	70.1816	126.9912	252.4705	0.4587
MBNIL_B057/PHZ51	9.5776	18.3460	756.6355	69.9678	72.6692	140.1485	261.8046	0.1887
MBNIL_B065/3IIH6	9.1502	16.1397	704.3111	68.0853	69.7538	117.4593	232.3331	0.0722
MBNIL_B065/PHZ51	9.2426	17.2880	759.4548	68.2750	70.6838	122.1297	249.2811	0.0988
MBNIL_B078/3IIH6	9.5448	16.8858	NA	69.3189	71.0597	97.1995	226.6718	0.1050
MBNIL_B078/PHZ51	8.6077	17.3946	750.8892	69.7797	72.3739	113.6969	232.4265	0.0628
MBNIL_B102/3IIH6	9.2085	16.4396	737.0043	68.0162	69.6777	109.3105	228.9980	0.2062
MBNIL_B102/LH185	9.7661	18.0144	731.0257	69.0162	70.6777	113.8908	229.4529	0.2850
MBNIL_B102/PHZ51	9.4436	16.9987	762.4262	69.9951	72.2278	125.4904	246.8177	0.0802
MBNIL_B107/PHZ51	8.5402	17.5672	780.5015	69.6783	72.5027	124.4582	250.1182	0.0921
MBNIL_B111/3IIH6	10.2332	16.4023	735.1113	69.1786	71.2109	118.4715	229.7512	0.0966
MBNIL_B111/PHZ51	9.5318	17.4868	757.3997	69.5254	72.7773	128.5752	246.2685	0.1025
MBNIL_B122/3IIH6	10.0140	16.4994	711.1582	68.9767	70.5723	119.2509	236.8012	0.0854
MBNIL_B122/PHZ51	9.2937	17.7561	750.7219	70.0077	73.0365	127.1128	248.9808	0.1165
MBNIL_B123/3IIH6	9.7915	16.7962	740.3523	67.7882	69.3648	130.7599	250.4338	0.3201
MBNIL_B123/PHZ51	7.8745	17.9602	752.8992	69.6117	73.4677	125.5936	250.0836	0.1120
MBNIL_B125/3IIH6	11.9304	17.1421	741.6395	69.5254	71.1940	132.4593	245.2480	0.0902
MBNIL_B125/PHZ51	9.7618	18.1816	765.8072	70.5915	73.3540	134.0476	260.3067	0.1677
MBNIL_B131/3IIH6	10.5525	15.9544	730.1816	68.7538	70.1409	120.5012	235.3067	0.1395
MBNIL_B131/LH185	9.8681	18.3709	710.6339	68.0162	70.4336	111.2349	222.6391	0.1615
MBNIL_B131/PHZ51	8.9832	17.0251	744.1569	70.0121	72.5956	123.7433	243.8205	0.1601
MBNIL_B136/3IIH6	8.4512	16.0274	719.7573	66.9178	68.8050	99.0066	214.1398	0.1003
MBNIL_B136/PHZ51	7.6968	17.5253	696.0488	69.4166	71.9741	115.4532	231.8012	0.0692
MBNIL_B144/3IIH6	9.0070	16.5768	733.9529	68.0162	69.6777	102.9587	213.4980	0.1719
MBNIL_B144/LH185	9.2180	18.3205	722.7917	68.0162	69.9297	104.1546	208.6941	0.0965
MBNIL_B154/3IIH6	10.1297	16.2327	741.1076	67.9503	69.4769	116.7118	228.5900	0.0782
MBNIL_B154/PHZ51	9.3796	17.5353	759.7278	69.6042	71.9085	120.5216	242.1996	0.0970
MBNIL_B169/PHZ51	9.1490	17.2588	759.5744	71.0680	73.6480	130.0460	247.4297	0.1156
MBNIL_B175/3IIH6	10.0193	15.9611	750.6498	66.5254	68.1940	107.8240	216.3721	0.0861
MBNIL_B175/LH185	10.6524	18.5325	734.6980	68.1408	70.6464	93.4925	213.8612	0.0733
MBNIL_B175/PHZ51	8.0292	17.6259	771.3025	69.0317	71.8695	110.8903	228.6088	0.0465
MBNIL_B189/3IIH6	10.6467	17.0576	NA	70.8189	73.0597	99.6995	239.1718	0.0550
MBNIL_B189/LH185	11.3956	18.2126	723.8962	69.3648	71.0086	111.3947	232.5289	0.0939
MBNIL_B189/PHZ51	10.0137	17.8589	760.9266	69.4378	71.7019	125.5274	251.1047	0.0739
MO17/3IIH6	9.2125	16.8638	694.2531	68.1346	70.6359	117.5459	234.5713	0.1531
MO17/B47	9.7612	17.8780	735.7430	69.1871	72.1664	114.6346	228.7822	0.0789
MO17/LH195	12.2214	19.8970	712.4307	73.7942	76.2018	121.7721	242.2543	0.2232
MO17/LH82	8.8045	17.5721	706.2262	66.3307	69.1755	99.8443	205.5162	0.1174
MO17/PHZ51	8.6562	17.7470	705.6288	69.9356	73.2978	114.0955	232.0469	0.1747
MO44_LH145_0047/CG102	9.6497	14.2647	780.9311	62.5455	65.0304	101.5615	234.7957	0.0020
MO44_LH145_0081/PB80	9.6756	20.2889	736.9628	73.7475	75.2215	122.7450	219.8525	0.1913
MO44_LH145_0107/PB80	8.4147	19.6557	736.1990	70.7674	72.7394	107.0492	217.9618	0.0542
MO44_LH145_0127/B47	9.3765	16.8543	748.8773	65.9492	67.2887	97.3695	210.8773	0.0786
MO44_LH145_0127/CG102	10.8533	14.1216	770.2931	60.6962	62.6675	96.2822	210.5921	0.0969
MO44_LH145_0127/LH185	9.5567	16.3056	742.0756	65.6338	66.1984	97.5043	207.9951	0.1068
MO44_LH145_0127/LH195	9.8617	18.9978	739.5187	69.3379	71.5015	113.1445	219.8243	0.0601
MO44_LH145_0127/LH198	10.7002	15.9769	760.0810	67.2400	68.9163	111.9017	222.2413	0.0904
MO44_PHG47_0125/CG102	9.9881	16.0769	754.3690	60.9887	62.6924	85.2247	196.6848	0.0645
MO44_PHG47_0125/LH198	9.7722	18.3001	738.7285	67.1909	69.2744	95.9922	205.2433	0.0742
MO44_PHW65_0025/CG102	11.0253	14.4111	780.9311	64.5499	66.4950	89.2728	216.7772	0.0029
MO44_PHW65_0025/LH185	9.4983	17.8886	727.2275	69.6340	71.5789	91.1844	216.2933	0.0795
MO44_PHW65_0025/LH198	9.0289	16.7257	760.9264	70.2742	72.2311	113.8209	234.1025	0.1218
MO44_PHW65_0035/CG102	10.0015	16.6307	762.3039	64.3814	66.4168	94.8543	213.6876	0.0790
MO44_PHW65_0035/LH185	9.6495	19.5366	732.7283	69.3456	71.4168	95.3548	221.7892	0.0780
MO44_PHW65_0035/LH198	8.1409	18.9186	748.7852	70.9353	73.1333	111.9933	228.2853	0.1053
MO44_PHW65_0075/CG102	11.0210	14.8344	774.4952	64.0954	66.6117	98.6514	223.9693	0.0171
MO44_PHW65_0075/LH198	9.1627	17.2350	768.9385	69.6739	72.4030	102.2945	225.2501	0.0912
MO44_PHW65_0126/CG102	10.3607	16.0722	769.3464	64.4883	67.1870	102.7086	213.5069	-0.0098
MO44_PHW65_0126/LH185	9.2954	18.7624	749.5619	69.3498	71.8844	94.4101	217.9595	0.0669
MO44_PHW65_0126/LH198	9.4900	17.2242	770.3862	69.8708	72.6242	105.8877	218.1039	0.0779
MO44_PHW65_0193/CG102	8.9118	14.5306	758.6496	61.7035	65.0614	81.7879	198.7790	0.0571
MO44_PHW65_0193/LH185	8.9547	17.9568	736.9437	67.9585	69.8464	86.9520	207.3473	0.0634
MO44_PHW65_0193/LH198	7.3272	17.3731	765.3363	68.1727	71.5562	100.0783	209.6735	0.0757
MOG_LH123HT-014-1-1-1-1-B/LH185	8.0245	18.4403	734.5364	69.6924	71.9479	99.6072	236.8362	0.0929
MOG_LH123HT-014-1-1-1-1-B/LH198	9.0644	19.5710	737.3408	71.3281	73.3661	121.1978	241.2812	0.1055
MOG_LH123HT-019-1-1-1-1-B/B47	9.7508	18.9704	734.0885	72.3753	71.9579	116.4123	238.9659	0.0811
MOG_LH123HT-019-1-1-1-1-B/LH195	10.1832	20.4883	701.7148	74.3406	75.7425	112.2781	223.5822	0.1205
MOG_LH123HT-019-1-1-1-1-B/PB80	9.5249	18.6116	718.5909	71.1757	72.6732	129.3050	239.2795	0.0699
MOG_LH123HT-031-1-1-1-1-B/B47	9.2284	19.1922	732.9773	70.3743	72.2857	120.3363	233.5074	0.1575
MOG_LH123HT-031-1-1-1-1-B/LH185	9.1979	18.4352	724.5816	70.6281	72.9101	104.0779	229.0080	0.1513
MOG_LH123HT-031-1-1-1-1-B/LH195	11.1092	20.2210	730.8493	72.9933	75.8262	131.7906	246.6668	0.1419
MOG_LH123HT-031-1-1-1-1-B/LH198	9.8912	19.5184	735.2724	70.1234	73.7742	131.3882	239.9347	0.1331
MOG_LH123HT-045-1-1-1-1-B/LH185	8.9069	19.0338	735.8811	71.1894	72.9316	100.2748	218.0374	0.0686
MOG_LH123HT-045-1-1-1-1-B/LH198	9.6893	20.8837	733.1887	72.8893	74.3784	122.9391	235.2851	0.1332
MOG_LH123HT-059-1-1-1-1-B/B47	10.5544	17.7141	737.7073	72.9207	72.9634	119.4747	247.0682	0.0856
MOG_LH123HT-059-1-1-1-1-B/LH195	11.4648	21.1478	726.9643	75.1442	76.7658	124.1554	252.2919	0.1007
MOG_LH123HT-059-1-1-1-1-B/PB80	10.3540	19.1190	732.4881	72.7078	74.0426	130.5914	259.5419	0.1344
MOG_LH123HT-074-1-1-1-1-B/LH185	8.9719	18.6831	732.7299	70.3782	74.9238	102.7251	227.3584	0.0718
MOG_LH123HT-093-1-1-1-1-B/PB80	11.2495	19.1497	729.0279	72.6932	74.6268	145.4933	266.5739	0.0984
MOG_LH123HT-199-1-1-1-1-B/B47	9.4922	18.2833	750.8546	71.4938	72.8382	124.6870	261.8684	0.0635
MOG_LH123HT-199-1-1-1-1-B/LH185	9.0188	20.3262	737.4801	70.3860	72.1004	112.8862	239.2482	0.0954
MOG_LH123HT-199-1-1-1-1-B/LH195	10.9136	20.6876	726.1713	73.3789	74.7790	120.3339	254.0383	0.1409
MOG_LH123HT-199-1-1-1-1-B/LH198	12.5661	21.8227	721.0225	72.4914	74.4715	136.6763	264.3096	0.1115
MOG_LH123HT-199-1-1-1-1-B/PB80	10.0837	19.5754	733.1142	71.2375	73.0914	139.2278	256.3937	0.1682
MOG_LH145_0006/B47	10.6769	17.8802	NA	68.9862	70.4217	98.2175	234.2583	0.1477
MOG_LH145_0006/CG102	9.9269	15.6496	774.9033	64.6849	66.3182	117.1904	217.3435	0.1661
MOG_LH145_0006/LH185	9.6268	17.8451	738.8970	67.9679	69.0736	102.5180	217.2680	0.1049
MOG_LH145_0006/LH198	10.1249	18.9810	734.8225	69.5761	71.6075	124.9793	234.0629	0.1212
MOG_LH145_0006/PB80	8.6753	18.2150	752.0021	69.1258	72.4037	106.1395	214.4305	0.1529
MOG_LH145_0038/CG102	9.2432	15.8639	783.5055	65.4150	66.7357	116.7086	224.9396	0.5095
MOG_LH145_0038/LH198	9.3249	17.4538	756.0933	68.8709	71.6794	123.1515	226.9700	0.1643
MOG_LH145_0057/LH185	8.9784	18.6176	726.0374	68.7454	71.0292	104.5836	230.8135	0.1021
MOG_LH145_0057/LH198	9.2967	18.4331	747.2140	70.7322	73.5352	121.8262	235.1052	0.2298
MOG_LH145_0057/PB80	9.5186	18.3954	760.8701	69.6958	72.9374	119.7089	240.7348	0.4815
MOG_LH145_0131/LH195	9.2448	18.8542	765.2197	70.3016	72.0425	111.6603	218.1151	0.1154
MOG_LH145_0131/PB80	7.8387	19.6466	721.3878	67.9978	69.7957	119.3691	224.2440	0.1222
MOG_LH145_0163/LH195	10.0786	19.6773	727.4483	73.3151	74.5514	120.9364	230.6468	0.2203
MOG_LH145_0163/PB80	9.5027	18.8098	755.2712	69.2358	71.0897	126.9431	237.8402	0.2386
MOG_LH145_0175/B47	8.8479	17.8040	739.8871	70.2674	71.6578	117.3446	225.3374	0.4894
MOG_LH145_0175/CG102	8.4948	15.6020	762.9304	65.3943	67.2259	129.6635	233.0089	0.3571
MOG_LH145_0175/LH185	9.1501	18.8316	721.6955	69.7208	72.1270	105.7613	216.5797	0.1189
MOG_LH145_0175/LH195	6.7947	NA	784.5352	72.9663	74.8596	133.7557	227.0863	0.3760
MOG_LH145_0175/LH198	9.6308	18.4756	749.9600	70.7942	72.9656	128.5850	227.7688	0.2738
MOG_LH145_0175/PB80	8.1779	19.2142	758.2989	70.4747	72.4454	123.9338	230.1738	0.4968
MOG_MO45-030-1-1-1-1-B/LH185	10.5768	19.4886	727.6115	68.5540	71.0867	101.4838	219.3463	0.0774
MOG_MO45-030-1-1-1-1-B/LH195	10.6662	20.7220	740.8245	72.1015	73.9346	112.1175	221.4641	0.1213
MOG_MO45-030-1-1-1-1-B/LH198	9.7428	19.2805	750.2666	69.2033	71.8967	116.5812	226.1401	0.1195
MOG_MO45-030-1-1-1-1-B/PB80	9.3378	19.6590	743.4197	69.7064	71.7159	122.1996	234.7512	0.1158
MOG_MO45-045-1-1-1-1-B/PB80	9.8720	19.2962	737.8284	70.0713	72.5154	131.6682	260.0803	0.2287
MOG_MO45-054-1-1-1-1-B/LH195	10.4595	19.8084	742.9071	71.8394	74.2940	127.0882	240.3590	0.2785
MOG_MO45-054-1-1-1-1-B/PB80	10.0585	19.8852	726.2808	71.7762	73.6761	124.5094	234.3199	0.1213
MOG_MO45-055-1-1-1-1-B/B47	8.8238	19.3696	732.3065	71.5679	73.1294	131.5870	247.1051	0.2286
MOG_MO45-055-1-1-1-1-B/LH195	10.1857	20.9409	739.7240	73.7838	74.8144	120.1266	238.4864	0.1951
MOG_MO45-055-1-1-1-1-B/PB80	10.2169	19.9503	737.4677	71.8452	73.0883	132.0940	251.9727	0.2594
MOG_MO45-071-1-1-1-1-B/LH195	10.3219	19.9610	710.9079	73.0129	74.9592	122.8684	234.9041	0.1337
MOG_MO45-071-1-1-1-1-B/LH198	9.9297	19.3893	731.4574	71.6291	73.8894	134.4678	236.5322	0.1708
MOG_MO45-071-1-1-1-1-B/PB80	8.5707	18.9471	735.2175	71.5444	73.4930	130.7553	240.6964	0.2856
MOG_MO45-074-1-1-1-1-B/B47	8.7245	18.2123	733.4196	70.7309	73.5887	143.8195	248.6591	0.1775
MOG_MO45-074-1-1-1-1-B/LH185	8.8478	19.5265	722.6671	70.8823	74.3008	111.7656	227.8000	0.1570
MOG_MO45-074-1-1-1-1-B/LH195	9.7462	19.9956	735.2566	72.9195	74.3900	129.5533	241.0000	0.1964
MOG_MO45-074-1-1-1-1-B/LH198	10.0066	19.5104	742.2850	71.7954	75.0367	127.9262	237.6642	0.1794
MOG_MO45-074-1-1-1-1-B/PB80	10.0943	19.5273	735.8854	72.3202	74.4403	140.3751	252.6163	0.2112
MOG_MO45-078-1-1-1-1-B/LH185	8.4742	19.9358	721.6097	69.1986	71.6217	114.2887	234.0650	0.2427
MOG_MO45-078-1-1-1-1-B/LH195	8.0048	20.2164	754.4586	71.6377	74.3371	132.6695	237.6383	0.4499
MOG_MO45-078-1-1-1-1-B/LH198	10.4851	19.5163	720.4370	69.0005	71.0999	136.4485	251.0153	0.6154
MOG_MO45-078-1-1-1-1-B/PB80	8.9781	18.9991	749.6659	69.0056	72.1078	130.3334	243.5539	0.3193
MOG_MO45-085-1-1-1-1-B/B47	10.8334	17.7323	730.7183	69.7683	70.5424	125.9323	244.6721	0.2058
MOG_MO45-085-1-1-1-1-B/CG102	8.4501	16.0742	767.8621	64.9163	66.8437	105.5447	215.0618	0.3631
MOG_MO45-085-1-1-1-1-B/LH185	9.2158	19.6823	712.0987	69.7947	72.1116	106.6990	232.3516	0.3576
MOG_MO45-085-1-1-1-1-B/LH195	10.2092	19.8176	741.8100	73.0613	74.5020	123.5170	240.2374	0.2559
MOG_MO45-085-1-1-1-1-B/LH198	9.2154	18.2702	754.7113	70.3341	72.6800	123.6033	233.9036	0.2866
MOG_MO45-085-1-1-1-1-B/PB80	8.4295	19.1614	740.3060	70.6192	72.7041	131.0932	240.4166	0.4368
MOG_MO45-128-1-1-1-1-B/B47	5.6422	18.8735	728.2982	73.3876	NA	121.7557	246.0834	NA
MOG_MO45-128-1-1-1-1-B/LH185	10.0538	19.4810	721.4611	69.0529	72.6198	111.8898	228.0079	0.0758
MOG_MO45-128-1-1-1-1-B/LH195	10.0075	19.5927	736.2871	73.2945	76.0474	123.2219	242.4051	0.1261
MOG_MO45-128-1-1-1-1-B/LH198	10.0006	19.1913	738.6695	70.5530	72.9973	125.8148	243.0323	0.1086
MOG_MO45-128-1-1-1-1-B/PB80	9.5709	19.3132	743.3967	70.0542	73.1295	124.3573	246.1026	0.2659
MOG_MO45-139-1-1-1-1-B/PB80	9.9501	19.7721	757.8535	69.2678	71.9041	121.1505	233.9492	0.1453
MOG_NC230-007-1-1-1-1-B/PB80	9.9883	18.8512	718.9762	70.4882	72.2217	133.1433	244.9610	0.1959
MOG_NC230-008-1-1-1-1-B/PB80	8.6912	19.9714	741.7952	70.5934	72.9938	137.2273	247.1104	0.2990
MOG_NC230-009-1-1-1-1-B/LH195	11.2497	21.6861	714.5103	73.4448	75.3196	129.4257	257.8776	0.3108
MOG_NC230-009-1-1-1-1-B/PB80	9.0541	18.9446	765.3870	70.3262	72.5815	133.5868	247.8621	0.2642
MOG_NC230-010-1-1-1-1-B/LH185	10.0554	21.5582	705.7529	69.3049	73.1804	106.2503	226.9329	0.1052
MOG_NC230-010-1-1-1-1-B/PB80	9.3273	19.4827	759.3602	71.7916	74.4029	127.0868	243.0347	0.2078
MOG_NC230-011-1-1-1-1-B/CG102	10.7385	16.3647	752.6130	65.1229	66.5119	116.5615	239.3899	0.5624
MOG_NC230-011-1-1-1-1-B/LH198	7.8996	19.1567	754.2026	70.2414	73.5312	122.3841	235.2054	0.1617
MOG_NC230-011-1-1-1-1-B/PB80	9.5687	19.7192	744.3145	69.8106	71.7533	124.3772	234.8304	0.2293
MOG_NC230-028-1-1-1-1-B/PB80	9.6164	19.4071	718.0316	71.6970	73.5205	125.9583	237.5215	0.1302
MOG_NC230-043-1-1-1-1-B/PB80	9.5103	20.7482	740.5215	74.2971	76.9402	135.6980	241.1685	0.2360
MOG_NC230-183-1-1-1-1-B/CG102	9.9163	18.7166	732.0181	65.4479	66.6425	102.8371	214.1894	0.1345
MOG_NC230-183-1-1-1-1-B/LH185	9.1336	21.5533	707.9882	69.7840	74.5550	98.8807	218.8649	0.0722
MOG_NC230-183-1-1-1-1-B/LH198	9.3321	21.8131	719.9804	72.0622	74.6825	122.6774	230.8505	0.1310
MOG_NC230-183-1-1-1-1-B/PB80	4.7447	18.2198	758.1837	70.2905	72.6110	133.8610	242.4194	0.3941
MOG_OH43_0071/CG102	11.1687	17.4748	765.1592	64.5379	67.5410	96.0373	206.1578	0.1382
MOG_OH43_0071/LH185	7.9186	19.5117	717.6076	69.4739	72.2009	96.9993	215.8655	0.0987
MOG_OH43_0170/CG102	10.7120	15.7787	769.4227	63.2139	65.3004	93.7694	210.1566	0.0973
MOG_OH43_0170/LH185	8.3774	17.5291	732.1416	68.8166	70.7402	94.8459	215.0743	0.1106
MOG_OH43_0170/LH198	9.4131	17.7145	754.5550	68.8438	70.9960	108.8515	219.1729	0.0973
MOG_OH43_0179/PB80	9.5369	19.6376	743.5468	69.3888	72.1701	120.2598	256.1503	0.1481
MOG_OH43_0300/LH195	10.2706	20.7152	728.6906	71.8797	74.2467	119.8800	226.2750	0.3238
MOG_OH43_0300/PB80	9.5173	19.7078	734.8762	70.3386	73.1362	134.8327	243.3229	0.1683
MOG_OH43_0367/LH185	8.4237	19.4335	716.5778	69.3918	71.3551	93.5158	215.3261	0.1011
MOG_OH43_0367/LH198	9.0313	20.2513	716.2828	69.3297	72.0334	111.4106	218.5590	0.1258
MOG_OH43_0402/PB80	9.3341	19.3151	730.4640	69.5166	72.0161	114.4957	226.7763	0.1029
MOG_OH43_0416/LH185	8.9573	17.9984	710.4078	69.0721	70.4966	97.2682	231.3414	0.1221
MOG_PHG83-014-1-1-1-1-B/CG102	10.5652	15.8647	760.3362	65.6337	67.1250	107.5615	215.9647	0.0091
MOG_PHG83-014-1-1-1-1-B/LH185	8.8540	17.8714	731.9972	69.9856	71.9853	102.4866	214.0446	0.0722
MOG_PHG83-014-1-1-1-1-B/LH195	7.8572	18.7710	NA	70.9231	73.5996	105.5386	220.0808	0.0409
MOG_PHG83-069-1-1-1-1-B/LH195	10.0534	19.4709	740.1838	71.8609	73.4347	112.7818	217.1659	0.1411
MOG_PHG83-069-1-1-1-1-B/PB80	10.5442	19.7021	725.1511	71.8516	73.9288	128.7338	229.0006	0.0923
MOG_PHG83-090-1-1-1-1-B/LH185	10.3630	20.4824	717.0222	70.8567	72.7058	108.3325	234.5189	0.1059
MOG_PHG83-090-1-1-1-1-B/LH195	11.0102	21.3542	726.5920	74.1498	75.6645	122.8854	240.6774	0.1185
MOG_PHG83-090-1-1-1-1-B/LH198	9.0480	21.6221	725.8984	71.8847	74.0615	121.4523	234.4459	0.1359
MOG_PHG83-090-1-1-1-1-B/PB80	10.1759	20.5043	717.8340	72.5225	74.5040	139.9873	257.7177	0.1378
MOG_PHG83-119-1-1-1-1-B/LH195	10.7372	19.9484	722.6719	74.0322	75.1235	124.6052	247.6283	0.1479
MOG_PHG83-129-1-1-1-1-B/LH195	10.3951	20.2700	726.6439	73.0213	74.5225	114.3617	218.7209	0.1000
MOG_PHG83-129-1-1-1-1-B/PB80	9.4420	19.4884	731.7042	70.1411	72.2508	126.8633	234.1396	0.0883
MOG_PHG83-197-1-1-1-1-B/PB80	9.2458	19.0960	697.3172	70.6262	72.5342	133.2598	242.8152	0.1143
MOG_PHG83-211-1-1-1-1-B/CG102	10.3913	17.0952	760.0158	64.9808	66.6889	107.1085	233.3066	0.1293
MOG_PHG83-211-1-1-1-1-B/LH185	6.2762	20.5031	739.9355	67.5540	69.1350	118.7115	220.4857	0.0901
MOG_PHG83-224-1-1-1-1-B/LH185	8.8291	20.3491	699.3363	68.6656	71.1545	119.5221	230.4767	0.2274
MOG_PHG83-224-1-1-1-1-B/LH198	9.5633	20.0503	714.5885	69.7783	72.4573	125.9397	233.0777	0.2060
MOG_PHG83-224-1-1-1-1-B/PB80	9.3342	18.9078	720.6356	69.0873	71.6782	131.5812	245.4829	0.2893
MP718/PHZ51	10.3623	20.0353	751.7695	74.2809	76.3215	139.4404	269.9560	0.1413
MP719/PHZ51	9.9883	20.4461	738.4655	75.1581	78.3143	137.4050	261.6101	0.1368
MS222/3IIH6	8.6386	16.9361	737.8455	69.1922	71.0361	117.3058	228.3225	0.0719
N192/3IIH6	8.8666	15.2847	721.7601	67.1749	68.5030	99.2801	211.7524	0.0966
N192/LH82	8.4338	18.0228	744.7793	65.8468	66.7204	90.8033	194.4937	0.0925
N192/PHZ51	8.8065	17.8766	738.2806	67.4414	69.8996	110.3251	237.2935	0.0769
N209/3IIH6	10.1271	15.5698	709.9052	69.9082	71.4566	118.9241	222.8515	0.1351
N217/3IIH6	9.1334	17.3519	723.1645	70.0150	71.2949	111.3501	234.2114	0.1015
N218/3IIH6	8.7009	16.0738	727.2162	69.5684	70.9222	113.2855	222.5567	0.0880
N28HT/3IIH6	8.1915	17.0762	731.3773	69.2028	70.9981	113.8579	228.3800	0.1233
N501/3IIH6	9.3617	16.4795	740.8963	68.0286	69.8095	110.5647	227.4671	0.1528
N501/B47	10.0117	18.6253	748.4214	68.5755	69.8518	102.4114	224.9349	0.0702
N501/LH82	8.4647	18.6224	757.1297	65.5361	67.3832	96.0047	201.9702	0.0970
N501/PHZ51	8.1115	18.2587	748.7757	67.4460	69.1150	116.4357	239.0317	0.1311
N542/B47	9.2356	17.5643	767.1921	68.7833	69.7068	97.5199	216.3723	0.0926
N542/LH82	8.4425	18.7962	742.5797	66.0464	67.2842	80.9338	191.2932	0.1108
N542/PHZ51	8.5416	18.5709	753.8999	69.1076	71.7859	112.3592	233.0491	0.0323
NC258/B47	10.5561	19.4941	742.7505	73.1633	74.7436	115.0463	237.3376	0.0928
NC358/B47	10.2628	21.1198	738.2178	70.6831	71.7551	106.8546	233.3393	0.0814
NC358/LH195	9.9813	21.3725	729.1264	73.0089	74.9124	113.0745	228.8483	0.0575
NC358/LH82	10.0908	19.4231	787.4616	68.2307	70.7931	93.2307	202.6692	0.0821
NC358/PHZ51	10.4629	20.4273	757.8042	69.5519	72.5688	110.7589	224.5608	0.0589
NYH-029/B47	7.8537	16.3144	753.7663	67.2756	69.4753	104.4575	220.8165	0.2225
NYH-052/B47	6.2936	16.4492	747.6676	68.8282	70.3605	89.1881	210.8016	0.2787
NYH-055/B47	9.2999	16.5131	753.8811	67.2309	68.5123	109.7657	217.4099	0.1833
NYH-061/B47	8.0082	17.2923	760.8568	66.4917	68.1995	93.4162	217.8775	0.1706
NYH-128/B47	8.6113	17.2775	736.3402	66.6878	69.1248	96.0507	209.0166	0.1169
NYH-167/B47	8.2728	17.0749	751.0834	67.0239	69.2833	104.2994	220.9213	0.1254
NYH-211/B47	8.7584	17.4495	749.2514	68.1580	70.3201	106.9774	224.4730	0.1015
NYH-229/B47	8.5811	16.9674	747.4262	66.8008	68.8368	100.4993	215.2117	0.1024
NYH-240/B47	8.4772	17.2650	741.5993	67.2263	69.2088	107.1615	226.2718	0.2168
NYH-244/B47	9.7432	16.7528	748.4574	65.6904	67.0910	102.8840	222.4899	0.1764
NYH-245/B47	8.8518	17.6182	745.7293	68.0781	70.2363	102.7855	223.0426	0.1181
NYH-250/B47	8.1327	17.1215	747.2360	66.3770	68.6749	102.5597	221.6164	0.1130
NYH-258/B47	9.4111	17.4661	750.4091	65.3844	67.9860	99.4050	227.2424	0.1751
NYH-269/B47	9.7421	16.9145	720.8374	67.7404	69.4572	100.4869	212.5819	0.1015
OH43/B47	9.0560	17.9607	720.0673	66.9024	67.8805	91.2896	220.8532	0.1256
OH43/LH195	10.6537	19.5767	727.9473	71.6495	73.8570	113.9720	229.9893	0.0899
OH43/LH82	9.2186	18.8598	733.3478	65.6513	67.5116	86.0031	197.2957	0.0559
OH7B/LH195	10.1245	19.1111	729.7327	73.6778	76.2953	121.3707	237.9386	0.1400
OS420/3IIH6	7.8284	16.2666	718.0992	68.4861	70.6140	105.9166	228.8411	0.1981
PB80/CG102	9.5450	15.8390	762.2544	65.8441	67.8837	105.2498	211.7513	0.0774
PB80/LH185	11.0263	17.7605	730.0929	68.9092	70.6347	101.1179	219.6689	0.0699
PB80/LH198	5.8225	17.5480	735.2042	72.6558	74.4943	96.0479	196.1986	0.1658
PB80/LH82	9.1297	17.7247	748.6234	68.1478	70.4879	98.8282	203.5080	0.1465
PB80/PHZ51	9.7259	17.7947	749.1103	70.1662	72.4693	120.9141	243.6973	0.0850
PH207/B47	9.8873	17.1076	732.5600	68.1578	70.2523	102.3593	233.4838	0.0395
PH207_PHG47-1/B47	10.3482	16.2814	729.9083	66.1731	68.6844	111.2434	237.9117	0.0910
PH207_PHG47-10/B47	9.5578	16.3118	726.6426	67.3236	67.9294	105.0528	207.4303	0.0871
PH207_PHG47-11/B47	8.6929	16.0393	738.6081	66.8846	68.7572	85.3650	199.3415	0.0971
PH207_PHG47-13/B47	9.9965	16.5556	731.4072	68.0735	69.7554	108.5266	234.5834	0.0858
PH207_PHG47-14/B47	9.3360	15.5913	728.7426	65.2893	65.6076	101.3390	214.9774	0.1042
PH207_PHG47-15/B47	10.5956	17.4129	745.9322	66.6966	67.9688	105.5286	211.8273	0.0687
PH207_PHG47-16/B47	8.7000	16.5870	731.1366	65.3178	66.0621	91.1355	198.5057	0.0789
PH207_PHG47-17/B47	8.9205	15.9738	720.8361	65.7873	68.0348	95.8773	216.4485	0.0743
PH207_PHG47-18/B47	9.1733	16.5410	753.1509	65.8923	67.3620	95.3251	206.8523	0.0610
PH207_PHG47-2/B47	8.6088	17.2070	726.3229	66.8452	67.7110	98.6163	210.0826	0.0748
PH207_PHG47-20/B47	8.2849	17.1850	738.8649	64.4739	66.2083	86.2831	203.2924	0.0994
PH207_PHG47-22/B47	8.8354	16.3081	734.4799	65.5985	67.8976	91.9431	211.5625	0.0712
PH207_PHG47-23/B47	10.6128	17.1080	734.9350	67.7670	69.0529	96.3062	221.6763	0.0702
PH207_PHG47-24/B47	9.5155	16.5983	731.6159	65.0379	67.6231	103.0053	219.1085	0.0443
PH207_PHG47-3/B47	9.1599	17.1292	729.4087	66.8103	67.9336	91.1299	217.7163	0.1092
PH207_PHG47-4/B47	8.9019	17.4568	738.1730	65.0132	67.9495	93.1048	197.4482	0.0674
PH207_PHG47-5/B47	9.8197	17.5370	720.6936	67.3284	67.5964	102.1749	220.1205	0.0572
PH207_PHG47-6/B47	9.4275	17.6544	740.0503	69.6683	70.4409	111.8970	222.7487	0.0916
PH207_PHG47-7/B47	9.0441	16.3713	726.6608	66.1315	66.8192	96.6184	205.4468	0.0671
PH207_PHG47-8/B47	9.0564	16.8818	738.4579	67.0372	67.4847	101.7988	225.0623	0.0965
PHAW6/B47	9.8949	18.2897	736.9556	69.0719	70.4381	114.5609	221.4308	0.0922
PHAW6/LH82	7.8518	18.3877	728.2009	68.2920	70.1914	96.6893	186.3118	0.0899
PHAW6/PHZ51	9.2328	17.8045	750.8748	71.0372	72.0054	112.3088	223.3014	0.0642
PHB09/3IIH6	9.1263	15.8315	728.1834	67.1885	68.6337	108.5053	218.2930	0.0974
PHBB3/3IIH6	10.0146	15.9862	731.8624	68.4151	70.1935	114.2879	232.2967	0.0798
PHBW8/3IIH6	10.2104	16.3634	735.6867	68.1170	68.9879	111.1125	226.9693	0.0742
PHG29/B47	9.6816	16.3703	752.7549	66.8295	68.5120	98.5658	215.5008	0.0662
PHG29/LH145	8.7694	14.7900	769.7161	65.0669	67.1119	92.3979	206.5398	0.0833
PHG29/PHG47	8.8235	16.1040	745.3880	67.0852	67.7798	101.7390	213.4037	0.0583
PHG29/PHHV4	11.1815	16.2776	767.4336	66.3935	68.4125	104.8857	225.0896	0.0384
PHG29/PHRE1	10.6149	15.7515	770.5018	64.9255	66.1286	111.1933	207.1748	0.0793
PHG29/S8324	10.4651	16.3924	768.7534	64.5563	66.5772	97.8411	212.2259	0.0677
PHG39/LH195	8.8284	19.8086	739.3164	74.4269	76.4608	113.4255	235.4155	0.0146
PHG39/PHG35	9.8325	17.7383	748.3549	72.3944	73.9786	117.8417	231.1990	0.0890
PHG39/PHM49	10.2232	19.8964	741.7590	72.3028	74.5952	113.8185	230.4140	0.0580
PHG39/PHN82	10.8819	19.1391	747.7426	71.3288	73.8881	108.3458	227.0812	0.0572
PHG39/PHP02	11.5045	17.5411	768.0624	69.7168	71.3484	95.5441	221.9141	0.0981
PHG39/TX205	9.6625	19.8036	715.4480	73.5145	75.7131	121.2123	244.5176	0.0956
PHG47/B47	9.7395	15.5898	740.7780	66.4691	67.1198	92.1069	211.7385	0.0541
PHG47/LH145	9.0124	14.8416	767.5486	65.4976	67.0218	89.6686	208.3831	0.0576
PHG47/PHHV4	10.9134	15.8588	766.9853	67.3442	67.8828	94.1073	218.5879	0.0247
PHG47/PHRE1	9.3941	14.8099	774.0561	65.1879	65.1985	92.9400	205.2425	0.0631
PHG47/S8324	9.7257	15.9875	743.7019	64.7061	66.4693	80.0640	206.4266	0.0296
PHG50/B47	8.0077	17.2783	747.5412	66.1452	67.0369	98.3111	215.9925	0.1002
PHG72/B47	8.2656	16.4965	746.9061	67.1136	69.7154	94.2633	203.3529	0.0690
PHG72/LH82	7.9281	16.4633	739.2100	65.3169	67.4246	85.3024	173.3557	0.0778
PHG72/PHZ51	8.6129	17.1707	756.4331	67.5628	70.1476	106.4644	216.2847	0.0705
PHG80/3IIH6	10.4340	16.0416	700.9407	68.1273	69.4897	106.1815	229.4062	0.0671
PHG80/B47	8.9477	18.4351	716.1510	69.4709	71.6854	93.8096	221.3183	0.0807
PHG80/LH82	9.6932	18.7079	724.6045	66.5969	68.1267	88.4366	204.3058	0.0493
PHG80/PHZ51	10.3269	18.7711	728.5344	70.3406	72.5367	119.4894	242.8942	0.0535
PHG83/B47	9.6385	17.1717	761.1678	70.0241	71.5541	112.5660	223.1411	0.1138
PHHV4/3IIH6	10.6518	15.0140	760.9980	67.1123	67.9272	102.1393	226.2617	0.0402
PHHV4/LH162	8.3152	15.6698	800.5476	65.0871	65.8111	101.8816	210.9880	0.0980
PHHV4/LH185	12.3847	17.5166	743.0252	67.8839	67.4890	99.3075	226.9506	0.0624
PHHV4/LH82	9.6715	18.5183	739.4686	67.0675	68.1020	90.3344	207.4942	0.0708
PHHV4/PHK05	7.0312	14.9159	789.3535	62.4519	62.5288	103.0149	212.7981	0.0897
PHHV4/PHK56	11.9044	16.6504	762.0481	68.0974	69.0044	101.7966	229.5064	0.0598
PHHV4/PHR25	9.4843	15.3670	773.6638	64.3247	65.3637	98.9246	221.9609	0.0594
PHHV4/PHW03	9.9364	17.3344	790.5924	67.0383	68.2586	114.4003	233.9129	0.0657
PHHV4/PHZ51	9.9142	17.1825	760.1180	68.6341	70.5716	117.4366	242.9416	0.0823
PHJ40/LH82	9.1025	16.6391	762.5967	63.6990	64.8451	96.2123	195.1089	0.0709
PHJ40/PHP02	8.6269	16.6411	744.8931	64.3252	66.5878	101.3776	212.0921	0.0180
PHJ40/PHZ51	8.4010	16.1000	760.8176	66.6251	68.4053	105.3625	216.0806	0.0642
PHJ89/LH145	8.9068	15.5265	768.9027	65.4969	67.2444	97.3250	221.7332	0.1014
PHJ89/PHHV4	11.6821	16.5200	762.3655	67.2515	67.9276	99.3809	227.9604	0.0257
PHJ89/PHRE1	10.2013	15.5762	774.8156	64.5890	64.6017	96.8311	211.1114	0.0678
PHJ89/S8324	10.1080	16.4461	751.8891	64.8312	65.9161	82.9310	209.9827	0.0604
PHK05/PHRE1	5.5475	14.5039	767.2683	60.7263	60.5263	103.4190	200.5693	0.1205
PHK56/PHRE1	10.0571	15.2899	762.5526	65.5476	66.3961	102.4121	213.8514	0.0703
PHKE6/B47	8.9072	17.2891	733.9465	66.5862	67.6073	101.1951	217.2094	0.0883
PHKE6/LH82	8.6820	16.9569	743.7357	65.9032	67.5431	83.2505	180.5298	0.0623
PHKE6/PHZ51	8.9296	16.5914	734.6328	68.2114	70.4567	104.1920	230.3071	0.0529
PHM49/B47	9.7438	18.4711	734.7215	70.5277	72.3999	106.8491	220.2333	0.0255
PHM49/LH82	8.6916	17.4819	739.3651	68.8198	71.0925	84.9470	186.5442	0.0568
PHM49/PHZ51	8.5716	18.2664	726.5860	70.9602	73.4098	106.1677	234.5830	0.0378
PHM81/B47	7.7283	16.6487	745.4166	63.5748	65.1742	82.8042	185.4427	0.0703
PHM81/PHZ51	7.7711	15.9338	759.1794	64.6555	66.5578	85.2196	203.3886	0.0769
PHN11_LH145_0002/B47	9.0440	17.0918	745.3589	65.7142	68.8333	94.8691	218.6183	0.0603
PHN11_LH145_0002/CG102	8.8866	13.8014	777.8995	61.4355	63.3770	90.1310	205.0026	0.0628
PHN11_LH145_0002/LH185	8.8165	16.6700	748.5625	65.7521	66.8610	81.8022	201.6465	0.0572
PHN11_LH145_0002/LH198	9.0669	17.4087	746.8383	66.1598	68.7029	89.8135	208.8921	0.0438
PHN11_LH145_0003/B47	7.8076	15.9174	741.5553	65.7094	68.8797	75.5194	201.9144	0.1012
PHN11_LH145_0003/CG102	8.4927	13.7259	779.3165	60.7236	62.5665	83.5211	194.6854	0.0578
PHN11_LH145_0003/LH185	7.8908	16.3776	737.3464	65.9535	68.1330	83.5699	206.2694	0.0773
PHN11_LH145_0003/LH198	6.9758	16.1410	758.4062	67.9514	70.8157	96.5126	214.2055	0.0798
PHN11_LH145_0005/B47	8.2844	16.9121	740.6228	67.7545	69.8664	78.6037	201.3982	0.1052
PHN11_LH145_0005/CG102	7.9065	14.3877	764.2541	62.2614	63.9360	80.7670	207.1931	0.0786
PHN11_LH145_0005/LH185	9.0281	16.1345	735.8100	67.6151	68.2738	92.8327	214.0177	0.0952
PHN11_LH145_0005/LH198	8.0048	16.4139	755.2026	66.9880	69.8571	96.6787	209.5536	0.0897
PHN11_LH145_0028/B47	8.9187	15.3229	753.6863	66.5582	67.5880	97.0394	205.7771	0.0844
PHN11_LH145_0028/CG102	8.8051	12.9276	803.9446	61.5601	64.3908	89.0443	199.1721	0.0607
PHN11_LH145_0028/LH185	8.0745	16.1566	751.8139	65.9487	68.2646	92.4612	199.5211	0.0972
PHN11_LH145_0028/LH195	8.7644	17.8515	762.6383	69.4195	71.8673	94.9034	197.4888	0.0601
PHN11_LH145_0028/LH198	7.1089	16.0962	773.5322	67.1832	69.5778	100.3881	201.0497	0.0876
PHN11_LH145_0029/PB80	9.8305	17.4812	791.0551	67.4586	69.9527	103.7923	215.0656	0.0419
PHN11_LH145_0036/CG102	9.1586	15.0768	767.6623	61.8644	64.7307	73.1883	198.4155	0.0601
PHN11_LH145_0036/LH198	8.2896	17.8790	745.9176	67.2382	70.3595	84.3632	203.4983	0.0553
PHN11_LH145_0058/CG102	8.5898	13.8834	783.7385	60.9992	62.5908	85.8595	194.5703	0.0690
PHN11_LH145_0062/CG102	9.2626	14.4213	777.6570	61.2411	63.9566	91.7981	199.8078	0.0615
PHN11_LH145_0062/LH185	8.4892	16.4354	753.5189	66.3545	67.0124	89.4993	205.7351	0.0756
PHN11_LH145_0062/LH198	8.2714	16.0434	762.1093	67.2899	69.5117	100.5002	206.2372	0.0687
PHN11_OH43_0001/B47	8.4528	17.0095	716.5055	67.2874	69.7306	98.9179	227.5238	0.1012
PHN11_OH43_0001/CG102	10.3724	14.5332	756.1401	61.7441	63.6530	97.9462	217.1162	0.0669
PHN11_OH43_0001/LH185	8.6474	17.5818	718.0937	68.0559	70.5477	100.6507	226.4556	0.1172
PHN11_OH43_0001/LH198	9.7092	17.2288	743.3362	67.8985	70.9438	115.7264	236.5515	0.0806
PHN11_OH43_0001/PB80	10.0796	18.7039	721.3976	67.1622	70.5881	114.2358	246.2989	0.0648
PHN11_OH43_0036/B47	7.9284	18.0427	742.2458	66.8143	69.6835	87.8604	208.4951	0.0751
PHN11_OH43_0036/CG102	9.7748	15.5150	773.9553	61.2405	62.9384	86.1281	203.5361	0.0893
PHN11_OH43_0036/LH185	8.9606	18.1205	733.4179	67.5337	69.0163	86.2069	200.2898	0.0690
PHN11_OH43_0036/LH198	9.5990	17.6554	752.5018	68.0570	70.8345	100.3512	217.8399	0.0736
PHN11_OH43_0045/PB80	9.7636	19.2090	738.4815	69.2623	71.1461	118.4853	227.9625	0.0629
PHN11_OH43_0088/B47	8.6457	18.4661	718.3694	69.3279	71.2128	98.5777	226.6989	0.0896
PHN11_OH43_0088/CG102	9.9596	16.7222	749.1598	63.9546	65.9827	82.0434	205.7123	0.0706
PHN11_OH43_0088/LH185	8.6878	19.7009	712.1031	69.3154	70.9588	85.7552	207.4915	0.0599
PHN11_OH43_0088/LH198	9.2751	19.7399	722.2427	69.4034	72.2737	106.6513	228.6720	0.0827
PHN11_OH43_0142/B47	8.6999	17.9148	738.2261	67.9245	68.9019	94.2321	206.3015	0.0726
PHN11_OH43_0142/CG102	10.4687	16.0395	765.7470	61.4616	63.1617	94.9738	205.6158	0.0720
PHN11_OH43_0142/LH185	8.7465	19.0333	733.4070	66.9061	68.7861	95.5300	202.9895	0.0776
PHN11_OH43_0142/LH195	9.3693	19.4632	741.5052	70.3212	72.4279	111.5575	218.9225	0.1076
PHN11_OH43_0142/LH198	9.6043	18.2317	746.6012	69.4338	71.0201	113.3893	223.7683	0.1067
PHN11_OH43_0142/PB80	8.3793	19.6320	741.4273	67.4776	69.8827	111.2975	222.2982	0.0734
PHN11_OH43_0190/LH195	9.3867	20.1537	738.8204	70.5646	73.5648	106.5104	219.5056	0.0587
PHN11_PHG47_0172/CG102	10.0116	14.9504	757.0237	62.6334	64.7120	91.3060	204.7344	0.0623
PHN11_PHG47_0172/LH195	9.4460	19.0271	740.5482	70.4668	72.6798	106.9796	217.4638	0.0803
PHN11_PHG47_0172/LH198	9.6185	16.9473	752.1387	68.5368	70.8351	105.6968	214.4934	0.0735
PHN11_PHG47_0172/PB80	10.0738	17.4651	748.9538	68.7752	69.4231	114.9405	214.6334	0.0679
PHN11_PHG47_0251/B47	8.7508	16.5239	726.6250	67.9612	69.3488	100.4424	218.5856	0.0719
PHN11_PHG47_0251/CG102	10.3702	14.5722	767.2163	63.5443	65.3734	97.4032	209.4487	0.0571
PHN11_PHG47_0251/LH185	8.7718	16.5610	730.1108	67.5929	68.7447	96.9835	211.3259	0.0719
PHN11_PHG47_0251/LH195	9.4739	17.7596	725.1780	69.7660	71.0799	96.5624	208.3739	0.0361
PHN11_PHG47_0251/LH198	9.2649	15.2611	748.4537	67.9161	69.4110	106.2300	218.5608	0.0681
PHN11_PHG47_0385/B47	9.8695	17.0816	760.3411	69.3154	68.8222	96.8066	234.4907	0.0757
PHN11_PHG47_0385/CG102	10.6872	15.0239	768.6315	63.6157	65.3945	104.3920	219.9029	0.0900
PHN11_PHG47_0385/LH185	8.6885	17.9428	743.6423	69.8383	71.3651	102.4243	206.0566	0.0537
PHN11_PHG47_0385/LH198	9.7774	18.0709	762.7597	69.1390	70.7170	105.0036	222.3919	0.0685
PHN11_PHG47_0390/B47	9.0395	17.4712	740.7302	68.7029	70.0531	107.0263	228.7007	0.0854
PHN11_PHG47_0390/CG102	13.6725	22.2647	706.2744	64.7600	67.5369	82.5615	212.1800	0.0020
PHN11_PHG47_0390/LH198	9.0040	17.1805	742.1865	69.9298	72.7440	107.9367	223.3339	0.0755
PHN11_PHG47_0390/PB80	9.2704	18.5391	737.5664	68.7482	70.3885	109.0740	220.5605	0.1595
PHN11_PHW65_0015/B47	9.6801	17.6708	740.2856	68.0976	69.0565	101.3237	221.0017	0.0919
PHN11_PHW65_0015/CG102	11.1866	15.5433	788.6542	63.9095	65.2668	89.9657	209.3923	-0.0092
PHN11_PHW65_0015/LH185	10.1000	20.0670	728.9972	68.6134	69.9920	91.7745	212.3610	0.0708
PHN11_PHW65_0015/LH195	9.4744	19.9569	741.2857	71.2526	72.6586	99.7069	212.3811	0.0819
PHN11_PHW65_0015/LH198	9.8532	17.4014	753.7210	69.1679	71.9472	110.7976	222.9572	0.0695
PHN11_PHW65_0065/B47	8.4474	17.9790	739.7293	68.6326	71.1036	95.1192	199.7515	0.0838
PHN11_PHW65_0065/LH195	9.5134	19.1779	740.9907	71.7783	74.0787	99.3310	211.4644	0.0609
PHN11_PHW65_0065/PB80	10.2655	19.0091	738.8595	70.1878	72.2026	106.5600	225.1813	0.0572
PHN11_PHW65_0101/B47	9.3707	17.9571	743.0188	68.7115	70.5122	98.7197	221.7669	0.0728
PHN11_PHW65_0101/LH195	10.2020	19.7582	752.3121	71.5892	73.5449	99.8024	213.2293	0.0626
PHN11_PHW65_0237/B47	9.4177	18.4724	732.4973	69.7469	70.6226	114.1387	229.7924	0.0722
PHN11_PHW65_0237/LH195	10.6840	19.6241	736.4497	72.7106	73.9048	111.8557	230.5716	0.0616
PHN11_PHW65_0237/PB80	10.7033	19.3579	740.3861	71.1582	73.1750	123.8558	244.0419	0.1491
PHN11_PHW65_0275/B47	9.3114	16.9137	744.0791	68.8344	72.1924	96.4308	214.3391	0.0772
PHN11_PHW65_0275/CG102	9.9854	16.2647	752.6130	65.7395	69.5264	89.5615	223.3022	0.0511
PHN11_PHW65_0275/LH185	10.0307	20.8882	716.4805	69.6158	71.1258	87.1631	206.3037	0.0643
PHN11_PHW65_0275/LH195	9.9548	19.8479	728.5206	72.5222	74.0213	101.9783	213.2690	0.0446
PHN11_PHW65_0275/LH198	9.8537	17.9892	745.7714	69.8203	72.5598	101.9549	221.5439	0.1095
PHN11_PHW65_0275/PB80	9.3971	18.6138	728.5238	69.2598	71.2860	112.2337	229.6456	0.0853
PHN11_PHW65_0294/B47	9.8557	18.0464	722.2333	68.1277	68.8569	99.9804	215.5834	0.0951
PHN11_PHW65_0294/CG102	9.9236	16.6535	739.0718	64.5725	66.0130	102.5347	213.1174	0.0731
PHN11_PHW65_0294/LH195	9.9302	21.1575	725.7798	70.8344	72.0814	100.8148	211.1848	0.0698
PHN11_PHW65_0294/LH198	10.0583	20.6459	720.1670	69.9549	71.5681	107.8778	224.1107	0.1149
PHN11_PHW65_0312/B47	9.0729	17.9426	754.8074	68.4157	70.3988	90.7931	204.5112	0.0548
PHN11_PHW65_0312/CG102	9.5019	14.3487	773.2422	62.6851	64.2589	88.7287	197.0300	0.0628
PHN11_PHW65_0312/LH195	8.9226	19.4358	751.3416	71.2814	72.3177	97.7190	214.3822	0.0467
PHN11_PHW65_0312/LH198	8.5660	17.6253	763.8886	68.8379	70.4154	103.2361	209.5461	0.0733
PHN11_PHW65_0312/PB80	9.5528	18.3896	745.3289	72.8176	75.4193	113.3495	233.1390	0.1048
PHN11_PHW65_0323/B47	9.5887	17.4385	741.1058	69.9184	71.3892	109.4039	229.9710	0.0819
PHN11_PHW65_0323/LH195	9.2696	19.7440	735.1268	72.3483	74.4064	104.7646	219.2166	0.0618
PHN11_PHW65_0359/B47	8.9596	18.9533	738.4467	68.6610	69.3560	89.1924	202.2173	0.0580
PHN11_PHW65_0359/CG102	12.3427	13.8647	783.5055	64.0682	65.3713	107.5615	222.6879	0.0020
PHN11_PHW65_0359/LH185	9.3050	19.0741	728.4254	69.0887	69.6322	89.7504	204.8099	0.0880
PHN11_PHW65_0359/LH195	9.2706	19.6812	742.0981	71.5753	72.9854	91.3467	197.2357	0.0585
PHN11_PHW65_0359/LH198	9.8241	18.1057	753.6698	70.8578	72.2038	100.3732	212.4220	0.0796
PHN11_PHW65_0359/PB80	8.8697	19.6373	730.2389	71.1308	73.1691	113.7563	231.5448	0.1425
PHN66/LH123HT	10.4378	18.0478	743.2303	69.8264	71.0880	113.4789	238.5159	0.0497
PHN66/LH185	10.5963	17.1466	724.8371	67.6429	69.1715	97.2132	210.4064	0.0355
PHN66/LH38	9.9027	16.6975	725.8848	66.4859	67.9814	101.9673	212.4916	0.0562
PHN66/LH51	10.1828	16.6336	727.9703	67.5558	68.9259	108.3450	225.3863	0.0452
PHN66/LH82	9.7608	17.0166	737.4778	66.3309	67.6809	97.1425	202.0933	0.0356
PHN66/PHG29	10.2702	16.1940	738.1724	66.6128	68.8766	111.3514	218.4322	0.0476
PHN66/PHG47	9.7177	15.6403	725.3454	66.8055	68.3913	104.9446	215.4107	0.0166
PHN66/PHG83	10.2576	17.0155	739.1463	69.1191	70.6198	120.3543	228.3742	0.0494
PHN66/PHK56	10.6592	16.1002	716.7064	69.0660	70.4925	114.4535	227.2007	0.0493
PHN66/PHK76	9.2450	16.9867	756.1585	66.7909	67.9831	104.7639	218.5696	0.0846
PHN66/PHN82	11.3335	17.0176	739.3803	68.1079	70.5258	106.1296	215.0075	0.0203
PHN66/PHW30	11.0827	16.3301	724.5489	68.2695	70.1352	109.9333	232.3681	0.0030
PHN66/PHZ51	9.8902	16.7696	749.8554	68.0968	70.1202	119.9746	240.2907	0.0526
PHN66/Q381	8.9004	16.1458	725.3074	66.7026	69.0605	107.5712	213.1594	0.0138
PHN82/B47	10.4172	18.0100	750.4148	68.8915	71.0431	97.4773	212.8713	0.0400
PHN82/LH145	10.0150	15.9952	767.1410	66.9364	68.6087	94.6901	206.3985	0.0655
PHN82/LH82	8.4971	18.5035	737.2616	67.6606	69.3148	85.4550	201.6620	0.0436
PHN82/PHHV4	12.2714	17.3328	766.1533	68.1116	70.6341	102.0969	224.6562	0.0266
PHN82/PHRE1	10.5591	16.3258	759.4628	65.1733	66.1539	102.7660	205.7356	0.0763
PHN82/PHZ51	10.1174	18.3106	740.5867	70.5175	72.6464	101.2876	221.4218	0.0639
PHN82/S8324	11.1847	17.7951	761.0103	65.5425	68.1832	89.5779	207.9305	0.0443
PHP02/B47	9.4858	17.3657	730.9254	66.8027	68.5601	102.9086	217.8172	0.0956
PHP38/LH123HT	9.7731	18.6388	739.2594	72.8169	74.9312	112.9620	241.1870	0.0744
PHP38/LH185	9.7333	17.7641	726.2498	70.0977	71.7802	98.5802	225.9185	0.0340
PHP38/LH210	10.2263	18.7785	744.2167	70.5268	72.8385	119.2608	244.1654	0.0427
PHP38/PHJ65	9.2535	19.8054	747.8088	70.9405	73.5448	108.7047	236.9021	0.0349
PHP38/PHM49	9.0228	19.4056	734.6341	72.0979	74.7393	98.9113	215.3456	0.0422
PHP38/PHN47	10.5145	19.0574	737.3597	72.8598	75.3828	116.4118	234.5954	0.0624
PHP38/PHN82	10.3892	20.2901	738.9010	71.4037	73.8746	103.6905	220.8082	0.0400
PHP38/PHP60	9.7902	19.2629	762.9387	71.6480	73.0992	110.8574	234.4752	0.0779
PHP38/PHR03	10.3819	18.6075	750.4987	72.2626	74.6516	116.9372	244.2730	0.0516
PHP38/PHR63	9.8554	20.0295	750.2886	70.5849	72.4343	97.8497	222.1898	0.0743
PHP38/PHW30	10.2212	18.6532	744.1364	70.0640	72.6382	112.4663	235.5148	0.0503
PHP38/PHW53	9.6179	17.6080	744.9999	70.0912	73.5778	101.8404	222.8172	0.0468
PHP38/Q381	8.9163	17.6050	747.1033	68.7247	71.1488	99.6207	206.9618	0.0276
PHP85/3IIH6	10.1043	16.5578	725.5523	68.9145	70.1554	106.6600	230.6299	0.1026
PHR25/B47	9.4359	15.3959	724.2585	64.8278	65.5443	94.7853	219.1285	0.0850
PHR25/LH82	7.0476	16.9351	714.7927	63.1594	65.2632	85.4780	187.9706	0.1082
PHR25/PHZ51	7.8926	15.6286	762.8960	65.6756	67.6354	108.6562	224.9170	0.0776
PHRE1/LH162	7.4509	14.8803	798.5378	63.3972	63.8025	93.0266	194.0450	0.0803
PHRE1/LH82	9.3618	15.4023	745.8583	63.0635	64.3128	87.6385	192.3313	0.0821
PHRE1/PHR25	7.9437	15.0531	766.3500	62.0982	61.9343	95.0027	196.8569	0.0605
PHRE1/PHZ51	9.0830	15.6107	758.8962	65.4930	66.8439	110.4200	218.2818	0.0630
PHT55/B47	8.5669	18.5825	730.6817	72.7588	73.2952	115.0903	237.1926	0.0602
PHT55/LH82	10.2065	19.9824	735.3088	68.6061	70.3626	96.2747	206.2921	0.1017
PHT55/PHZ51	10.3153	18.2757	742.3130	71.6554	73.4938	128.5710	252.7936	0.0536
PHT69/3IIH6	9.3745	15.4304	725.8160	66.3951	68.2045	111.5947	218.9082	0.0927
PHT69/LH82	9.6071	17.4041	750.8546	63.7236	64.2985	78.6682	187.4553	0.1177
PHT69/PHZ51	8.4027	16.8945	746.9931	66.1847	68.4148	110.2789	212.3602	0.1161
PHV37/3IIH6	9.2719	15.2905	709.1409	66.5080	68.0474	96.9792	219.1567	0.1009
PHV63/B47	9.9358	18.6410	729.5874	73.2892	NA	92.7383	223.3888	NA
PHV63/LH123HT	9.6528	19.0773	737.7643	71.6181	73.9468	108.1828	224.4150	0.0744
PHV63/LH185	9.0893	18.1979	733.8267	69.3706	71.7123	95.8186	207.5052	0.0659
PHV63/LH195	8.0776	21.3198	731.9211	74.3622	76.6342	104.2814	215.5368	0.0813
PHV63/LH210	9.9856	19.2654	736.2273	71.2368	73.7186	115.0373	229.1345	0.0598
PHV63/LH82	7.9019	18.6712	735.1757	68.9526	70.7847	73.1412	182.3137	0.0754
PHV63/NK787	10.1270	20.5192	734.2648	74.9273	77.1027	110.0630	250.0476	0.1001
PHV63/PB80	9.6795	19.4826	737.1556	72.1921	74.2013	110.7894	223.5762	0.0633
PHV63/PHJ65	10.3275	19.9454	733.7717	73.2708	74.7896	115.3742	239.5574	0.1283
PHV63/PHM49	9.4647	18.9335	723.4622	72.1454	74.3049	103.1354	217.8120	0.0654
PHV63/PHM57	10.7941	19.7401	733.3958	73.8838	76.1753	109.7540	232.3325	0.0839
PHV63/PHN47	10.1111	19.5063	720.6795	73.4365	76.1312	124.5153	238.4719	0.1225
PHV63/PHN82	9.5080	18.8364	735.1371	71.6045	73.6564	104.8972	219.6356	0.0428
PHV63/PHP60	10.2900	19.7790	729.8084	71.8588	72.9779	114.7469	228.5989	0.1158
PHV63/PHR03	9.0842	18.8437	738.4965	70.2056	73.1999	115.2390	226.5702	0.0685
PHV63/PHR63	9.4039	18.8278	729.9869	69.1045	71.3580	105.2992	217.7380	0.0825
PHV63/PHW30	9.3384	18.0761	725.7228	70.8950	72.9850	113.9774	235.4077	0.0856
PHV63/PHW53	9.7226	17.8492	738.3564	71.2641	73.9468	104.6266	221.2956	0.0620
PHV63/PHZ51	8.9120	18.2866	730.9227	70.4950	73.4565	110.1290	232.5594	0.0820
PHV63/Q381	8.1224	17.4701	721.2214	68.3994	70.4374	102.9289	218.1794	0.0670
PHW03/LH145	9.2517	15.6377	807.0310	65.1979	66.7038	111.0458	233.8866	0.0884
PHW03/S8324	9.7086	17.4017	795.5347	65.2588	66.1296	87.8648	216.5649	0.0394
PHW30/B47	10.5089	17.2405	747.3522	68.2960	70.5988	103.5522	223.3689	0.0617
PHW30/LH82	8.9511	17.4991	747.9919	65.8160	67.9750	91.8691	198.3178	0.0535
PHW30/PHZ51	10.7297	17.2337	744.2947	71.5215	72.0958	106.9709	244.7168	0.0262
PHW52/LH123HT	10.0498	19.4938	732.1701	71.9561	73.2836	112.6677	234.7337	0.0390
PHW52/LH185	10.9141	18.8048	724.1232	69.7230	71.5461	95.5414	215.8770	0.0421
PHW52/LH210	10.3896	19.4435	740.2282	71.6181	74.0863	112.4484	232.9367	0.0485
PHW52/LH38	10.1329	18.4355	727.6519	69.0964	71.2653	83.6208	196.0636	0.0302
PHW52/LH51	9.6835	18.6522	725.5937	69.5456	72.1839	101.2852	223.2759	0.0773
PHW52/LH82	10.7571	19.0337	735.2458	68.2115	69.7133	90.6053	193.9009	0.0245
PHW52/NK787	11.0805	21.1451	732.5842	72.8745	75.0992	106.8796	252.8664	0.0684
PHW52/PHG29	10.1636	18.4617	743.4891	68.0960	70.2988	96.0616	212.8197	0.0436
PHW52/PHG35	10.3872	18.2304	743.8178	70.7136	72.4524	103.0950	218.1602	0.0722
PHW52/PHG47	9.4594	17.4136	750.5821	68.4798	70.6633	91.0091	210.6769	0.0332
PHW52/PHG83	8.5875	18.4449	755.5984	71.2138	73.4493	99.2405	210.6287	0.0611
PHW52/PHJ65	10.3711	20.3532	729.5231	72.2065	75.0841	112.1637	251.6429	0.0857
PHW52/PHK56	11.7010	18.2453	732.8044	69.0733	71.0369	93.4293	219.1049	0.0390
PHW52/PHK76	9.6487	17.8396	769.5841	68.0910	69.6663	95.8829	208.0586	0.0801
PHW52/PHM49	10.1068	20.0549	738.1409	71.5554	74.1589	105.3712	222.4857	0.0594
PHW52/PHN47	10.1994	19.9910	720.9241	73.6040	75.5692	112.1234	233.1056	0.0749
PHW52/PHN82	10.4493	19.8155	741.5781	70.6926	73.1548	98.4775	221.9838	0.0593
PHW52/PHP60	10.3866	20.0110	752.5079	72.4751	74.0891	107.3218	233.0362	0.0636
PHW52/PHR03	12.0926	19.2337	747.7335	72.8796	75.2351	115.6954	242.4647	0.0448
PHW52/PHR63	10.3122	20.1169	739.0608	69.1441	71.9894	102.0915	218.1394	0.0334
PHW52/PHW30	11.5859	18.1440	746.1782	70.0304	71.8966	109.9348	240.7040	0.0470
PHW52/PHW53	10.2182	18.3756	747.1871	70.3802	73.4625	106.2545	232.4011	0.0354
PHW52/PHZ51	11.0496	17.9212	742.8349	69.6075	71.8157	109.7038	234.3490	0.0255
PHW52/Q381	9.2059	18.3592	743.7730	68.0696	70.5173	98.4284	215.6938	0.0279
PHW52/TX205	10.4617	20.2405	706.4046	72.8318	74.9412	114.9809	238.1009	0.1211
PHW53/B47	9.2014	17.9669	744.3274	68.3199	70.9408	95.5282	217.8413	0.1150
PHW53/LH123HT	10.0133	18.8231	715.0813	71.7716	73.8937	105.2514	236.2837	0.0586
PHW53/LH82	6.8780	17.9702	749.1657	66.6023	68.1346	74.1415	173.0102	0.1602
PHW53/PHZ51	5.7958	17.8507	749.8125	71.7117	74.8183	96.9221	206.4525	0.1117
PHW65/B47	9.7554	18.1987	750.9928	69.7917	71.2051	104.6776	219.0401	0.0724
PHW65/LH82	9.5499	17.6763	735.1305	69.0456	71.0059	96.2667	195.8249	0.0714
PHW65/PHZ51	8.2698	17.7462	758.2623	72.0736	73.8716	102.8978	224.8710	0.0660
PHW65_MOG_0012/B47	9.9985	17.8271	735.7012	67.3554	NA	104.6628	221.7663	NA
PHW65_MOG_0012/LH185	10.3637	20.7333	726.6296	70.5100	72.1950	101.3423	224.5178	0.0760
PHW65_MOG_0012/LH195	10.5001	19.4490	736.3319	72.8433	74.1111	104.6372	210.0836	0.0700
PHW65_MOG_0012/LH198	10.1813	18.4530	732.7754	69.9929	70.7915	101.5860	219.2012	0.0652
PHW65_MOG_0012/PB80	10.4807	21.1545	722.6066	70.8177	72.2810	107.6395	207.9305	0.0469
PHW65_MOG_0029/B47	9.6459	18.6418	735.5024	70.4956	71.6637	109.6510	223.8699	0.0945
PHW65_MOG_0029/LH195	10.5993	20.7228	739.3309	72.6923	74.3021	110.2430	221.1073	0.1343
PHW65_MOG_0029/PB80	9.5577	19.3758	737.0943	71.7595	72.4937	122.6196	238.2255	0.1234
PHW65_MOG_0137/B47	9.8488	18.7339	751.4153	70.5712	71.4219	100.1053	226.4820	0.0927
PHW65_MOG_0137/CG102	10.6497	15.1647	764.1977	65.0905	67.1654	112.5615	220.4290	0.4418
PHW65_MOG_0137/LH185	9.9738	20.8903	709.0603	69.3795	71.4271	95.6717	225.7596	0.0748
PHW65_MOG_0137/LH198	10.1365	18.9686	740.2478	70.1269	72.6149	116.7616	229.3288	0.1664
PHW65_MOG_0176/B47	8.0634	17.0072	730.9866	69.0741	72.0351	107.3704	213.5901	0.1005
PHW65_MOG_0176/CG102	10.2527	14.8708	773.2080	61.5704	64.1058	89.0514	203.4297	0.0521
PHW65_MOG_0176/LH185	9.5539	18.1983	719.0517	68.5468	70.2441	92.6885	213.5047	0.0877
PHW65_MOG_0176/LH195	10.2276	18.7275	722.1761	71.4400	73.6517	106.2206	221.6183	0.0697
PHW65_MOG_0176/LH198	8.7658	17.3224	739.0719	68.7795	71.4881	107.8947	213.3418	0.0983
PHW65_MOG_0176/PB80	9.7473	18.2889	723.7633	68.5451	70.8308	111.4356	224.9892	0.1173
PHW65_MOG_0271/B47	9.9344	17.9608	729.7013	70.8102	70.9063	117.4702	236.0940	0.1530
PHW65_MOG_0271/CG102	9.6277	17.4768	734.5924	65.7016	66.8112	128.3229	237.7167	0.0377
PHW65_MOG_0271/LH185	10.4026	19.4293	708.9931	69.9208	72.2059	107.9859	228.3555	0.0802
PHW65_MOG_0271/LH198	8.7911	17.8660	742.5226	73.6731	75.9947	88.0609	188.2045	0.1241
PHW65_MOG_0271/PB80	10.8382	19.2939	726.0963	70.5133	72.2886	119.6661	240.3705	0.1697
PHW65_MOG_0311/B47	9.3696	19.1766	727.0612	71.0565	72.3093	112.2513	228.7100	0.2207
PHW65_MOG_0311/LH195	9.4258	20.1387	719.5853	72.5588	75.0973	112.9505	229.1986	0.1378
PHW65_MOG_0311/PB80	9.4769	19.4501	731.3840	71.5572	73.5940	123.9415	242.0879	0.1015
PHZ51/LH82	8.0221	17.5377	745.2999	66.9359	69.9736	93.1770	209.1988	0.1210
Q381/B47	8.8766	16.4170	738.6833	66.7915	69.3073	100.6960	209.0036	0.0865
R226/LH82	8.3694	18.6543	713.6201	69.8082	71.1030	103.3211	194.9853	0.1051
R226/PHZ51	8.9707	18.0452	723.9820	72.1632	73.6314	131.1227	242.9368	0.1080
R227/LH82	8.4290	18.7208	728.2256	67.9812	71.4611	95.5254	201.4715	0.3469
R227/PHZ51	9.0023	19.6173	731.7669	71.1857	74.3696	123.0699	245.5803	0.5379
R229/3IIH6	10.2313	17.3990	722.6052	69.5882	71.5943	122.0928	232.3308	0.0750
REDEAR-B/LH195	9.0267	23.2905	729.0861	74.1209	77.2073	128.4513	239.4937	0.1040
S8324/3IIH6	10.7596	15.4766	749.0353	65.0810	65.8838	95.1659	218.6955	0.0649
S8324/LH162	8.6756	15.4837	813.1551	63.8223	64.9967	87.7184	198.0217	0.0905
S8324/PHK05	6.6486	14.7670	777.2546	60.0834	61.1903	87.9583	201.5628	0.1594
S8324/PHK56	11.2635	16.8220	766.7147	65.0760	68.3455	87.1305	214.3560	0.0574
S8324/PHR25	8.8464	15.7584	759.1663	62.8077	63.9972	89.0187	203.9775	0.0769
S8324/PHZ51	11.5094	16.3923	761.1866	66.1106	68.7219	104.3739	230.1741	0.0552
S8326/B47	9.9190	17.0330	754.7000	68.2821	70.3574	112.8282	233.6375	0.2222
S8326/LH145	7.8275	15.7776	783.3668	66.2983	68.3471	105.3860	219.5513	0.1742
S8326/PHHV4	11.3033	16.8680	772.3058	68.5760	69.5757	117.1905	235.5315	0.1082
S8326/PHRE1	9.0073	15.9126	786.1356	65.2407	65.9119	111.7252	212.7144	0.1082
S8326/S8324	10.8937	17.3699	764.2546	66.6918	68.9080	102.0368	223.0960	0.1077
SD101/3IIH6	8.5257	16.1566	728.1199	67.8689	70.1185	105.0356	213.5426	0.1552
SD101/B47	6.5019	18.0418	739.6627	69.3201	71.0097	109.6358	214.8734	0.2303
SD101/LH82	8.1608	17.4960	737.0594	66.6976	68.0615	90.0712	186.2313	0.1447
SD101/PHZ51	8.4532	17.4876	756.1321	69.2401	70.4853	121.8130	239.2224	0.2043
SD107/LH82	8.4614	16.8562	729.7518	66.8887	69.1745	101.6808	211.5052	0.2818
SD107/PHZ51	8.5097	16.2971	735.5682	70.3964	73.1887	112.6716	239.1145	0.1227
TR9-1-1-6/3IIH6	7.6064	16.4912	724.2727	69.8009	72.3128	120.9701	236.7863	0.2181
TX130_RP/B47	8.9305	18.9122	741.6184	71.8351	73.0079	116.2728	237.1012	0.2316
TX130_RP/LH185	7.6272	19.7783	728.1728	71.6401	74.6165	102.0421	229.2722	0.0740
TX130_RP/LH198	8.3321	20.7553	730.2463	74.2560	78.2019	123.1171	234.4581	0.1658
TX205/B47	10.3447	18.0917	713.1621	70.9085	71.7358	114.8311	238.2747	0.1701
TX205/LH185	9.9048	15.4281	752.9212	70.7000	72.2576	98.4216	228.8664	0.1303
TX205/LH195	10.6653	20.3542	697.2757	74.1167	76.4914	119.5385	240.0972	0.0756
TX205/LH198	9.0573	18.9859	727.2875	74.3300	76.3362	117.7940	226.6410	0.1493
TX205/PB80	10.9586	19.3448	707.9478	73.0082	74.1076	120.0114	232.4398	0.1238
TX29A/PHZ51	8.6973	19.0188	728.2774	72.2106	75.8089	125.1156	265.6597	0.1221
TX303/B47	9.4084	20.4206	711.5039	73.7609	75.7783	126.5913	246.8304	0.1270
TX303/LH195	10.0892	22.5165	709.9258	75.1451	77.9171	133.9293	248.6633	0.0933
TX303/LH198	8.9009	21.1995	722.7729	72.1447	75.6682	120.0976	234.4646	0.1801
TX303/LH82	9.7004	20.4346	710.1348	72.0146	74.2800	127.1242	238.6389	0.2041
TX303/PB80	10.8364	20.5320	716.2878	73.0089	75.7747	138.3255	246.9559	0.1670
TX303/PHZ51	9.3624	19.1719	709.9466	73.2568	76.6739	131.8212	258.8968	0.1282
TX303/TX777	9.8217	23.9876	693.1515	76.9337	81.2672	136.2203	260.4467	0.1287
TX601/PHZ51	8.0066	18.7083	NA	72.8041	75.1887	124.0738	240.9429	0.4659
TX61M/B47	8.0434	18.6801	743.9007	70.2966	71.3128	116.1276	235.8888	0.3378
TX61M/PHZ51	10.0843	19.5902	736.8212	70.6252	73.7162	130.5203	247.0918	0.2849
TX6252/TX714	9.7285	19.7519	717.1199	69.1003	73.0236	115.8313	240.0575	0.0849
TX714/LH185	11.4648	19.5263	724.5108	70.2097	72.0096	111.1675	225.4057	0.0672
TX714/LH198	7.4162	19.4045	735.4192	73.4452	75.1893	114.6456	218.6433	0.0791
TX714/PHZ51	9.6034	17.9025	741.2751	71.1526	73.6566	131.1049	248.2303	0.0651
TX714/TX777	9.1852	23.3208	695.6703	76.5376	80.8530	154.1103	266.5461	0.0536
TX740/LH185	10.0332	22.8682	730.4204	75.4899	78.0518	123.2569	248.8046	0.0717
TX740/LH195	9.1854	23.0760	692.8178	74.0709	77.3351	125.0520	243.3605	0.0644
TX740/LH198	9.0698	22.2819	720.6020	77.4489	81.6651	133.5394	250.3475	0.1934
TX745RP/B47	9.4356	19.0390	728.9681	72.1540	72.8794	106.4349	226.5439	0.1907
TX745RP/PHZ51	10.2646	18.8697	729.3103	72.4037	73.7328	108.7689	235.2696	0.0705
TX768/B47	8.4275	19.3745	747.0223	67.3271	69.1073	96.8695	208.7327	0.0844
TX768/PHZ51	8.5960	18.4728	753.3551	67.7603	71.3877	110.4817	222.3294	0.1157
TX770/B47	8.7405	18.9523	739.1281	72.8964	74.5697	126.6146	237.1204	0.2787
TX770/LH195	10.7838	19.9407	729.3708	75.2905	77.8481	127.1068	243.9791	0.1074
TX772/B47	9.0384	20.4225	715.5826	72.8352	75.2181	122.1942	231.9755	0.2403
TX772/LH185	9.2535	24.5638	712.3523	71.6654	73.6976	96.2849	213.7968	0.1491
TX772/LH195	9.5874	22.3763	715.2792	72.5967	74.6773	105.9951	220.4867	0.1239
TX772/LH198	9.4934	21.8594	723.4572	71.7044	73.9484	111.4920	224.8584	0.1179
TX772W/B47	9.2752	19.6503	741.7428	71.0183	71.5511	112.0056	217.9084	0.1554
TX772W/LH185	9.4539	22.0719	724.2913	70.6200	71.9746	99.4177	212.6483	0.0620
TX772W/LH195	9.2499	21.6623	717.9871	73.1976	74.8792	106.5795	216.5377	0.0509
TX772W/LH198	8.4528	21.9283	709.5665	71.8738	72.2390	118.6091	224.5518	0.1298
TX802/PHZ51	9.1010	19.5773	755.4854	71.4751	74.6648	130.4206	232.6709	0.4105
TX803/PHZ51	10.5356	20.8045	740.0391	72.5632	75.2181	119.2803	235.0856	-0.0456
TX81/PHZ51	9.7795	19.1941	736.0218	71.3366	75.1612	136.1102	263.5340	0.1399
VA35/LH195	9.0253	21.0939	746.8441	73.2455	74.7986	118.0284	231.1864	0.1575
W10001_0003/B47	7.3364	17.9413	737.5930	67.1989	69.2365	110.8442	224.1803	0.2775
W10001_0006/B47	7.5165	17.1589	710.2865	65.1788	66.7936	103.4940	228.8753	0.2033
W10001_0007/B47	6.8642	17.7134	727.7910	66.9608	69.4895	109.6377	219.7183	0.4273
W10001_0009/B47	6.9355	18.5442	754.2127	65.4104	67.6665	120.3075	225.2279	0.1898
W10001_0010/B47	9.4669	18.4250	728.9886	66.8318	68.1050	99.2647	223.6024	0.0856
W10001_0011/B47	8.1584	18.0853	737.3487	67.8142	71.4962	101.2038	206.8658	0.2344
W10001_0012/B47	5.6979	17.0675	721.7935	66.2589	68.7227	94.2404	204.3276	0.3437
W10001_0013/B47	6.9359	16.4754	727.3538	66.3104	67.9232	106.0419	213.7859	0.2123
W10001_0014/B47	7.6824	16.7654	730.8679	66.7796	68.4881	115.0280	224.9640	0.2724
W10001_0016/B47	5.6052	16.8763	722.3927	65.0344	66.7992	85.5661	184.9439	0.0961
W10001_0018/B47	7.7997	16.4043	740.1004	64.0816	67.5096	107.7039	220.7446	0.3424
W10001_0019/B47	6.5169	16.5256	715.1723	65.7642	67.3157	95.4551	219.6666	0.2588
W10001_0023/B47	7.3600	18.5903	721.0225	66.7016	68.0846	99.1305	201.5245	0.1554
W10001_0033/B47	8.2603	17.2994	740.9200	67.0435	68.1133	108.8890	227.2050	0.2574
W10001_0047/B47	8.8928	17.0850	751.8730	70.5446	71.0745	96.5457	212.5363	0.1275
W10002_0001/B47	8.0103	17.8881	723.4618	67.6307	68.0888	109.9571	215.1417	0.2624
W10002_0002/B47	8.6827	16.0224	740.2062	66.7040	67.1736	97.3414	214.8063	0.2320
W10002_0004/B47	8.6769	17.5048	738.8518	68.6609	70.6241	111.0783	222.5795	0.2203
W10004_0007/3IIH6	9.0338	15.7005	739.6309	68.9733	70.1252	109.9683	222.7282	0.1063
W10004_0008/3IIH6	10.1724	15.6795	735.8448	68.8095	69.9329	119.4993	230.1179	0.0785
W10004_0032/CG102	9.2628	14.5707	770.9426	63.9361	65.1979	98.7419	203.2564	0.0654
W10004_0032/LH185	8.9388	17.6212	738.4388	67.0939	67.6701	89.3674	200.5835	0.1142
W10004_0032/LH82	9.6391	17.6044	752.3021	66.0858	67.0864	87.6029	178.7432	0.0771
W10004_0032/PB80	10.0998	19.3210	762.2126	70.1502	71.4369	117.3721	214.4893	0.0846
W10004_0032/PHZ51	9.6586	17.3572	754.9524	68.2253	69.1258	111.0048	224.9596	0.1113
W10004_0041/3IIH6	9.9033	15.7466	726.6574	68.0327	69.4792	120.8258	235.1361	0.1137
W10004_0045/3IIH6	9.6943	16.0352	723.3242	68.6007	70.0905	125.2933	237.3944	0.1666
W10004_0062/3IIH6	7.2633	15.6602	711.4002	68.4796	70.8064	95.3630	207.0412	0.1320
W10004_0072/3IIH6	8.9640	15.5387	729.2557	69.0034	70.2517	120.2517	234.1514	0.1252
W10004_0076/LH185	9.1757	17.4285	729.3721	68.3728	70.5071	93.4072	210.0957	0.0858
W10004_0076/LH82	9.2174	16.1586	749.3478	65.9061	68.7159	99.5008	202.8436	0.1080
W10004_0076/PHZ51	8.7159	17.0476	757.0676	69.2784	72.5664	119.6160	236.2606	0.1178
W10004_0080/3IIH6	9.8849	15.9423	729.9026	69.2509	70.6126	119.2219	235.6440	0.1354
W10004_0095/3IIH6	7.1970	15.7015	719.0585	68.8387	70.6723	122.4597	231.6004	0.4189
W10004_0097/CG102	8.4867	14.8569	745.6164	63.7198	65.1933	101.4877	234.5171	0.1188
W10004_0097/LH195	7.9899	17.1095	757.3327	71.4271	72.1299	97.1846	206.7566	0.0858
W10004_0097/LH82	9.1188	17.3282	744.7299	65.8453	66.9724	88.4812	189.5896	0.1603
W10004_0097/PB80	8.7704	19.6201	753.7126	67.6309	70.0814	122.9506	231.6114	0.0994
W10004_0097/PHZ51	8.8688	16.8149	746.5893	67.8580	69.0714	102.1173	220.9897	0.2335
W10004_0121/3IIH6	8.7089	15.4367	729.8222	68.4968	69.4974	118.6722	232.1517	0.0811
W10004_0127/LH195	8.2994	17.1739	747.6724	71.0476	73.0018	117.4439	232.4943	0.0813
W10004_0127/LH82	8.3692	16.4025	740.5670	66.1376	67.2203	100.5422	201.8244	0.1737
W10004_0127/PHZ51	8.8018	16.3291	753.2597	69.4672	70.9055	120.2207	236.8264	0.1352
W10004_0140/3IIH6	8.4316	15.1984	728.8687	68.7098	70.3408	127.2538	240.7820	0.1729
W10004_0148/3IIH6	10.1942	15.2957	732.1557	68.5544	69.6708	128.4051	244.5843	0.1797
W10004_0178/3IIH6	10.0247	16.1303	731.1163	67.7212	69.3727	107.0436	224.9453	0.0795
W10004_0204/LH198	10.4997	20.1243	715.5111	71.9623	74.0016	104.4254	215.3505	0.1015
W10004_0204/LH82	7.7246	18.7427	723.7240	65.6986	68.7184	103.4362	209.6640	0.1630
W10004_0204/PHZ51	8.8516	17.6924	730.1272	70.2763	72.4962	111.0486	237.2064	0.0727
W10004_0208/3IIH6	9.4681	15.8785	733.1987	67.6650	69.1889	122.3871	242.9370	0.0937
W10004_0212/3IIH6	9.7333	15.9332	723.0201	68.8330	70.2623	120.1536	239.7287	0.1325
W10004_0225/3IIH6	9.6097	16.1751	725.4948	67.9248	69.2908	116.9789	224.4874	0.0704
W10004_0232/LH185	8.9505	17.5167	691.8466	68.8847	71.2062	108.5477	231.5420	0.1028
W10004_0232/LH198	6.3785	17.8971	739.1036	71.9463	71.4557	99.6516	193.5041	0.1017
W10004_0232/PHZ51	9.3180	16.9554	727.7794	69.0602	72.2509	122.8735	246.7606	0.1227
W10004_0258/3IIH6	9.0188	14.7749	703.7810	67.7620	68.6665	119.2662	235.4188	0.1995
W10004_0292/3IIH6	8.9152	15.3986	730.1047	67.2644	69.1114	98.2753	208.4659	0.1011
W10005_0029/B47	9.0885	16.3689	735.0788	66.8555	68.6865	103.9441	225.8941	0.0860
W10005_0029/CG102	9.6010	13.0301	767.2837	62.0051	64.6065	94.2413	222.3040	0.0714
W10005_0029/LH185	8.9329	17.0084	738.6361	66.6273	69.3856	99.9736	216.4356	0.0891
W10005_0029/LH198	10.9357	15.7770	762.4175	68.0897	69.9518	115.0195	233.2212	0.0889
W10005_0037/B47	9.4632	16.5415	742.0664	66.9855	69.1156	102.4292	216.7761	0.0808
W10005_0037/LH185	8.8755	16.9122	750.3488	67.9722	70.4325	93.1313	205.3439	0.0903
W10005_0037/LH198	8.8695	16.2626	764.6825	68.6096	71.2000	108.6770	219.9678	0.0491
W10005_0107/B47	8.6289	16.7725	735.7112	67.5850	69.4411	97.5909	210.5687	0.0866
W10005_0107/CG102	9.6712	13.3748	777.4934	63.4787	65.2970	88.6178	207.2783	0.0516
W10005_0107/LH185	8.6804	17.1283	732.6151	67.9481	70.1716	90.9015	205.0973	0.0791
W10005_0107/LH198	9.9596	16.6048	753.7021	68.1679	70.4322	105.9827	220.7987	0.0821
W10005_0111/B47	8.5873	17.9565	749.9241	68.3295	70.9265	99.3826	207.5290	0.0852
W10005_0111/LH195	8.9137	18.9613	751.2668	71.5734	74.0138	88.9162	200.5411	0.0982
W10005_0111/PB80	8.9623	19.3618	785.5724	67.6761	70.9098	103.2254	208.8418	0.0749
W10005_0147/B47	8.7917	16.2891	742.5326	67.2327	68.9689	95.8581	207.8523	0.0703
W10005_0147/CG102	8.0770	14.8251	747.7816	63.2495	65.1238	84.8331	206.9666	0.0787
W10005_0147/LH185	7.8772	17.5358	733.3098	67.3577	69.4240	91.0237	193.4008	0.1044
W10005_0147/LH198	9.8034	16.6085	759.5731	68.1189	70.3691	105.2929	217.6500	0.0745
W10005_0220/B47	9.5237	17.2786	749.7322	68.3804	69.5569	105.5934	209.3736	0.0973
W10005_0220/LH185	9.6739	18.5962	746.1490	68.8835	70.3326	96.4179	203.7798	0.0744
W10005_0220/LH198	10.3051	17.2839	764.5342	68.6601	71.3217	112.8499	216.0072	0.0864
W10005_0346/B47	8.4441	18.9102	732.9596	67.9232	71.0480	104.4002	220.7765	-0.0388
W10005_0346/LH195	8.9226	19.9292	737.2424	73.0480	74.6492	114.4666	232.3109	0.0546
W10006_0003/B47	7.7137	16.5929	726.9992	66.9322	69.0253	125.2764	240.2258	0.2721
W10006_0004/B47	6.2804	16.1968	735.9902	66.0698	68.2085	113.4856	226.9695	0.1933
W10008_0001/B47	8.7584	17.9141	746.6390	66.6958	67.9523	119.2157	221.0584	0.1849
W10008_0009/B47	9.0177	17.0361	730.2278	66.1685	68.9488	102.6354	222.5260	0.1252
W10008_0017/B47	8.9677	17.0390	733.6224	66.6431	67.7725	93.9960	205.9926	0.1270
W10008_0018/B47	8.9263	17.2360	732.7032	66.8550	67.8150	100.3280	212.5977	0.1978
W10008_0037/B47	7.9864	17.8280	730.1368	66.4075	68.2934	96.0029	210.2297	0.1326
W10008_0042/B47	8.8707	18.1648	728.2958	65.2962	66.7680	96.1165	211.2966	0.1991
W10008_0053/B47	9.2005	19.4077	733.8057	68.2611	69.4477	113.2693	222.1219	0.1766
W10008_0063/B47	7.5099	18.8575	748.1326	68.8294	70.2935	115.0494	208.8497	0.2700
W10008_0065/B47	7.5264	17.6801	754.8437	66.2457	68.1147	102.5036	214.4499	0.1738
W10008_0069/B47	9.5711	17.8469	729.6491	69.6971	71.3076	114.8422	230.0592	0.1846
W10008_0092/B47	7.9986	18.4810	735.0184	68.7932	71.0891	96.9840	216.2990	0.1331
W10008_0119/B47	8.2769	19.2686	748.0716	67.9762	69.2029	106.9643	225.5621	0.2509
W37A/B47	7.8991	17.0443	743.1382	66.3950	68.0636	102.8318	214.0417	0.2027
WF9/B47	7.9205	18.0815	699.9464	67.7173	70.9234	101.3458	221.3609	0.2080
WF9/C103	6.9487	18.7890	728.5634	70.8864	76.3666	119.4523	243.9731	0.1419
WF9/H95	8.3185	18.7793	733.0212	70.9725	74.0914	108.1381	232.8157	0.1880
WF9/LH195	7.9958	20.2389	729.3341	72.6143	74.1795	130.2138	236.7021	0.0974
WF9/MO17	7.6458	17.7544	714.7723	69.9494	73.7125	122.4761	242.1456	0.2070
WF9/OH43	8.3239	17.9883	720.1162	66.9456	70.4870	101.5616	226.1891	0.1860
Z013E0002/LH185	11.0608	19.6755	741.0780	70.3996	72.3455	101.9906	225.7777	0.0670
Z013E0002/LH198	7.8173	19.0512	765.7433	75.1452	77.0369	99.7288	226.8423	0.0767
Z013E0002/LH82	10.8007	20.8507	758.7794	68.6342	69.5359	106.3467	217.5376	0.1388
Z013E0002/PHZ51	10.7783	18.8958	780.2886	70.6294	72.8792	118.6573	250.2534	0.0523
Z013E0003/PB80	8.7190	19.5759	745.5590	74.2027	76.7915	107.6483	221.1699	0.0772
Z013E0006/LH185	10.8091	20.0880	709.9673	70.4146	72.8663	104.8860	227.3193	0.0746
Z013E0006/LH195	8.3605	20.1254	709.5266	75.9601	77.2118	113.9886	220.7276	0.0571
Z013E0006/LH198	9.1796	19.8258	740.1672	71.6743	75.3623	112.4554	225.5895	0.1008
Z013E0006/LH82	10.3545	18.7475	747.2307	67.1632	70.1925	93.8552	192.4183	0.0759
Z013E0006/PB80	8.8806	19.9587	742.9982	75.2226	76.8780	119.9614	226.6274	0.0814
Z013E0006/PHZ51	10.5376	20.0495	722.7815	71.5157	74.4718	113.3849	242.0157	0.0351
Z013E0007/LH185	10.7443	20.8033	695.6909	71.4108	72.6171	108.2772	220.0221	0.0855
Z013E0007/LH195	8.6439	20.4002	728.8343	74.8997	76.7480	116.2883	226.4565	0.0691
Z013E0007/LH198	8.0616	21.0305	729.6413	72.2943	75.0548	116.6538	223.0343	0.0758
Z013E0007/LH82	7.6142	18.5973	723.9345	67.8327	70.9233	82.3408	190.9472	0.0498
Z013E0007/PB80	8.5161	19.7192	733.5830	74.5510	76.6006	120.7202	222.3546	0.1272
Z013E0007/PHZ51	9.6944	18.9527	732.4362	72.7425	74.8836	127.9044	239.9265	0.0631
Z013E0009/LH195	7.8653	22.6023	719.8240	74.8056	77.3707	118.3241	215.9717	0.0068
Z013E0009/PB80	8.6101	21.3518	768.5370	75.1129	77.2914	119.6647	221.1106	0.0834
Z013E0009/PHZ51	10.4145	20.8962	748.1421	71.3487	74.5132	125.2228	235.4793	0.0273
Z013E0012/LH185	9.1746	21.3792	703.1912	72.7958	74.3213	102.2930	223.1636	0.1068
Z013E0012/LH195	8.9794	22.2028	744.8900	76.7983	78.3694	104.7307	211.2857	0.0401
Z013E0012/LH82	8.6846	18.1297	760.7829	68.6872	70.6184	83.1986	188.5902	0.1851
Z013E0012/PB80	8.3593	21.7489	736.3147	77.0025	78.9838	111.3079	216.7826	0.0475
Z013E0012/PHZ51	9.6565	19.7749	729.1560	72.8380	75.9953	130.6517	250.2967	0.0697
Z013E0014/LH185	10.6857	21.0094	731.0969	72.3671	73.6734	105.6349	227.7622	0.0642
Z013E0014/PHZ51	11.3921	19.0232	NA	71.9414	73.9274	124.5128	255.9542	0.0529
Z013E0016/PB80	8.6912	20.9254	745.9543	74.6079	75.4965	119.9129	216.1600	0.0508
Z013E0019/LH195	9.3297	21.3163	748.3228	75.0982	76.0613	108.3936	215.7815	0.0509
Z013E0019/LH198	9.1625	21.3946	729.4408	73.1513	75.6869	117.9850	225.0092	0.1279
Z013E0019/PB80	10.0370	21.1536	734.2342	73.8390	74.6448	133.6139	230.0799	0.1019
Z013E0019/PHZ51	10.1967	19.9407	737.0865	71.6837	74.5665	122.0862	239.7280	0.1411
Z013E0020/LH185	10.3780	21.1565	708.7949	71.8732	74.0024	92.5468	220.6304	0.0535
Z013E0020/LH82	7.6349	19.1758	727.6705	69.0918	71.4418	81.4818	200.0893	0.0743
Z013E0020/PHZ51	9.1586	19.7440	741.1125	72.1266	73.3340	111.7252	244.2699	0.0865
Z013E0021/LH195	9.4806	20.5264	754.2573	75.3829	77.1930	110.6612	219.0508	0.0812
Z013E0021/PB80	9.3917	19.4416	757.9669	74.4742	76.0783	118.8284	220.6126	0.1070
Z013E0022/LH185	10.2837	21.2849	697.9095	71.5326	73.4817	99.5063	215.5020	0.0880
Z013E0022/LH195	9.9701	20.1783	726.8041	75.1447	76.7470	112.4081	218.1968	0.0400
Z013E0022/LH198	8.1012	21.2116	723.3428	73.0460	74.6952	108.4600	214.3976	0.0743
Z013E0022/LH82	8.4425	18.6331	734.5482	66.1522	68.8619	91.1856	184.3562	0.0913
Z013E0022/PB80	9.8040	19.8627	723.3421	74.7568	76.4893	120.5122	226.4278	0.0778
Z013E0022/PHZ51	9.6342	19.1692	728.8049	70.2753	73.5797	111.5680	240.8675	0.0130
Z013E0026/LH185	11.4750	21.0621	727.0873	71.4101	72.8175	113.2529	228.8395	0.0806
Z013E0026/LH195	10.3170	21.1223	764.9913	74.2786	75.3366	115.0629	226.6475	0.0807
Z013E0026/LH198	8.4433	21.9754	734.1148	71.9027	73.5870	120.8962	225.1079	0.0790
Z013E0026/LH82	8.7593	19.9346	725.5039	69.2127	71.4797	105.9688	207.1284	0.1421
Z013E0026/PB80	10.5420	20.4729	769.5101	73.6954	74.8643	124.7783	230.5300	0.1488
Z013E0026/PHZ51	10.0499	18.9381	771.2585	70.5463	73.0779	117.5515	234.5216	0.0971
Z013E0027/LH195	10.0142	21.0394	743.0047	75.2849	76.5373	110.9585	219.8545	0.0551
Z013E0027/PB80	9.5321	19.8596	746.9471	73.8191	75.3862	120.9300	227.0383	0.1108
Z013E0028/LH185	10.8195	21.7173	704.7866	69.9245	72.1737	113.9341	229.8479	0.0775
Z013E0028/LH198	8.1007	20.6725	733.7930	72.9619	75.7030	118.5877	216.5130	0.0957
Z013E0028/LH82	9.0732	18.0127	760.2802	66.4934	68.5908	88.3942	200.3051	0.0438
Z013E0028/PHZ51	8.9420	18.6080	748.4389	72.6544	75.6455	123.5271	240.8791	0.0463
Z013E0032/LH185	10.3360	21.0301	709.2352	69.8371	71.9225	94.3317	214.6397	0.0812
Z013E0032/LH195	8.6802	20.9351	756.1868	74.7386	76.4665	102.5573	216.1347	0.0513
Z013E0032/LH82	10.2615	16.9670	739.9315	64.1578	67.2523	75.2034	181.8193	0.0121
Z013E0032/PB80	9.3646	20.2301	745.2275	73.3994	74.9641	108.9402	212.9879	0.0968
Z013E0034/LH185	10.3117	20.7180	718.6386	69.4621	71.9684	96.0582	218.9813	0.0907
Z013E0034/LH198	8.6298	22.0819	724.1354	72.0778	75.6875	104.0377	218.1757	0.0761
Z013E0034/LH82	9.2398	20.6470	708.2394	67.7465	70.1564	89.4269	188.4905	0.0657
Z013E0034/PHZ51	10.6895	17.8440	745.9731	71.2198	74.0233	118.9768	246.1968	0.0684
Z013E0035/LH198	7.0790	22.4577	743.1965	74.2209	79.2155	117.6314	227.3504	0.0684
Z013E0036/LH185	10.3645	22.4973	697.4483	74.0459	76.0163	110.7817	233.7436	0.0664
Z013E0036/PHZ51	9.4138	21.9149	748.1438	71.4570	74.0124	130.5980	243.4443	0.1083
Z013E0037/LH185	9.7524	21.0750	727.2817	71.9112	73.3866	99.9289	216.9108	0.0543
Z013E0037/LH195	8.6844	20.8220	759.6869	75.8155	77.7859	113.9841	221.4280	0.0428
Z013E0037/LH82	8.9904	19.9168	735.1829	69.9950	74.5762	99.8446	203.8136	0.1236
Z013E0037/PB80	8.7366	20.2862	760.7503	73.9259	75.4559	121.2489	221.3368	0.0998
Z013E0037/PHZ51	9.3672	19.2979	739.1669	72.5353	75.4988	128.7920	235.8742	0.0582
Z013E0039/LH185	9.8520	21.7767	708.6324	72.4296	74.6113	106.5565	222.4472	0.0817
Z013E0039/LH198	10.8911	19.7303	704.3976	69.2670	70.3729	114.4866	226.4905	0.0770
Z013E0042/PB80	9.1247	20.2962	750.9246	72.0031	73.7584	118.1453	217.0188	0.1093
Z013E0044/LH195	9.3630	21.2428	726.3247	76.1505	77.1431	118.3885	233.7267	0.0784
Z013E0044/PB80	8.4363	20.2308	722.9331	74.4387	76.3524	121.1426	235.1312	0.1249
Z013E0045/LH185	11.7131	21.7915	718.5399	72.2809	75.3361	108.7005	226.7428	0.0518
Z013E0045/LH198	8.3030	22.5292	718.5492	75.0269	78.3533	117.5619	228.2957	0.0930
Z013E0045/PHZ51	9.1962	21.2345	755.8710	72.2300	76.3343	128.7249	252.0202	0.1592
Z013E0046/LH185	11.1628	22.9252	703.5150	72.6624	75.0240	104.0038	220.3297	0.0625
Z013E0046/LH195	10.8258	21.9114	751.6328	76.1670	77.8345	112.0362	219.6846	0.0423
Z013E0046/LH198	9.7210	22.2578	722.5200	73.4477	76.5026	110.7999	218.4616	0.0777
Z013E0046/LH82	9.6671	19.3331	745.5677	68.0506	71.2437	104.4559	186.2035	0.0373
Z013E0046/PB80	10.1609	20.4675	749.3439	75.8049	77.4015	119.1059	222.9344	0.0749
Z013E0047/LH195	9.6388	20.8569	760.1615	75.3674	76.2988	110.1310	221.3938	0.0672
Z013E0047/PHZ51	8.7208	18.7700	768.7495	69.1578	73.2523	114.0089	245.7085	0.1499
Z013E0052/LH185	9.9757	22.6230	701.9971	71.7263	73.4291	107.2233	220.4236	0.1000
Z013E0052/LH82	8.2679	20.3931	709.4799	68.0507	71.3055	87.7351	192.1721	0.1038
Z013E0052/PHZ51	9.0170	20.1823	734.0741	70.3548	73.6177	105.2207	237.6104	0.1329
Z013E0055/LH185	10.8241	21.3245	724.3292	71.6409	73.0286	108.5724	223.9924	0.0749
Z013E0055/LH198	7.5923	21.7566	726.9932	72.8892	76.6335	109.7361	218.0824	0.0806
Z013E0055/LH82	9.3223	19.0181	735.8846	67.9078	69.1477	104.5535	196.4090	0.0660
Z013E0055/PHZ51	6.2369	19.3976	729.8586	72.8449	NA	113.4174	229.6016	NA
Z013E0056/LH185	9.8616	21.5323	716.0295	70.9445	72.7879	96.0300	214.9063	0.0502
Z013E0056/LH82	7.4692	18.1931	727.4033	67.0239	68.9057	86.5594	190.7767	0.0587
Z013E0056/PHZ51	8.8394	17.9920	752.1141	71.1848	72.8851	111.3728	230.3720	0.0912
Z013E0058/LH195	7.7693	21.8551	738.5904	74.4854	76.4231	122.6043	227.1690	0.0474
Z013E0058/PB80	8.6686	20.0922	756.0823	73.9319	75.4522	123.9871	233.6145	0.1557
Z013E0058/PHZ51	10.4245	19.4346	733.5906	72.1410	74.0378	130.2480	256.6191	0.0623
Z013E0059/LH185	10.3735	20.6784	722.9418	70.7188	72.1951	106.3257	218.8419	0.0924
Z013E0059/LH198	8.8707	20.5274	743.2451	70.8604	74.5216	113.4537	217.4206	0.0744
Z013E0059/PHZ51	9.2323	19.4903	755.2383	69.6304	72.0708	108.9904	228.7486	0.0766
Z013E0061/LH198	8.7080	19.7158	737.7558	71.2474	74.2114	109.0141	216.9198	0.1462
Z013E0062/LH195	8.4598	20.6524	741.5369	75.5833	76.7392	111.7960	225.8984	0.0473
Z013E0062/PB80	8.6246	19.9575	750.9382	75.4775	76.7150	117.7520	232.2701	0.0752
Z013E0063/LH185	10.7161	20.2124	730.2857	69.8133	72.1156	97.8782	221.5925	0.0703
Z013E0063/LH198	7.9613	19.5121	747.6659	70.8963	74.9779	104.1966	214.5278	0.0881
Z013E0063/PHZ51	9.5793	19.0257	738.7311	71.0735	73.6111	119.4341	233.6095	0.0529
Z013E0066/PB80	8.4885	22.6608	754.4010	74.5780	76.5750	116.8082	229.4167	0.0741
Z013E0066/PHZ51	8.9936	21.5695	713.9947	72.1917	72.7742	124.9345	247.4429	0.0781
Z013E0067/LH185	10.2226	20.2268	727.4421	71.3890	73.5196	107.0290	223.8666	0.0665
Z013E0067/LH198	7.4002	21.1444	725.7976	73.7705	76.8290	110.9987	218.3929	0.0744
Z013E0067/PHZ51	10.0774	20.4611	743.2057	71.8630	73.5600	118.8797	246.7893	0.1269
Z013E0069/PB80	10.2178	20.4187	738.8598	73.9498	76.3504	128.3296	230.7652	0.0970
Z013E0072/LH185	10.0884	20.7476	723.7108	70.1904	72.9871	99.8126	229.0332	0.1024
Z013E0072/LH198	8.7221	20.1688	739.2774	72.3128	75.0119	113.3037	227.5477	0.0750
Z013E0072/LH82	8.5450	18.1187	760.8002	67.6457	70.2769	88.8411	190.8046	0.0911
Z013E0072/PHZ51	10.3169	18.6567	745.1043	71.9902	74.0281	121.9567	256.5915	0.0552
Z013E0073/LH185	10.4555	23.4785	718.1554	73.1300	74.7796	106.8249	225.2916	0.1828
Z013E0073/LH198	9.4402	22.5196	718.2308	72.8188	75.5362	114.4477	214.4049	0.0854
Z013E0073/PB80	9.9387	20.0995	722.3003	74.9154	76.7831	114.5720	219.3394	0.0499
Z013E0073/PHZ51	9.7763	20.3455	744.9532	73.3477	75.5757	115.3443	238.1370	0.0540
Z013E0074/LH195	9.0385	21.0142	751.4902	75.9912	77.7720	100.5354	216.8898	0.0422
Z013E0074/PB80	7.9880	20.0199	747.3472	75.1262	76.9862	111.3018	220.8299	0.0630
Z013E0078/LH185	11.3169	20.4563	719.5152	71.3261	73.7712	102.1807	218.4835	0.0664
Z013E0078/LH195	8.3730	23.0955	721.1112	75.8692	77.0477	118.0137	227.3932	0.0070
Z013E0078/LH198	8.3263	20.5787	730.2093	71.7011	74.0734	112.0458	223.9006	0.0898
Z013E0078/PB80	8.9926	20.5995	745.5024	73.9069	75.4675	119.8857	224.1717	0.0908
Z013E0078/PHZ51	10.2170	19.2415	748.0856	71.5095	73.3346	120.5528	241.6369	0.0454
Z013E0079/LH185	9.5354	19.8345	725.8018	69.7703	72.4143	102.5029	227.4184	0.0835
Z013E0079/LH198	7.1053	20.3958	744.8712	70.6009	75.4235	103.2184	216.8950	0.0614
Z013E0079/LH82	10.6873	19.3002	724.2981	65.6806	69.0892	104.5532	209.8539	0.0643
Z013E0079/PHZ51	9.7343	17.8715	748.0203	67.7953	73.4865	120.1678	241.0195	0.0704
Z013E0080/LH185	10.7509	21.4653	733.9135	71.3182	72.7861	100.1253	224.9073	0.0680
Z013E0080/LH198	9.2485	21.1745	735.3763	70.3528	73.5669	114.3298	225.7688	0.1022
Z013E0080/LH82	8.9489	20.5802	735.3748	66.4945	69.8706	89.7036	210.2437	0.0704
Z013E0080/PHZ51	10.4374	20.5581	763.4453	71.2055	73.7726	111.6679	235.8071	0.0719
Z013E0082/LH185	10.8120	21.7974	689.5251	71.9220	73.6338	111.1944	229.7390	0.0617
Z013E0082/LH195	9.6139	21.1181	734.8497	75.1152	76.8231	109.0891	218.0830	0.0798
Z013E0082/LH198	8.6820	20.9298	724.9093	73.9367	77.4222	114.5093	225.0309	0.0694
Z013E0082/LH82	9.7359	19.5457	712.1239	68.6041	71.8557	94.0840	187.6969	0.0662
Z013E0082/PHZ51	10.4623	19.2998	727.9064	71.1103	74.0696	117.1636	239.6526	0.0619
Z013E0087/LH185	10.1919	20.0850	729.3939	70.6215	72.8222	97.8438	214.7347	0.0599
Z013E0087/LH195	10.4568	19.6442	778.2995	74.1274	76.4477	110.9510	229.6940	0.1627
Z013E0087/LH198	9.1949	19.7623	746.2745	71.9114	74.9305	109.0183	222.7697	0.0760
Z013E0087/LH82	9.5089	19.7080	754.1921	67.3454	70.0372	89.6007	196.3418	0.1162
Z013E0087/PB80	9.8419	20.5185	743.3435	73.6855	75.2887	112.9781	223.8828	0.1207
Z013E0087/PHZ51	10.5013	18.9628	744.4459	70.3824	71.8726	113.8946	239.4943	0.0506
Z013E0088/LH195	9.7182	20.9436	763.4861	75.9062	78.0049	106.5301	233.8577	0.0689
Z013E0088/LH198	8.1281	20.0490	746.4386	72.7498	76.7038	118.2207	234.2614	0.1005
Z013E0090/LH185	9.2402	20.9416	721.4733	70.3599	72.5962	90.6883	212.5096	0.0786
Z013E0090/LH198	8.8693	20.1734	746.8313	71.1724	73.8945	106.7976	216.2992	0.0747
Z013E0090/LH82	7.5906	18.5837	750.7852	66.7080	69.2285	76.7432	175.4325	0.2145
Z013E0090/PHZ51	10.0246	19.3885	773.7971	70.0622	72.6808	112.7832	230.3259	0.1114
Z013E0092/LH198	8.2969	21.6649	736.9463	72.3126	75.7878	107.8318	219.2710	0.0894
Z013E0093/LH185	9.5925	21.8928	700.2147	70.1222	72.5553	109.6866	213.2144	0.1046
Z013E0093/LH198	9.3641	21.4136	726.2941	72.3478	76.1290	110.9110	215.0282	0.0982
Z013E0093/PHZ51	9.5282	18.4533	738.2942	69.1094	71.3813	124.3883	245.5384	0.0896
Z013E0111/PB80	8.2255	20.4598	753.6690	74.2988	76.2497	114.3782	214.6735	0.0527
Z022E0003/LH185	10.1641	17.8280	700.6967	68.6781	70.6611	105.4840	218.3491	0.0768
Z022E0003/LH198	8.4391	18.5484	727.3680	70.6377	73.0058	111.6489	221.2037	0.0961
Z022E0003/LH82	9.0544	16.6428	730.8593	65.2519	67.2625	83.8593	180.1219	0.0479
Z022E0003/PHZ51	10.2123	18.5300	706.1693	70.0970	71.7933	124.4404	245.2115	0.1420
Z022E0005/CG102	8.4806	14.7007	743.9783	63.1191	64.9756	107.2272	212.7502	0.1005
Z022E0005/LH185	9.9376	17.9896	707.6463	68.5747	70.6273	108.8490	225.8221	0.1017
Z022E0005/LH198	7.3732	18.2982	731.6003	70.9361	73.5433	106.0385	214.4776	0.1406
Z022E0005/PB80	6.5049	19.6672	701.9565	73.7695	76.5716	110.6132	210.3175	0.1370
Z022E0005/PHZ51	9.0672	17.3222	736.0271	69.9906	71.8432	126.0986	251.8717	0.0795
Z022E0006/CG102	9.0424	16.3544	740.6109	62.9547	63.9899	109.3453	212.9071	0.0901
Z022E0006/LH185	9.3147	17.8898	722.4831	68.0556	69.4347	95.3292	211.0136	0.0782
Z022E0006/LH195	9.1591	19.4534	NA	73.1682	73.3114	107.5708	219.2516	0.0172
Z022E0006/LH198	8.7476	17.7558	NA	NA	NA	106.2864	218.1017	NA
Z022E0006/PB80	8.2937	19.3346	736.1168	70.3932	72.1073	110.4962	211.8558	0.0568
Z022E0006/PHZ51	9.0871	18.9987	736.7184	67.0354	67.9179	106.0805	228.1358	0.0788
Z022E0008/CG102	8.8211	14.1590	748.0627	62.3024	65.1491	99.2549	217.4789	0.0955
Z022E0008/LH185	9.8046	19.1285	700.7742	68.7744	70.7678	99.1563	219.5860	0.0713
Z022E0008/LH198	7.9565	20.0033	726.0176	71.3813	74.1501	110.9750	224.1441	0.0976
Z022E0008/PHZ51	10.0713	17.6387	741.8565	70.5559	74.9541	131.0865	264.9868	0.0855
Z022E0009/CG102	8.7654	15.3842	746.6728	63.3160	65.0844	101.8727	219.3724	0.0886
Z022E0009/LH185	9.9154	18.3675	712.4009	69.0881	71.0818	100.0429	224.1642	0.0591
Z022E0009/LH195	7.4929	20.2611	735.1880	72.7974	75.7367	109.0408	224.8130	0.0770
Z022E0009/LH82	7.7761	18.8728	723.1031	65.8713	68.0455	77.5488	186.0631	0.1013
Z022E0009/PB80	8.9407	19.2041	724.0739	70.7184	73.4607	115.2890	218.7482	0.1301
Z022E0009/PHZ51	9.3613	18.3300	731.3222	72.0038	74.4386	116.3220	269.3889	0.0798
Z022E0016/PB80	7.4351	19.5313	682.8380	70.1862	74.1732	102.0128	208.0656	0.0767
Z022E0017/CG102	9.0963	14.3307	767.3015	63.5086	66.7987	98.3301	228.1539	0.0861
Z022E0017/LH185	10.0567	17.1979	717.6171	68.2215	70.6797	104.6149	226.1184	0.0681
Z022E0017/LH195	8.5445	19.3113	745.6021	73.6715	76.0879	111.6573	232.3717	0.0804
Z022E0017/LH198	8.0772	16.6307	744.4119	69.9944	73.3572	108.3508	217.8182	0.0880
Z022E0017/PB80	7.6985	18.0377	751.8874	69.2305	73.0571	104.4098	222.1819	0.0856
Z022E0017/PHZ51	9.2217	17.3121	725.7176	69.9663	72.6538	122.3207	258.1178	0.0835
Z022E0020/CG102	8.7201	14.9464	762.7451	59.6209	62.6417	91.3203	216.1866	0.0955
Z022E0020/LH198	8.8193	17.5266	744.2295	68.6472	70.7256	111.6545	215.4496	0.1187
Z022E0023/CG102	8.6998	14.9888	753.7693	62.6209	65.6417	91.3002	192.1866	0.0955
Z022E0023/LH185	10.4031	18.6890	723.7111	68.3126	70.9468	96.4729	210.5683	0.0939
Z022E0023/LH195	7.1331	19.2193	NA	76.3746	79.6868	99.3934	220.7603	-0.0757
Z022E0023/LH198	7.2620	20.0742	730.4356	70.9073	73.5545	101.6656	204.1864	0.0760
Z022E0023/LH82	8.1139	18.3821	728.9821	66.0789	70.9377	83.1134	183.0384	0.0280
Z022E0023/PB80	7.5883	19.8890	740.5215	73.2078	75.4830	103.2433	199.8389	0.0873
Z022E0023/PHZ51	8.9191	19.4737	716.2217	69.9200	72.5628	108.2319	238.9840	0.0692
Z022E0025/CG102	8.4631	14.9981	749.2135	61.0623	62.3673	110.2389	213.2306	0.0882
Z022E0025/LH185	9.8439	18.4998	716.0473	67.0479	69.1324	93.1945	218.1503	0.1155
Z022E0025/LH198	8.7590	18.3684	733.2018	68.2861	71.6613	102.7192	219.1364	0.1049
Z022E0025/LH82	9.6241	17.3155	726.3091	65.7643	68.2796	92.7897	197.1391	0.1264
Z022E0025/PB80	8.2234	18.8425	730.5030	70.0149	72.2809	101.3196	208.0447	0.0905
Z022E0025/PHZ51	9.4419	17.0602	730.2374	69.1460	71.1903	106.0830	242.2797	0.0439
Z022E0027/CG102	8.0812	15.3684	762.3224	63.5481	65.3164	93.5548	197.0001	0.0932
Z022E0027/LH185	9.3324	18.1218	718.3453	68.7174	70.2936	97.7043	215.4148	0.0639
Z022E0027/LH198	7.7473	19.3036	740.0084	70.7871	73.1426	100.8016	205.9010	0.0659
Z022E0027/PHZ51	8.3825	17.7893	738.2579	69.5966	72.2835	108.0714	229.6651	0.0995
Z022E0029/PB80	7.3534	20.0398	733.3472	72.7702	74.9006	112.0924	213.9530	0.0815
Z022E0036/CG102	5.5375	14.6140	739.6283	62.6209	65.6417	97.4628	221.1866	0.0955
Z022E0036/LH185	9.1472	18.3097	709.8278	68.1018	70.2819	100.2151	215.1105	0.0842
Z022E0036/LH195	7.0549	18.9976	NA	74.3746	76.6868	89.5265	223.6705	-0.0016
Z022E0036/LH198	7.9184	19.0224	NA	NA	NA	121.3191	229.6871	NA
Z022E0036/LH82	7.5993	18.2908	734.9653	65.9931	67.3734	83.2249	194.6911	0.0580
Z022E0036/PB80	7.9495	19.9734	722.2754	71.8897	74.0995	108.8378	212.8051	0.0630
Z022E0036/PHZ51	7.5412	17.7698	728.0248	69.6427	73.6568	121.6784	243.0325	0.2116
Z022E0042/CG102	9.8884	14.1523	722.8584	64.6209	65.6417	102.9494	214.9789	0.0955
Z022E0042/LH185	9.6276	18.8004	699.9178	69.4769	71.4802	101.6419	222.7065	0.0923
Z022E0042/LH198	8.3108	19.8059	732.3482	71.4474	73.3187	108.0702	215.4713	0.1441
Z022E0042/LH82	7.9791	17.5954	736.4717	65.3190	67.9563	71.6077	172.4459	0.1137
Z022E0042/PHZ51	9.9698	18.6977	739.3188	69.0611	70.6526	110.4628	235.2850	0.0715
Z022E0044/CG102	9.6655	16.0772	733.9031	64.2243	66.0066	110.0903	222.9669	0.0976
Z022E0044/LH198	8.0633	20.9432	724.2111	71.4182	74.0845	117.5090	225.1024	0.1553
Z022E0046/LH185	9.6819	18.9924	708.0870	69.1549	71.4717	99.0714	219.2881	0.0643
Z022E0046/LH198	7.1295	18.3067	734.2325	71.3100	73.5408	101.8174	213.9661	0.0780
Z022E0046/LH82	8.2943	18.0242	723.4036	63.6925	NA	75.2196	194.8093	NA
Z022E0046/PHZ51	10.3946	17.3005	737.9758	71.0275	73.4195	114.9075	241.9160	0.0535
Z022E0048/CG102	8.3316	15.4666	750.8814	62.6209	65.6417	104.1664	207.1866	0.0955
Z022E0048/LH185	10.4241	19.2437	714.6164	69.3048	71.8220	98.2763	220.8302	0.0495
Z022E0048/LH195	8.9145	20.7679	739.2923	74.0619	75.9214	102.7557	216.6860	0.0489
Z022E0048/LH198	7.4416	19.3045	740.9259	71.4131	73.8843	103.3651	218.4816	0.1004
Z022E0048/LH82	9.3757	19.7356	715.2970	66.2711	68.7095	80.3275	197.9205	0.1115
Z022E0048/PHZ51	8.4161	18.3881	728.8265	70.7943	73.2017	107.4244	242.7533	0.0837
Z022E0050/CG102	9.2972	14.4720	735.7137	62.7118	64.4705	100.8188	219.5831	0.0917
Z022E0050/LH198	7.9490	17.0646	747.6886	70.0887	71.9144	102.6519	211.6091	0.0749
Z022E0050/LH82	8.5847	17.8289	726.8616	65.7069	67.2452	77.1209	181.1388	0.0831
Z022E0050/PB80	8.0283	18.9944	729.2280	70.6063	72.5987	112.5151	214.0593	0.0571
Z022E0050/PHZ51	8.8020	17.8694	736.6486	69.8586	72.1926	112.3006	235.9091	0.1485
Z022E0051/LH185	10.1864	18.2262	720.4273	69.2400	71.4799	99.4139	220.5422	0.0839
Z022E0051/LH195	8.1322	19.4459	NA	76.3746	76.6868	106.1535	203.7175	-0.0757
Z022E0051/PB80	7.9380	19.3893	730.0052	73.2320	75.1134	109.5192	213.4956	0.1033
Z022E0051/PHZ51	10.3638	18.3377	725.3334	71.1240	73.5862	129.2224	244.0703	0.0253
Z022E0053/CG102	8.1923	18.4009	747.2033	70.0857	73.2448	111.2998	212.9057	0.0975
Z022E0053/LH185	9.2453	19.0988	712.0141	69.0847	71.2850	107.2709	213.7393	0.0909
Z022E0053/LH198	7.8348	19.7480	737.6105	70.4609	73.0757	106.4551	211.0555	0.0807
Z022E0053/LH82	8.3662	18.1469	734.4915	66.6911	70.5659	83.8051	180.8464	0.1162
Z022E0053/PHZ51	7.2728	18.3986	729.9932	70.4722	73.4706	121.3619	227.6096	0.1698
Z022E0059/CG102	9.1276	15.7143	736.0344	64.0339	65.5316	103.2169	221.0489	0.0907
Z022E0059/LH185	9.7047	18.7878	708.6612	69.4038	71.0729	100.6630	226.4863	0.1023
Z022E0059/LH195	8.4247	18.9609	760.2543	74.3569	76.3465	105.7994	225.0799	0.0328
Z022E0059/LH198	7.4063	19.6554	745.9183	71.1640	73.4242	103.3513	217.2577	0.1261
Z022E0059/LH82	8.1896	18.9049	727.8030	65.9915	67.8369	82.4455	194.4677	0.0716
Z022E0059/PB80	7.3682	20.0932	732.8957	72.2371	74.3984	104.8379	219.4671	0.0829
Z022E0059/PHZ51	9.5454	17.2697	743.3234	68.8464	72.1263	108.7003	241.2875	0.1066
Z022E0060/LH195	9.3553	20.8408	743.1098	72.7673	74.9316	112.4815	224.4853	0.0546
Z022E0060/PB80	8.2540	19.4862	734.4768	72.3617	75.2553	118.7446	216.8822	0.0655
Z022E0072/CG102	8.9007	15.8248	766.8599	60.1096	62.3375	87.3492	208.5324	0.0886
Z022E0072/LH195	9.8577	19.0698	744.0435	71.5423	73.2082	114.6412	226.4750	-0.0062
Z022E0072/LH198	8.2108	18.1669	746.3941	68.7340	70.3656	101.5098	221.8756	0.0692
Z022E0072/LH82	8.5110	17.5337	741.8979	64.4563	65.8026	80.1287	191.8079	0.0668
Z022E0072/PB80	9.1178	19.4509	749.1388	68.9146	71.6930	103.3690	224.2157	0.0514
Z022E0072/PHZ51	9.8363	17.2815	749.9476	68.7270	70.3312	105.3312	244.2492	0.0911
Z022E0073/CG102	8.1001	15.9511	747.1633	63.6805	65.4136	92.7639	210.2435	0.1031
Z022E0073/LH185	8.3760	17.9804	732.9757	69.0721	70.9929	102.2932	224.2738	0.1468
Z022E0073/LH195	10.2899	20.4421	734.0732	72.9119	74.5355	102.0292	221.2163	0.0696
Z022E0073/LH198	6.8132	19.6919	728.8652	70.6518	73.5463	100.3939	216.0624	0.0990
Z022E0073/LH82	6.5410	17.7596	748.4940	65.4443	68.6965	74.1178	196.8666	0.1959
Z022E0073/PHZ51	8.8367	19.5078	729.7533	69.1084	71.5931	123.2583	243.3251	0.1017
Z022E0077/CG102	7.5876	13.9494	757.0155	61.8692	63.9528	87.0471	194.9721	0.0908
Z022E0077/LH185	8.9612	16.9803	721.2704	68.3004	70.0664	100.5870	218.2276	0.1014
Z022E0077/LH195	9.7036	20.5310	740.0383	73.6173	75.2604	107.7767	218.8252	0.0469
Z022E0077/LH198	8.6831	19.4220	733.5063	70.1280	72.7003	102.8557	216.6633	0.1059
Z022E0077/LH82	7.5951	17.5515	751.3290	66.0848	68.8266	64.2866	173.4192	0.0087
Z022E0077/PHZ51	8.6772	16.6464	729.5200	69.2133	70.4520	109.2603	234.6934	0.0926
Z022E0079/LH198	7.5845	18.2832	747.4714	70.8822	72.6889	110.1778	220.0023	0.1265
Z022E0082/CG102	8.9039	13.3329	789.7259	63.6209	65.6417	104.3371	212.1866	0.0955
Z022E0083/LH195	8.1930	18.8305	NA	74.3746	74.6868	111.3733	224.2441	-0.0280
Z022E0083/PB80	8.4473	19.4416	728.7744	71.5682	73.1487	114.0451	222.3027	0.0745
Z022E0094/PB80	7.4822	19.9176	725.0255	72.3962	74.8929	116.3443	223.5672	0.0629
Z022E0095/LH185	9.7396	18.6019	717.7303	68.5423	70.2205	97.7452	222.6958	0.0528
Z022E0095/LH195	8.9053	21.1007	752.3423	71.5507	74.4757	102.1352	221.2401	0.0131
Z022E0095/LH198	8.0986	19.9416	741.4540	70.5373	74.0910	99.6245	208.5663	0.0547
Z022E0095/PHZ51	9.3460	19.0611	732.2791	70.6071	72.9095	103.7405	239.4879	0.0780
Z022E0097/LH185	11.5566	18.0323	716.6205	69.3574	71.1642	113.3168	237.9199	0.0661
Z022E0097/LH195	9.3651	19.8850	730.9198	74.6180	76.1700	114.5883	234.1691	0.0271
Z022E0097/LH198	8.6739	19.1183	733.3583	71.0979	74.0741	111.2042	224.1222	0.1144
Z022E0097/LH82	9.0647	17.5525	739.8780	66.4603	70.3487	89.3708	207.2672	0.1163
Z022E0097/PHZ51	10.2908	18.6360	732.2363	70.8940	73.3527	125.1412	249.6306	0.0457
Z022E0105/CG102	6.5853	14.8315	736.8243	62.8024	66.1491	98.9083	213.9789	0.0955
Z022E0105/LH185	9.5496	18.5075	709.5485	69.5873	71.7546	109.8453	229.3555	0.1103
Z022E0105/LH198	7.9907	19.1854	731.7608	71.0699	74.4348	111.5685	224.3895	0.1129
Z022E0105/LH82	7.5938	19.0368	726.6599	65.6679	68.6041	80.0443	187.7202	0.0660
Z022E0105/PHZ51	9.9151	17.5661	730.6475	69.0725	73.1786	110.6690	240.3079	0.0822
Z022E0108/LH185	9.7349	17.3301	723.3760	69.0525	71.2302	95.9553	224.9572	0.0662
Z022E0108/LH195	9.0381	19.2556	745.3303	73.8273	75.1440	111.4890	232.1031	0.0551
Z022E0108/LH198	7.5712	18.2983	736.0784	71.5370	74.7455	104.0883	214.3130	0.0893
Z022E0108/LH82	8.7519	18.0940	735.0416	65.1864	68.5566	87.1818	205.1332	0.0590
Z022E0108/PB80	8.4580	18.8974	721.2747	71.8436	73.7745	111.5580	221.6271	0.0784
Z022E0108/PHZ51	9.3903	16.8705	738.9644	70.4397	71.9672	120.0180	251.2246	0.0654
Z022E0110/CG102	8.6922	16.5840	753.4584	63.5097	65.9402	108.1516	225.6818	0.0907
Z022E0110/LH185	10.0201	18.5833	707.2785	68.5674	70.4219	99.3225	218.1287	0.0579
Z022E0110/LH195	9.5154	19.8618	728.9886	72.9221	74.4270	111.4182	227.0373	0.0610
Z022E0110/LH198	7.2891	19.2776	728.4561	70.1615	73.0887	107.2342	209.7238	0.0903
Z022E0110/LH82	9.7796	18.3686	NA	63.0273	64.1502	80.2885	203.8880	0.1766
Z022E0110/PB80	8.3366	19.1522	719.7229	73.0730	75.7451	121.9832	217.9965	0.0489
Z022E0110/PHZ51	9.5832	18.3667	737.6349	68.7146	71.1851	109.0104	244.7204	0.0418
Z022E0114/LH185	9.1084	18.3364	723.5631	69.4336	71.3973	100.8667	225.3635	0.1028
Z022E0114/LH198	8.2715	19.5598	734.5253	71.7085	73.1651	110.3702	223.6208	0.1501
Z022E0114/LH82	8.7860	18.3150	721.4929	64.5359	67.3591	77.2000	196.4483	0.1969
Z022E0114/PHZ51	9.0377	18.2965	728.2469	71.5486	74.6549	127.4739	268.2003	0.1097
Z022E0121/CG102	8.5749	14.8004	728.8158	63.2904	65.0279	105.2778	213.2622	0.2179
Z022E0121/LH185	9.1721	17.7346	725.6869	68.3496	70.1111	112.2014	230.1495	0.1315
Z022E0121/LH195	9.6915	19.3452	720.9447	72.9498	74.8631	121.2759	235.9501	0.0707
Z022E0121/LH198	7.5833	16.9458	741.4905	72.1452	74.0369	125.5208	231.0794	0.0919
Z022E0121/LH82	8.6100	17.1843	709.1729	67.4982	69.0095	107.0368	209.6561	0.0872
Z022E0121/PB80	7.6366	18.6790	715.5099	73.4965	75.3443	116.0989	220.7992	0.0982
Z022E0121/PHZ51	9.8033	16.9952	731.0006	71.1000	72.2742	134.1225	261.5768	0.0754
Z022E0123/LH185	9.3903	20.8084	702.9192	69.2186	71.0978	98.2524	213.5259	0.0644
Z022E0123/LH195	10.0270	19.1487	744.8080	72.8180	75.5006	114.9604	219.3107	-0.0434
Z022E0123/LH198	7.7920	21.2785	721.5033	69.4135	73.0568	102.0287	210.3215	0.0893
Z022E0123/PB80	8.8056	19.4159	712.6796	71.4134	74.5206	114.9856	224.9945	0.0576
Z022E0123/PHZ51	7.6534	17.8619	734.1201	70.4996	74.6304	113.5197	244.9811	0.0933
Z022E0130/LH185	10.2572	18.3049	715.9420	68.3099	70.0082	94.0674	226.4473	0.0765
Z022E0134/CG102	9.5807	15.3003	770.9484	63.6775	65.3197	96.8749	208.1169	0.0885
Z022E0134/LH198	7.7756	20.1602	733.8609	71.1590	73.2347	107.4459	212.0975	0.1244
Z022E0142/CG102	9.1944	16.5475	768.0152	63.4386	64.9732	107.0800	213.1619	0.0941
Z022E0142/LH185	9.9332	19.1225	729.7843	68.9468	70.5598	102.3144	219.8870	0.0643
Z022E0142/LH198	7.9605	19.1925	745.4657	70.7871	73.1456	103.8103	211.6031	0.0703
Z022E0142/LH82	8.1182	18.1751	745.3888	65.7643	67.8481	79.5722	187.9932	0.0748
Z022E0142/PHZ51	9.8656	16.9342	757.8173	70.2598	71.6044	118.8254	248.1808	0.0611
Z022E0147/LH195	9.1322	19.9132	745.5349	74.1045	76.5982	111.8364	224.6894	0.0928
Z022E0147/PB80	9.1154	20.0767	728.3708	73.2181	75.3992	115.8285	227.0486	0.0541
Z022E0149/LH185	10.2758	17.8519	709.7436	69.4228	71.2615	96.6270	230.9697	0.0639
Z022E0149/LH82	7.3156	17.9147	724.1553	64.2705	66.4416	76.0561	199.8972	0.0617
Z022E0149/PHZ51	9.9272	18.4392	725.5683	69.6135	72.9953	117.6673	259.0156	0.1041
Z022E0155/LH195	10.0568	21.0810	738.3600	73.4370	74.3678	113.4280	228.6647	0.0668
Z022E0155/PB80	8.5073	19.5118	725.4976	73.6811	74.9043	117.6980	226.8385	0.0709
Z022E0160/CG102	7.8162	14.1513	724.5894	63.6209	65.6417	86.6926	176.1866	0.0955
Z022E0160/LH185	9.6728	18.9415	711.3879	69.5380	71.4227	88.7255	203.6364	0.0800
Z022E0160/LH198	7.1970	21.7821	723.4947	71.1481	73.3351	99.0653	198.3045	0.0869
Z022E0160/LH82	7.6632	18.3361	719.8345	66.9984	69.4767	84.1355	188.8265	0.0622
Z022E0160/PHZ51	7.7367	17.9225	745.1794	68.8799	69.4557	107.5863	232.7923	0.0106
Z022E0166/LH185	9.9061	18.2990	726.2909	68.7197	71.1190	109.2117	222.3945	0.0769
Z022E0166/LH198	7.9858	18.5733	749.7856	69.9337	72.4252	101.9437	206.4136	0.0651
Z022E0166/PHZ51	10.0882	19.5645	736.1377	73.1452	75.0369	134.2278	256.8708	0.0695
Z022E0178/PB80	7.7061	19.5827	729.2830	71.6698	75.6890	111.8570	218.4492	0.0771
Z030E0058/3IIH6	8.7355	17.3038	738.5643	70.4357	71.0892	116.9829	238.7525	0.0706
Z030E0059/3IIH6	5.9310	17.9132	716.5583	73.0257	74.2003	114.6355	217.5874	0.0502
Z032E0081/3IIH6	4.8606	16.8762	720.8292	70.6307	73.0051	111.3660	209.9669	0.0834
Z033E0001/3IIH6	6.0764	17.3216	688.4424	68.6508	70.2639	123.1171	237.5158	0.0769
Z034E0042/3IIH6	6.4924	17.1350	711.4984	67.7367	69.7698	110.0541	222.1129	0.0689
Z035E0047/3IIH6	7.5646	17.2520	704.6310	67.8094	69.2816	114.1575	231.2878	0.0420
Z037E0012/3IIH6	9.5416	17.7177	718.4235	69.0863	70.7708	120.0933	239.9175	0.0695
Z037E0054/3IIH6	7.5738	17.5548	702.2791	68.7422	70.8598	118.0434	234.5659	0.1450
Z038E0057/3IIH6	8.4097	17.4470	697.0404	68.7851	70.5991	118.2334	234.8817	0.0660
